# Supplementary material for: Network analysis, in vivo, and in vitro experiments identified the mechanisms by which Piper longum L. [Piperaceae] alleviates cartilage destruction, joint inflammation, and arthritic pain
Source: Front Pharmacol. 2024 Jan 24;14:1282943. doi: 10.3389/fphar.2023.1282943 (PMC10847597; doi:10.3389/fphar.2023.1282943)
Supplement: Supplementary file 2 [file Table1.XLSX]

## Sheet: Sheet1
Supplementary Table S3. The protein targets from the candidate bioactive components in PL
Database	Ingredient name	PubChem CID	InChIKey	CAS	OB(%)	DL	Target name	Gene name	Uniprot ID
TCMSP	Pisatin	101689	LZMRDTLRSDRUSU-SJORKVTESA-N	469-01-2	88.05	0.64	Carbonic anhydrase II	CA2	P00918
TCMSP	Pisatin	101689	LZMRDTLRSDRUSU-SJORKVTESA-N	469-01-2	88.05	0.64	Phosphodiesterase 4A	PDE4A	P27815
TCMSP	Pisatin	101689	LZMRDTLRSDRUSU-SJORKVTESA-N	469-01-2	88.05	0.64	GABA receptor alpha-5 subunit	GABRA5	P31644
TCMSP	Pisatin	101689	LZMRDTLRSDRUSU-SJORKVTESA-N	469-01-2	88.05	0.64	Placenta growth factor	PGF	P49763
TCMSP	Pisatin	101689	LZMRDTLRSDRUSU-SJORKVTESA-N	469-01-2	88.05	0.64	Vascular endothelial growth factor A	VEGFA	P15692
TCMSP	Pisatin	101689	LZMRDTLRSDRUSU-SJORKVTESA-N	469-01-2	88.05	0.64	Tyrosine-protein kinase SRC	SRC	P12931
TCMSP	Pisatin	101689	LZMRDTLRSDRUSU-SJORKVTESA-N	469-01-2	88.05	0.64	Vascular endothelial growth factor receptor 2	KDR	P35968
TCMSP	Pisatin	101689	LZMRDTLRSDRUSU-SJORKVTESA-N	469-01-2	88.05	0.64	Hypoxanthine-guanine phosphoribosyltransferase	HPRT1	P00492
TCMSP	Pisatin	101689	LZMRDTLRSDRUSU-SJORKVTESA-N	469-01-2	88.05	0.64	Inhibitor of nuclear factor kappa B kinase beta subunit	IKBKB	O14920
TCMSP	Pisatin	101689	LZMRDTLRSDRUSU-SJORKVTESA-N	469-01-2	88.05	0.64	MAP kinase signal-integrating kinase 2	MKNK2	Q9HBH9
TCMSP	Pisatin	101689	LZMRDTLRSDRUSU-SJORKVTESA-N	469-01-2	88.05	0.64	Matrix metalloproteinase 8	MMP8	P22894
TCMSP	Pisatin	101689	LZMRDTLRSDRUSU-SJORKVTESA-N	469-01-2	88.05	0.64	Tyrosine-protein kinase ABL	ABL1	P00519
TCMSP	Pisatin	101689	LZMRDTLRSDRUSU-SJORKVTESA-N	469-01-2	88.05	0.64	Serine/threonine-protein kinase mTOR	MTOR	P42345
TCMSP	Pisatin	101689	LZMRDTLRSDRUSU-SJORKVTESA-N	469-01-2	88.05	0.64	Thymidine kinase, cytosolic	TK1	P04183
TCMSP	Pisatin	101689	LZMRDTLRSDRUSU-SJORKVTESA-N	469-01-2	88.05	0.64	PI3-kinase p110-delta subunit	PIK3CD	O00329
TCMSP	Pisatin	101689	LZMRDTLRSDRUSU-SJORKVTESA-N	469-01-2	88.05	0.64	DNA-dependent protein kinase	PRKDC	P78527
TCMSP	Pisatin	101689	LZMRDTLRSDRUSU-SJORKVTESA-N	469-01-2	88.05	0.64	PI3-kinase p110-beta subunit	PIK3CB	P42338
TCMSP	Pisatin	101689	LZMRDTLRSDRUSU-SJORKVTESA-N	469-01-2	88.05	0.64	Tyrosine-protein kinase HCK	HCK	P08631
TCMSP	Pisatin	101689	LZMRDTLRSDRUSU-SJORKVTESA-N	469-01-2	88.05	0.64	PI3-kinase p110-gamma subunit	PIK3CG	P48736
TCMSP	Pisatin	101689	LZMRDTLRSDRUSU-SJORKVTESA-N	469-01-2	88.05	0.64	PI4-kinase beta subunit	PI4KB	Q9UBF8
TCMSP	Pisatin	101689	LZMRDTLRSDRUSU-SJORKVTESA-N	469-01-2	88.05	0.64	PI3-kinase p110-alpha subunit	PIK3CA	P42336
TCMSP	Pisatin	101689	LZMRDTLRSDRUSU-SJORKVTESA-N	469-01-2	88.05	0.64	Ephrin receptor	EPHB4	P54760
TCMSP	Pisatin	101689	LZMRDTLRSDRUSU-SJORKVTESA-N	469-01-2	88.05	0.64	Inosine-5'-monophosphate dehydrogenase 2	IMPDH2	P12268
TCMSP	Pisatin	101689	LZMRDTLRSDRUSU-SJORKVTESA-N	469-01-2	88.05	0.64	7,8-dihydro-8-oxoguanine triphosphatase	NUDT1	P36639
TCMSP	Pisatin	101689	LZMRDTLRSDRUSU-SJORKVTESA-N	469-01-2	88.05	0.64	Matrix metalloproteinase 9	MMP9	P14780
TCMSP	Pisatin	101689	LZMRDTLRSDRUSU-SJORKVTESA-N	469-01-2	88.05	0.64	Matrix metalloproteinase 2	MMP2	P08253
TCMSP	Pisatin	101689	LZMRDTLRSDRUSU-SJORKVTESA-N	469-01-2	88.05	0.64	Cytochrome P450 19A1	CYP19A1	P11511
TCMSP	Pisatin	101689	LZMRDTLRSDRUSU-SJORKVTESA-N	469-01-2	88.05	0.64	Cyclin-dependent kinase 2/cyclin E	CCNE2 CDK2 CCNE1	O96020 P24941 P24864
TCMSP	Pisatin	101689	LZMRDTLRSDRUSU-SJORKVTESA-N	469-01-2	88.05	0.64	Squalene synthetase	FDFT1	P37268
TCMSP	Pisatin	101689	LZMRDTLRSDRUSU-SJORKVTESA-N	469-01-2	88.05	0.64	Alkaline phosphatase, tissue-nonspecific isozyme	ALPL	P05186
TCMSP	Pisatin	101689	LZMRDTLRSDRUSU-SJORKVTESA-N	469-01-2	88.05	0.64	c-Jun N-terminal kinase 1	MAPK8	P45983
TCMSP	Pisatin	101689	LZMRDTLRSDRUSU-SJORKVTESA-N	469-01-2	88.05	0.64	Pyruvate kinase isozymes M1/M2	PKM	P14618
TCMSP	Pisatin	101689	LZMRDTLRSDRUSU-SJORKVTESA-N	469-01-2	88.05	0.64	Cyclin-dependent kinase 5/CDK5 activator 1	CDK5R1 CDK5	Q15078 Q00535
TCMSP	Pisatin	101689	LZMRDTLRSDRUSU-SJORKVTESA-N	469-01-2	88.05	0.64	Adenosine A2a receptor (by homology)	ADORA2A	P29274
TCMSP	Pisatin	101689	LZMRDTLRSDRUSU-SJORKVTESA-N	469-01-2	88.05	0.64	Dual specificty protein kinase CLK1 (by homology)	CLK1	P49759
TCMSP	Pisatin	101689	LZMRDTLRSDRUSU-SJORKVTESA-N	469-01-2	88.05	0.64	ADAM17	ADAM17	P78536
TCMSP	Pisatin	101689	LZMRDTLRSDRUSU-SJORKVTESA-N	469-01-2	88.05	0.64	Tyrosine-protein kinase JAK1	JAK1	P23458
TCMSP	Pisatin	101689	LZMRDTLRSDRUSU-SJORKVTESA-N	469-01-2	88.05	0.64	Tyrosine-protein kinase JAK2	JAK2	O60674
TCMSP	Pisatin	101689	LZMRDTLRSDRUSU-SJORKVTESA-N	469-01-2	88.05	0.64	Purine nucleoside phosphorylase	PNP	P00491
TCMSP	Pisatin	101689	LZMRDTLRSDRUSU-SJORKVTESA-N	469-01-2	88.05	0.64	Bromodomain-containing protein 4	BRD4	O60885
TCMSP	Pisatin	101689	LZMRDTLRSDRUSU-SJORKVTESA-N	469-01-2	88.05	0.64	Prostatic acid phosphatase	ACPP	P15309
TCMSP	Pisatin	101689	LZMRDTLRSDRUSU-SJORKVTESA-N	469-01-2	88.05	0.64	Cyclin-dependent kinase 2/cyclin A	CDK2 CCNA1 CCNA2	P24941 P78396 P20248
TCMSP	Pisatin	101689	LZMRDTLRSDRUSU-SJORKVTESA-N	469-01-2	88.05	0.64	Liver glycogen phosphorylase	PYGL	P06737
TCMSP	Pisatin	101689	LZMRDTLRSDRUSU-SJORKVTESA-N	469-01-2	88.05	0.64	Fructose-1,6-bisphosphatase	FBP1	P09467
TCMSP	Pisatin	101689	LZMRDTLRSDRUSU-SJORKVTESA-N	469-01-2	88.05	0.64	Caspase-1	CASP1	P29466
TCMSP	Pisatin	101689	LZMRDTLRSDRUSU-SJORKVTESA-N	469-01-2	88.05	0.64	Acyl-CoA desaturase	SCD	O00767
TCMSP	Pisatin	101689	LZMRDTLRSDRUSU-SJORKVTESA-N	469-01-2	88.05	0.64	Tyrosine-protein kinase JAK3	JAK3	P52333
TCMSP	Pisatin	101689	LZMRDTLRSDRUSU-SJORKVTESA-N	469-01-2	88.05	0.64	Carbonic anhydrase IV	CA4	P22748
TCMSP	Pisatin	101689	LZMRDTLRSDRUSU-SJORKVTESA-N	469-01-2	88.05	0.64	Adenosylhomocysteinase	AHCY	P23526
TCMSP	Pisatin	101689	LZMRDTLRSDRUSU-SJORKVTESA-N	469-01-2	88.05	0.64	Dual specificity mitogen-activated protein kinase kinase 1	MAP2K1	Q02750
TCMSP	Pisatin	101689	LZMRDTLRSDRUSU-SJORKVTESA-N	469-01-2	88.05	0.64	Kinesin-like protein 1	KIF11	P52732
TCMSP	Pisatin	101689	LZMRDTLRSDRUSU-SJORKVTESA-N	469-01-2	88.05	0.64	DNA topoisomerase I	TOP1	P11387
TCMSP	Pisatin	101689	LZMRDTLRSDRUSU-SJORKVTESA-N	469-01-2	88.05	0.64	Prostanoid EP3 receptor	PTGER3	P43115
TCMSP	Pisatin	101689	LZMRDTLRSDRUSU-SJORKVTESA-N	469-01-2	88.05	0.64	Cholecystokinin B receptor	CCKBR	P32239
TCMSP	Pisatin	101689	LZMRDTLRSDRUSU-SJORKVTESA-N	469-01-2	88.05	0.64	Bradykinin B1 receptor	BDKRB1	P46663
TCMSP	N-(2,5-dimethoxyphenyl)-4-methoxybenzamide	532276	CFFUCEHTAUTSAT-UHFFFAOYSA-N	NA	60.7	0.18	Estradiol 17-beta-dehydrogenase 2	HSD17B2	P37059
TCMSP	N-(2,5-dimethoxyphenyl)-4-methoxybenzamide	532276	CFFUCEHTAUTSAT-UHFFFAOYSA-N	NA	60.7	0.18	Estradiol 17-beta-dehydrogenase 1	HSD17B1	P14061
TCMSP	N-(2,5-dimethoxyphenyl)-4-methoxybenzamide	532276	CFFUCEHTAUTSAT-UHFFFAOYSA-N	NA	60.7	0.18	Histone deacetylase 1	HDAC1	Q13547
TCMSP	N-(2,5-dimethoxyphenyl)-4-methoxybenzamide	532276	CFFUCEHTAUTSAT-UHFFFAOYSA-N	NA	60.7	0.18	Thrombin and coagulation factor X	F10	P00742
TCMSP	N-(2,5-dimethoxyphenyl)-4-methoxybenzamide	532276	CFFUCEHTAUTSAT-UHFFFAOYSA-N	NA	60.7	0.18	Urokinase-type plasminogen activator	PLAU	P00749
TCMSP	N-(2,5-dimethoxyphenyl)-4-methoxybenzamide	532276	CFFUCEHTAUTSAT-UHFFFAOYSA-N	NA	60.7	0.18	Histone deacetylase 2	HDAC2	Q92769
TCMSP	N-(2,5-dimethoxyphenyl)-4-methoxybenzamide	532276	CFFUCEHTAUTSAT-UHFFFAOYSA-N	NA	60.7	0.18	Histone deacetylase 6	HDAC6	Q9UBN7
TCMSP	N-(2,5-dimethoxyphenyl)-4-methoxybenzamide	532276	CFFUCEHTAUTSAT-UHFFFAOYSA-N	NA	60.7	0.18	Trace amine-associated receptor 1 (by homology)	TAAR1	Q96RJ0
TCMSP	N-(2,5-dimethoxyphenyl)-4-methoxybenzamide	532276	CFFUCEHTAUTSAT-UHFFFAOYSA-N	NA	60.7	0.18	Thrombin	F2	P00734
TCMSP	N-(2,5-dimethoxyphenyl)-4-methoxybenzamide	532276	CFFUCEHTAUTSAT-UHFFFAOYSA-N	NA	60.7	0.18	Potassium channel subfamily K member 9	KCNK9	Q9NPC2
TCMSP	N-(2,5-dimethoxyphenyl)-4-methoxybenzamide	532276	CFFUCEHTAUTSAT-UHFFFAOYSA-N	NA	60.7	0.18	Histone deacetylase 3	HDAC3	O15379
TCMSP	N-(2,5-dimethoxyphenyl)-4-methoxybenzamide	532276	CFFUCEHTAUTSAT-UHFFFAOYSA-N	NA	60.7	0.18	Quinone reductase 2	NQO2	P16083
TCMSP	N-(2,5-dimethoxyphenyl)-4-methoxybenzamide	532276	CFFUCEHTAUTSAT-UHFFFAOYSA-N	NA	60.7	0.18	Androgen Receptor	AR	P10275
TCMSP	N-(2,5-dimethoxyphenyl)-4-methoxybenzamide	532276	CFFUCEHTAUTSAT-UHFFFAOYSA-N	NA	60.7	0.18	Dual specificity mitogen-activated protein kinase kinase 1	MAP2K1	Q02750
TCMSP	N-(2,5-dimethoxyphenyl)-4-methoxybenzamide	532276	CFFUCEHTAUTSAT-UHFFFAOYSA-N	NA	60.7	0.18	Epidermal growth factor receptor erbB1	EGFR	P00533
TCMSP	N-(2,5-dimethoxyphenyl)-4-methoxybenzamide	532276	CFFUCEHTAUTSAT-UHFFFAOYSA-N	NA	60.7	0.18	Dual-specificity tyrosine-phosphorylation regulated kinase 1A	DYRK1A	Q13627
TCMSP	N-(2,5-dimethoxyphenyl)-4-methoxybenzamide	532276	CFFUCEHTAUTSAT-UHFFFAOYSA-N	NA	60.7	0.18	Protein kinase C alpha	PRKCA	P17252
TCMSP	N-(2,5-dimethoxyphenyl)-4-methoxybenzamide	532276	CFFUCEHTAUTSAT-UHFFFAOYSA-N	NA	60.7	0.18	Serine/threonine-protein kinase PLK1	PLK1	P53350
TCMSP	N-(2,5-dimethoxyphenyl)-4-methoxybenzamide	532276	CFFUCEHTAUTSAT-UHFFFAOYSA-N	NA	60.7	0.18	Protein kinase C theta	PRKCQ	Q04759
TCMSP	N-(2,5-dimethoxyphenyl)-4-methoxybenzamide	532276	CFFUCEHTAUTSAT-UHFFFAOYSA-N	NA	60.7	0.18	Histone deacetylase 8	HDAC8	Q9BY41
TCMSP	N-(2,5-dimethoxyphenyl)-4-methoxybenzamide	532276	CFFUCEHTAUTSAT-UHFFFAOYSA-N	NA	60.7	0.18	Protein kinase C epsilon	PRKCE	Q02156
TCMSP	N-(2,5-dimethoxyphenyl)-4-methoxybenzamide	532276	CFFUCEHTAUTSAT-UHFFFAOYSA-N	NA	60.7	0.18	Protein kinase C eta	PRKCH	P24723
TCMSP	N-(2,5-dimethoxyphenyl)-4-methoxybenzamide	532276	CFFUCEHTAUTSAT-UHFFFAOYSA-N	NA	60.7	0.18	Dual specificty protein kinase CLK1	CLK1	P49759
TCMSP	N-(2,5-dimethoxyphenyl)-4-methoxybenzamide	532276	CFFUCEHTAUTSAT-UHFFFAOYSA-N	NA	60.7	0.18	Monoamine oxidase B	MAOB	P27338
TCMSP	N-(2,5-dimethoxyphenyl)-4-methoxybenzamide	532276	CFFUCEHTAUTSAT-UHFFFAOYSA-N	NA	60.7	0.18	Potassium channel subfamily K member 3	KCNK3	O14649
TCMSP	N-(2,5-dimethoxyphenyl)-4-methoxybenzamide	532276	CFFUCEHTAUTSAT-UHFFFAOYSA-N	NA	60.7	0.18	c-Jun N-terminal kinase 3	MAPK10	P53779
TCMSP	N-(2,5-dimethoxyphenyl)-4-methoxybenzamide	532276	CFFUCEHTAUTSAT-UHFFFAOYSA-N	NA	60.7	0.18	c-Jun N-terminal kinase 2	MAPK9	P45984
TCMSP	N-(2,5-dimethoxyphenyl)-4-methoxybenzamide	532276	CFFUCEHTAUTSAT-UHFFFAOYSA-N	NA	60.7	0.18	PI3-kinase p110-gamma subunit	PIK3CG	P48736
TCMSP	N-(2,5-dimethoxyphenyl)-4-methoxybenzamide	532276	CFFUCEHTAUTSAT-UHFFFAOYSA-N	NA	60.7	0.18	Nitric-oxide synthase, brain	NOS1	P29475
TCMSP	N-(2,5-dimethoxyphenyl)-4-methoxybenzamide	532276	CFFUCEHTAUTSAT-UHFFFAOYSA-N	NA	60.7	0.18	PI3-kinase p110-alpha subunit	PIK3CA	P42336
TCMSP	N-(2,5-dimethoxyphenyl)-4-methoxybenzamide	532276	CFFUCEHTAUTSAT-UHFFFAOYSA-N	NA	60.7	0.18	Nitric oxide synthase, inducible	NOS2	P35228
TCMSP	N-(2,5-dimethoxyphenyl)-4-methoxybenzamide	532276	CFFUCEHTAUTSAT-UHFFFAOYSA-N	NA	60.7	0.18	Phosphodiesterase 4D	PDE4D	Q08499
TCMSP	N-(2,5-dimethoxyphenyl)-4-methoxybenzamide	532276	CFFUCEHTAUTSAT-UHFFFAOYSA-N	NA	60.7	0.18	Leucine-rich repeat serine/threonine-protein kinase 2	LRRK2	Q5S007
TCMSP	N-(2,5-dimethoxyphenyl)-4-methoxybenzamide	532276	CFFUCEHTAUTSAT-UHFFFAOYSA-N	NA	60.7	0.18	Bromodomain-containing protein 9	BRD9	Q9H8M2
TCMSP	N-(2,5-dimethoxyphenyl)-4-methoxybenzamide	532276	CFFUCEHTAUTSAT-UHFFFAOYSA-N	NA	60.7	0.18	Tissue-type plasminogen activator	PLAT	P00750
TCMSP	N-(2,5-dimethoxyphenyl)-4-methoxybenzamide	532276	CFFUCEHTAUTSAT-UHFFFAOYSA-N	NA	60.7	0.18	Phosphodiesterase 3	PDE3A	Q14432
TCMSP	N-(2,5-dimethoxyphenyl)-4-methoxybenzamide	532276	CFFUCEHTAUTSAT-UHFFFAOYSA-N	NA	60.7	0.18	Phosphodiesterase 3B	PDE3B	Q13370
TCMSP	N-(2,5-dimethoxyphenyl)-4-methoxybenzamide	532276	CFFUCEHTAUTSAT-UHFFFAOYSA-N	NA	60.7	0.18	Phosphodiesterase 9A	PDE9A	O76083
TCMSP	N-(2,5-dimethoxyphenyl)-4-methoxybenzamide	532276	CFFUCEHTAUTSAT-UHFFFAOYSA-N	NA	60.7	0.18	ADAM17	ADAM17	P78536
TCMSP	N-(2,5-dimethoxyphenyl)-4-methoxybenzamide	532276	CFFUCEHTAUTSAT-UHFFFAOYSA-N	NA	60.7	0.18	Cyclin-dependent kinase 4/cyclin D	CCND3 CCND1 CDK4 CCND2	P30281 P24385 P11802 P30279
TCMSP	N-(2,5-dimethoxyphenyl)-4-methoxybenzamide	532276	CFFUCEHTAUTSAT-UHFFFAOYSA-N	NA	60.7	0.18	Dual specificity protein kinase TTK	TTK	P33981
TCMSP	N-(2,5-dimethoxyphenyl)-4-methoxybenzamide	532276	CFFUCEHTAUTSAT-UHFFFAOYSA-N	NA	60.7	0.18	Plasma kallikrein	KLKB1	P03952
TCMSP	N-(2,5-dimethoxyphenyl)-4-methoxybenzamide	532276	CFFUCEHTAUTSAT-UHFFFAOYSA-N	NA	60.7	0.18	Casein kinase I delta	CSNK1D	P48730
TCMSP	N-(2,5-dimethoxyphenyl)-4-methoxybenzamide	532276	CFFUCEHTAUTSAT-UHFFFAOYSA-N	NA	60.7	0.18	Matrix metalloproteinase 10	MMP10	P09238
TCMSP	N-(2,5-dimethoxyphenyl)-4-methoxybenzamide	532276	CFFUCEHTAUTSAT-UHFFFAOYSA-N	NA	60.7	0.18	TGF-beta receptor type I	TGFBR1	P36897
TCMSP	N-(2,5-dimethoxyphenyl)-4-methoxybenzamide	532276	CFFUCEHTAUTSAT-UHFFFAOYSA-N	NA	60.7	0.18	Matrix metalloproteinase 8	MMP8	P22894
TCMSP	N-(2,5-dimethoxyphenyl)-4-methoxybenzamide	532276	CFFUCEHTAUTSAT-UHFFFAOYSA-N	NA	60.7	0.18	Melanin-concentrating hormone receptor 1	MCHR1	Q99705
TCMSP	N-(2,5-dimethoxyphenyl)-4-methoxybenzamide	532276	CFFUCEHTAUTSAT-UHFFFAOYSA-N	NA	60.7	0.18	Trypsin I	PRSS1	P07477
TCMSP	N-(2,5-dimethoxyphenyl)-4-methoxybenzamide	532276	CFFUCEHTAUTSAT-UHFFFAOYSA-N	NA	60.7	0.18	Cyclin-dependent kinase 4/cyclin D1	CCND1 CDK4	P24385 P11802
TCMSP	N-(2,5-dimethoxyphenyl)-4-methoxybenzamide	532276	CFFUCEHTAUTSAT-UHFFFAOYSA-N	NA	60.7	0.18	Platelet-derived growth factor receptor alpha	PDGFRA	P16234
TCMSP	N-(2,5-dimethoxyphenyl)-4-methoxybenzamide	532276	CFFUCEHTAUTSAT-UHFFFAOYSA-N	NA	60.7	0.18	Acyl coenzyme A:cholesterol acyltransferase	CES1	P23141
TCMSP	N-(2,5-dimethoxyphenyl)-4-methoxybenzamide	532276	CFFUCEHTAUTSAT-UHFFFAOYSA-N	NA	60.7	0.18	Carboxylesterase 2	CES2	O00748
TCMSP	N-(2,5-dimethoxyphenyl)-4-methoxybenzamide	532276	CFFUCEHTAUTSAT-UHFFFAOYSA-N	NA	60.7	0.18	Serine/threonine-protein kinase PLK4	PLK4	O00444
TCMSP	N-(2,5-dimethoxyphenyl)-4-methoxybenzamide	532276	CFFUCEHTAUTSAT-UHFFFAOYSA-N	NA	60.7	0.18	Ephrin receptor	EPHB4	P54760
TCMSP	N-(2,5-dimethoxyphenyl)-4-methoxybenzamide	532276	CFFUCEHTAUTSAT-UHFFFAOYSA-N	NA	60.7	0.18	CDK8/Cyclin C	CCNC CDK8	P24863 P49336
TCMSP	N-(2,5-dimethoxyphenyl)-4-methoxybenzamide	532276	CFFUCEHTAUTSAT-UHFFFAOYSA-N	NA	60.7	0.18	Cell division protein kinase 8	CDK8	P49336
TCMSP	N-(2,5-dimethoxyphenyl)-4-methoxybenzamide	532276	CFFUCEHTAUTSAT-UHFFFAOYSA-N	NA	60.7	0.18	Tyrosine-protein kinase JAK3	JAK3	P52333
TCMSP	N-(2,5-dimethoxyphenyl)-4-methoxybenzamide	532276	CFFUCEHTAUTSAT-UHFFFAOYSA-N	NA	60.7	0.18	Caspase-3	CASP3	P42574
TCMSP	N-(2,5-dimethoxyphenyl)-4-methoxybenzamide	532276	CFFUCEHTAUTSAT-UHFFFAOYSA-N	NA	60.7	0.18	Myeloperoxidase	MPO	P05164
TCMSP	N-(2,5-dimethoxyphenyl)-4-methoxybenzamide	532276	CFFUCEHTAUTSAT-UHFFFAOYSA-N	NA	60.7	0.18	Protein-glutamine gamma-glutamyltransferase	TGM2	P21980
TCMSP	N-(2,5-dimethoxyphenyl)-4-methoxybenzamide	532276	CFFUCEHTAUTSAT-UHFFFAOYSA-N	NA	60.7	0.18	Protein-glutamine gamma-glutamyltransferase K	TGM1	P22735
TCMSP	N-(2,5-dimethoxyphenyl)-4-methoxybenzamide	532276	CFFUCEHTAUTSAT-UHFFFAOYSA-N	NA	60.7	0.18	Protein-glutamine glutamyltransferase E	TGM3	Q08188
TCMSP	N-(2,5-dimethoxyphenyl)-4-methoxybenzamide	532276	CFFUCEHTAUTSAT-UHFFFAOYSA-N	NA	60.7	0.18	Cyclin-dependent kinase 4	CDK4	P11802
TCMSP	N-(2,5-dimethoxyphenyl)-4-methoxybenzamide	532276	CFFUCEHTAUTSAT-UHFFFAOYSA-N	NA	60.7	0.18	p53-binding protein Mdm-2	MDM2	Q00987
TCMSP	N-(2,5-dimethoxyphenyl)-4-methoxybenzamide	532276	CFFUCEHTAUTSAT-UHFFFAOYSA-N	NA	60.7	0.18	Gamma-secretase	PSEN2 PSENEN NCSTN APH1A PSEN1 APH1B	P49810 Q9NZ42 Q92542 Q96BI3 P49768 Q8WW43
TCMSP	N-(2,5-dimethoxyphenyl)-4-methoxybenzamide	532276	CFFUCEHTAUTSAT-UHFFFAOYSA-N	NA	60.7	0.18	Vascular endothelial growth factor receptor 2	KDR	P35968
TCMSP	N-(2,5-dimethoxyphenyl)-4-methoxybenzamide	532276	CFFUCEHTAUTSAT-UHFFFAOYSA-N	NA	60.7	0.18	Carbonic anhydrase VI	CA6	P23280
TCMSP	N-(2,5-dimethoxyphenyl)-4-methoxybenzamide	532276	CFFUCEHTAUTSAT-UHFFFAOYSA-N	NA	60.7	0.18	Carbonic anhydrase XIII	CA13	Q8N1Q1
TCMSP	N-(2,5-dimethoxyphenyl)-4-methoxybenzamide	532276	CFFUCEHTAUTSAT-UHFFFAOYSA-N	NA	60.7	0.18	GABA-A receptor; alpha-3/beta-3/gamma-2	GABRB3 GABRA3 GABRG2	P28472 P34903 P18507
TCMSP	N-(2,5-dimethoxyphenyl)-4-methoxybenzamide	532276	CFFUCEHTAUTSAT-UHFFFAOYSA-N	NA	60.7	0.18	GABA-A receptor; alpha-1/beta-3/gamma-2	GABRB3 GABRG2 GABRA1	P28472 P18507 P14867
TCMSP	N-(2,5-dimethoxyphenyl)-4-methoxybenzamide	532276	CFFUCEHTAUTSAT-UHFFFAOYSA-N	NA	60.7	0.18	GABA-A receptor; alpha-5/beta-3/gamma-2	GABRB3 GABRG2 GABRA5	P28472 P18507 P31644
TCMSP	N-(2,5-dimethoxyphenyl)-4-methoxybenzamide	532276	CFFUCEHTAUTSAT-UHFFFAOYSA-N	NA	60.7	0.18	Potassium-transporting ATPase	ATP4B ATP4A	P51164 P20648
TCMSP	N-(2,5-dimethoxyphenyl)-4-methoxybenzamide	532276	CFFUCEHTAUTSAT-UHFFFAOYSA-N	NA	60.7	0.18	Platelet-derived growth factor receptor	PDGFRA PDGFRB	P16234 P09619
TCMSP	N-(2,5-dimethoxyphenyl)-4-methoxybenzamide	532276	CFFUCEHTAUTSAT-UHFFFAOYSA-N	NA	60.7	0.18	GABA-A receptor; alpha-6/beta-3/gamma-2	GABRG2 GABRB3 GABRA6	P18507 P28472 Q16445
TCMSP	N-(2,5-dimethoxyphenyl)-4-methoxybenzamide	532276	CFFUCEHTAUTSAT-UHFFFAOYSA-N	NA	60.7	0.18	Phosphoglycerate kinase 1	PGK1	P00558
TCMSP	N-(2,5-dimethoxyphenyl)-4-methoxybenzamide	532276	CFFUCEHTAUTSAT-UHFFFAOYSA-N	NA	60.7	0.18	Fatty acid synthase	FASN	P49327
TCMSP	N-(2,5-dimethoxyphenyl)-4-methoxybenzamide	532276	CFFUCEHTAUTSAT-UHFFFAOYSA-N	NA	60.7	0.18	Caspase-7	CASP7	P55210
TCMSP	N-(2,5-dimethoxyphenyl)-4-methoxybenzamide	532276	CFFUCEHTAUTSAT-UHFFFAOYSA-N	NA	60.7	0.18	Chymase	CMA1	P23946
TCMSP	N-(2,5-dimethoxyphenyl)-4-methoxybenzamide	532276	CFFUCEHTAUTSAT-UHFFFAOYSA-N	NA	60.7	0.18	MAP kinase signal-integrating kinase 2	MKNK2	Q9HBH9
TCMSP	N-(2,5-dimethoxyphenyl)-4-methoxybenzamide	532276	CFFUCEHTAUTSAT-UHFFFAOYSA-N	NA	60.7	0.18	MAP kinase-interacting serine/threonine-protein kinase MNK1	MKNK1	Q9BUB5
TCMSP	N-(2,5-dimethoxyphenyl)-4-methoxybenzamide	532276	CFFUCEHTAUTSAT-UHFFFAOYSA-N	NA	60.7	0.18	Serine/threonine-protein kinase WEE1	WEE1	P30291
TCMSP	N-(2,5-dimethoxyphenyl)-4-methoxybenzamide	532276	CFFUCEHTAUTSAT-UHFFFAOYSA-N	NA	60.7	0.18	UDP-N-acetylglucosamine--peptide N-acetylglucosaminyltransferase 110 kDa subunit	OGT	O15294
TCMSP	N-(2,5-dimethoxyphenyl)-4-methoxybenzamide	532276	CFFUCEHTAUTSAT-UHFFFAOYSA-N	NA	60.7	0.18	Inhibitor of nuclear factor kappa B kinase beta subunit	IKBKB	O14920
TCMSP	N-(2,5-dimethoxyphenyl)-4-methoxybenzamide	532276	CFFUCEHTAUTSAT-UHFFFAOYSA-N	NA	60.7	0.18	Steryl-sulfatase	STS	P08842
TCMSP	N-(2,5-dimethoxyphenyl)-4-methoxybenzamide	532276	CFFUCEHTAUTSAT-UHFFFAOYSA-N	NA	60.7	0.18	Quinone reductase 1	NQO1	P15559
TCMSP	N-(2,5-dimethoxyphenyl)-4-methoxybenzamide	532276	CFFUCEHTAUTSAT-UHFFFAOYSA-N	NA	60.7	0.18	ALK tyrosine kinase receptor	ALK	Q9UM73
TCMSP	N-(2,5-dimethoxyphenyl)-4-methoxybenzamide	532276	CFFUCEHTAUTSAT-UHFFFAOYSA-N	NA	60.7	0.18	Serine/threonine-protein kinase PIM3	PIM3	Q86V86
TCMSP	N-(2,5-dimethoxyphenyl)-4-methoxybenzamide	532276	CFFUCEHTAUTSAT-UHFFFAOYSA-N	NA	60.7	0.18	Receptor protein-tyrosine kinase erbB-2	ERBB2	P04626
TCMSP	N-(2,5-dimethoxyphenyl)-4-methoxybenzamide	532276	CFFUCEHTAUTSAT-UHFFFAOYSA-N	NA	60.7	0.18	Carnitine O-palmitoyltransferase 1, liver isoform	CPT1A	P50416
TCMSP	N-(2,5-dimethoxyphenyl)-4-methoxybenzamide	532276	CFFUCEHTAUTSAT-UHFFFAOYSA-N	NA	60.7	0.18	PI3-kinase p110-alpha/p85-alpha	PIK3CA PIK3R1	P42336 P27986
TCMSP	N-(2,5-dimethoxyphenyl)-4-methoxybenzamide	532276	CFFUCEHTAUTSAT-UHFFFAOYSA-N	NA	60.7	0.18	Proto-oncogene tyrosine-protein kinase MER	MERTK	Q12866
TCMSP	N-(2,5-dimethoxyphenyl)-4-methoxybenzamide	532276	CFFUCEHTAUTSAT-UHFFFAOYSA-N	NA	60.7	0.18	Bromodomain-containing protein 2	BRD2	P25440
TCMSP	N-(2,5-dimethoxyphenyl)-4-methoxybenzamide	532276	CFFUCEHTAUTSAT-UHFFFAOYSA-N	NA	60.7	0.18	MAP kinase-activated protein kinase 2	MAPKAPK2	P49137
TCMSP	N-(2,5-dimethoxyphenyl)-4-methoxybenzamide	532276	CFFUCEHTAUTSAT-UHFFFAOYSA-N	NA	60.7	0.18	Cyclin-dependent kinase 1	CDK1	P06493
TCMSP	N-(2,5-dimethoxyphenyl)-4-methoxybenzamide	532276	CFFUCEHTAUTSAT-UHFFFAOYSA-N	NA	60.7	0.18	Rho-associated protein kinase 1	ROCK1	Q13464
TCMSP	N-(2,5-dimethoxyphenyl)-4-methoxybenzamide	532276	CFFUCEHTAUTSAT-UHFFFAOYSA-N	NA	60.7	0.18	Orexin receptor 2	HCRTR2	O43614
TCMSP	N-(2,5-dimethoxyphenyl)-4-methoxybenzamide	532276	CFFUCEHTAUTSAT-UHFFFAOYSA-N	NA	60.7	0.18	Orexin receptor 1	HCRTR1	O43613
TCMSP	N-(2,5-dimethoxyphenyl)-4-methoxybenzamide	532276	CFFUCEHTAUTSAT-UHFFFAOYSA-N	NA	60.7	0.18	Rho-associated protein kinase 2	ROCK2	O75116
TCMSP	N-(2,5-dimethoxyphenyl)-4-methoxybenzamide	532276	CFFUCEHTAUTSAT-UHFFFAOYSA-N	NA	60.7	0.18	Serotonin 3a (5-HT3a) receptor (by homology)	HTR3A	P46098
TCMSP	N-(2,5-dimethoxyphenyl)-4-methoxybenzamide	532276	CFFUCEHTAUTSAT-UHFFFAOYSA-N	NA	60.7	0.18	Tyrosine-protein kinase HCK	HCK	P08631
TCMSP	sesamin	72307	PEYUIKBAABKQKQ-AFHBHXEDSA-N	607-80-7	56.55	0.83	Induced myeloid leukemia cell differentiation protein Mcl-1	MCL1	Q07820
TCMSP	sesamin	72307	PEYUIKBAABKQKQ-AFHBHXEDSA-N	607-80-7	56.55	0.83	c-Jun N-terminal kinase 2	MAPK9	P45984
TCMSP	sesamin	72307	PEYUIKBAABKQKQ-AFHBHXEDSA-N	607-80-7	56.55	0.83	Arachidonate 5-lipoxygenase	ALOX5	P09917
TCMSP	sesamin	72307	PEYUIKBAABKQKQ-AFHBHXEDSA-N	607-80-7	56.55	0.83	Sodium/glucose cotransporter 2	SLC5A2	P31639
TCMSP	sesamin	72307	PEYUIKBAABKQKQ-AFHBHXEDSA-N	607-80-7	56.55	0.83	Norepinephrine transporter	SLC6A2	P23975
TCMSP	sesamin	72307	PEYUIKBAABKQKQ-AFHBHXEDSA-N	607-80-7	56.55	0.83	Dopamine transporter	SLC6A3	Q01959
TCMSP	sesamin	72307	PEYUIKBAABKQKQ-AFHBHXEDSA-N	607-80-7	56.55	0.83	Platelet activating factor receptor	PTAFR	P25105
TCMSP	sesamin	72307	PEYUIKBAABKQKQ-AFHBHXEDSA-N	607-80-7	56.55	0.83	Acyl coenzyme A:cholesterol acyltransferase 1	SOAT1	P35610
TCMSP	sesamin	72307	PEYUIKBAABKQKQ-AFHBHXEDSA-N	607-80-7	56.55	0.83	Acyl coenzyme A:cholesterol acyltransferase 2	SOAT2	O75908
TCMSP	sesamin	72307	PEYUIKBAABKQKQ-AFHBHXEDSA-N	607-80-7	56.55	0.83	Hypoxia-inducible factor 1 alpha (by homology)	HIF1A	Q16665
TCMSP	sesamin	72307	PEYUIKBAABKQKQ-AFHBHXEDSA-N	607-80-7	56.55	0.83	Free fatty acid receptor 1	FFAR1	O14842
TCMSP	(-)-Epieudesmin	7299790	PEUUVVGQIVMSAW-AJAKECSLSA-N	4375-03_5	52.35	0.62	Platelet activating factor receptor	PTAFR	P25105
TCMSP	(-)-Epieudesmin	7299790	PEUUVVGQIVMSAW-AJAKECSLSA-N	4375-03_5	52.35	0.62	Induced myeloid leukemia cell differentiation protein Mcl-1	MCL1	Q07820
TCMSP	(-)-Epieudesmin	7299790	PEUUVVGQIVMSAW-AJAKECSLSA-N	4375-03_5	52.35	0.62	Arachidonate 5-lipoxygenase	ALOX5	P09917
TCMSP	(-)-Epieudesmin	7299790	PEUUVVGQIVMSAW-AJAKECSLSA-N	4375-03_5	52.35	0.62	c-Jun N-terminal kinase 2	MAPK9	P45984
TCMSP	(-)-Epieudesmin	7299790	PEUUVVGQIVMSAW-AJAKECSLSA-N	4375-03_5	52.35	0.62	Acyl coenzyme A:cholesterol acyltransferase 2	SOAT2	O75908
TCMSP	(-)-Epieudesmin	7299790	PEUUVVGQIVMSAW-AJAKECSLSA-N	4375-03_5	52.35	0.62	Testis-specific androgen-binding protein	SHBG	P04278
TCMSP	(-)-Epieudesmin	7299790	PEUUVVGQIVMSAW-AJAKECSLSA-N	4375-03_5	52.35	0.62	Serotonin transporter	SLC6A4	P31645
TCMSP	(-)-Epieudesmin	7299790	PEUUVVGQIVMSAW-AJAKECSLSA-N	4375-03_5	52.35	0.62	Hypoxia-inducible factor 1 alpha	HIF1A	Q16665
TCMSP	(-)-Epieudesmin	7299790	PEUUVVGQIVMSAW-AJAKECSLSA-N	4375-03_5	52.35	0.62	Glycogen synthase kinase-3 beta	GSK3B	P49841
TCMSP	(-)-Epieudesmin	7299790	PEUUVVGQIVMSAW-AJAKECSLSA-N	4375-03_5	52.35	0.62	p53-binding protein Mdm-2	MDM2	Q00987
TCMSP	(-)-Epieudesmin	7299790	PEUUVVGQIVMSAW-AJAKECSLSA-N	4375-03_5	52.35	0.62	Phosphodiesterase 10A	PDE10A	Q9Y233
TCMSP	(-)-Epieudesmin	7299790	PEUUVVGQIVMSAW-AJAKECSLSA-N	4375-03_5	52.35	0.62	Sodium channel protein type IX alpha subunit	SCN9A	Q15858
TCMSP	(-)-Epieudesmin	7299790	PEUUVVGQIVMSAW-AJAKECSLSA-N	4375-03_5	52.35	0.62	c-Jun N-terminal kinase 1	MAPK8	P45983
TCMSP	(-)-Epieudesmin	7299790	PEUUVVGQIVMSAW-AJAKECSLSA-N	4375-03_5	52.35	0.62	c-Jun N-terminal kinase 3	MAPK10	P53779
TCMSP	(-)-Epieudesmin	7299790	PEUUVVGQIVMSAW-AJAKECSLSA-N	4375-03_5	52.35	0.62	TAK1/TAB1	TAB1 MAP3K7	Q15750 O43318
TCMSP	(-)-Epieudesmin	7299790	PEUUVVGQIVMSAW-AJAKECSLSA-N	4375-03_5	52.35	0.62	Serine/threonine-protein kinase mTOR	MTOR	P42345
TCMSP	(-)-Epieudesmin	7299790	PEUUVVGQIVMSAW-AJAKECSLSA-N	4375-03_5	52.35	0.62	PI3-kinase p110-alpha subunit	PIK3CA	P42336
TCMSP	(-)-Epieudesmin	7299790	PEUUVVGQIVMSAW-AJAKECSLSA-N	4375-03_5	52.35	0.62	Voltage-gated potassium channel subunit Kv1.5	KCNA5	P22460
TCMSP	(-)-Epieudesmin	7299790	PEUUVVGQIVMSAW-AJAKECSLSA-N	4375-03_5	52.35	0.62	Acyl coenzyme A:cholesterol acyltransferase 1	SOAT1	P35610
TCMSP	(-)-Epieudesmin	7299790	PEUUVVGQIVMSAW-AJAKECSLSA-N	4375-03_5	52.35	0.62	Glycine transporter 1	SLC6A9	P48067
TCMSP	(-)-Epieudesmin	7299790	PEUUVVGQIVMSAW-AJAKECSLSA-N	4375-03_5	52.35	0.62	Phosphodiesterase 5A	PDE5A	O76074
TCMSP	(-)-Epieudesmin	7299790	PEUUVVGQIVMSAW-AJAKECSLSA-N	4375-03_5	52.35	0.62	Sodium/glucose cotransporter 2	SLC5A2	P31639
TCMSP	(-)-Epieudesmin	7299790	PEUUVVGQIVMSAW-AJAKECSLSA-N	4375-03_5	52.35	0.62	LDL-associated phospholipase A2	PLA2G7	Q13093
TCMSP	(-)-Epieudesmin	7299790	PEUUVVGQIVMSAW-AJAKECSLSA-N	4375-03_5	52.35	0.62	C-C chemokine receptor type 1	CCR1	P32246
TCMSP	(-)-Epieudesmin	7299790	PEUUVVGQIVMSAW-AJAKECSLSA-N	4375-03_5	52.35	0.62	GABA-A receptor; alpha-3/beta-3/gamma-2	GABRB3 GABRA3 GABRG2	P28472 P34903 P18507
TCMSP	(-)-Epieudesmin	7299790	PEUUVVGQIVMSAW-AJAKECSLSA-N	4375-03_5	52.35	0.62	GABA-A receptor; alpha-1/beta-3/gamma-2	GABRB3 GABRG2 GABRA1	P28472 P18507 P14867
TCMSP	(-)-Epieudesmin	7299790	PEUUVVGQIVMSAW-AJAKECSLSA-N	4375-03_5	52.35	0.62	GABA-A receptor; alpha-5/beta-3/gamma-2	GABRB3 GABRG2 GABRA5	P28472 P18507 P31644
TCMSP	(-)-Epieudesmin	7299790	PEUUVVGQIVMSAW-AJAKECSLSA-N	4375-03_5	52.35	0.62	GABA-A receptor; alpha-2/beta-3/gamma-2	GABRA2 GABRB3 GABRG2	P47869 P28472 P18507
TCMSP	(-)-Epieudesmin	7299790	PEUUVVGQIVMSAW-AJAKECSLSA-N	4375-03_5	52.35	0.62	Prostanoid EP3 receptor	PTGER3	P43115
TCMSP	(-)-Epieudesmin	7299790	PEUUVVGQIVMSAW-AJAKECSLSA-N	4375-03_5	52.35	0.62	Corticotropin releasing factor receptor 1 (by homology)	CRHR1	P34998
TCMSP	(-)-Epieudesmin	7299790	PEUUVVGQIVMSAW-AJAKECSLSA-N	4375-03_5	52.35	0.62	Adenosine A2a receptor (by homology)	ADORA2A	P29274
TCMSP	(-)-Epieudesmin	7299790	PEUUVVGQIVMSAW-AJAKECSLSA-N	4375-03_5	52.35	0.62	Chymase	CMA1	P23946
TCMSP	(-)-Epieudesmin	7299790	PEUUVVGQIVMSAW-AJAKECSLSA-N	4375-03_5	52.35	0.62	Apoptosis regulator Bcl-X	BCL2L1	Q07817
TCMSP	(-)-Epieudesmin	7299790	PEUUVVGQIVMSAW-AJAKECSLSA-N	4375-03_5	52.35	0.62	Glucose-dependent insulinotropic receptor	GPR119	Q8TDV5
TCMSP	(-)-Epieudesmin	7299790	PEUUVVGQIVMSAW-AJAKECSLSA-N	4375-03_5	52.35	0.62	Tyrosine kinase non-receptor protein 2	TNK2	Q07912
TCMSP	(-)-Epieudesmin	7299790	PEUUVVGQIVMSAW-AJAKECSLSA-N	4375-03_5	52.35	0.62	Tyrosine-protein kinase SYK	SYK	P43405
TCMSP	(-)-Epieudesmin	7299790	PEUUVVGQIVMSAW-AJAKECSLSA-N	4375-03_5	52.35	0.62	Dual specificity protein kinase TTK	TTK	P33981
TCMSP	(-)-Epieudesmin	7299790	PEUUVVGQIVMSAW-AJAKECSLSA-N	4375-03_5	52.35	0.62	CDK8/Cyclin C	CCNC CDK8	P24863 P49336
TCMSP	(-)-Epieudesmin	7299790	PEUUVVGQIVMSAW-AJAKECSLSA-N	4375-03_5	52.35	0.62	Cell division protein kinase 8	CDK8	P49336
TCMSP	(-)-Epieudesmin	7299790	PEUUVVGQIVMSAW-AJAKECSLSA-N	4375-03_5	52.35	0.62	Ribosomal protein S6 kinase 1	RPS6KB1	P23443
TCMSP	(-)-Epieudesmin	7299790	PEUUVVGQIVMSAW-AJAKECSLSA-N	4375-03_5	52.35	0.62	Serine/threonine-protein kinase Aurora-A	AURKA	O14965
TCMSP	(-)-Epieudesmin	7299790	PEUUVVGQIVMSAW-AJAKECSLSA-N	4375-03_5	52.35	0.62	Tyrosine-protein kinase JAK3	JAK3	P52333
TCMSP	(-)-Epieudesmin	7299790	PEUUVVGQIVMSAW-AJAKECSLSA-N	4375-03_5	52.35	0.62	Tyrosine-protein kinase JAK1	JAK1	P23458
TCMSP	(-)-Epieudesmin	7299790	PEUUVVGQIVMSAW-AJAKECSLSA-N	4375-03_5	52.35	0.62	3-phosphoinositide dependent protein kinase-1	PDPK1	O15530
TCMSP	(-)-Epieudesmin	7299790	PEUUVVGQIVMSAW-AJAKECSLSA-N	4375-03_5	52.35	0.62	PI3-kinase p110-delta subunit	PIK3CD	O00329
TCMSP	(-)-Epieudesmin	7299790	PEUUVVGQIVMSAW-AJAKECSLSA-N	4375-03_5	52.35	0.62	Adenosine kinase	ADK	P55263
TCMSP	(-)-Epieudesmin	7299790	PEUUVVGQIVMSAW-AJAKECSLSA-N	4375-03_5	52.35	0.62	Dihydrofolate reductase	DHFR	P00374
TCMSP	(-)-Epieudesmin	7299790	PEUUVVGQIVMSAW-AJAKECSLSA-N	4375-03_5	52.35	0.62	Methionine aminopeptidase 2	METAP2	P50579
TCMSP	(-)-Epieudesmin	7299790	PEUUVVGQIVMSAW-AJAKECSLSA-N	4375-03_5	52.35	0.62	Muscle glycogen synthase	GYS1	P13807
TCMSP	(-)-Epieudesmin	7299790	PEUUVVGQIVMSAW-AJAKECSLSA-N	4375-03_5	52.35	0.62	Receptor protein-tyrosine kinase erbB-2	ERBB2	P04626
TCMSP	(-)-Epieudesmin	7299790	PEUUVVGQIVMSAW-AJAKECSLSA-N	4375-03_5	52.35	0.62	MAP kinase signal-integrating kinase 2	MKNK2	Q9HBH9
TCMSP	(-)-Epieudesmin	7299790	PEUUVVGQIVMSAW-AJAKECSLSA-N	4375-03_5	52.35	0.62	Platelet-derived growth factor receptor beta	PDGFRB	P09619
TCMSP	(-)-Epieudesmin	7299790	PEUUVVGQIVMSAW-AJAKECSLSA-N	4375-03_5	52.35	0.62	Thromboxane-A synthase	TBXAS1	P24557
TCMSP	(-)-Epieudesmin	7299790	PEUUVVGQIVMSAW-AJAKECSLSA-N	4375-03_5	52.35	0.62	Orexin receptor 2	HCRTR2	O43614
TCMSP	(-)-Epieudesmin	7299790	PEUUVVGQIVMSAW-AJAKECSLSA-N	4375-03_5	52.35	0.62	Orexin receptor 1	HCRTR1	O43613
TCMSP	(-)-Epieudesmin	7299790	PEUUVVGQIVMSAW-AJAKECSLSA-N	4375-03_5	52.35	0.62	Dual specificity protein kinase CLK4	CLK4	Q9HAZ1
TCMSP	(-)-Epieudesmin	7299790	PEUUVVGQIVMSAW-AJAKECSLSA-N	4375-03_5	52.35	0.62	Dual specificty protein kinase CLK1	CLK1	P49759
TCMSP	(-)-Epieudesmin	7299790	PEUUVVGQIVMSAW-AJAKECSLSA-N	4375-03_5	52.35	0.62	Dual specificity protein kinase CLK2	CLK2	P49760
TCMSP	(-)-Epieudesmin	7299790	PEUUVVGQIVMSAW-AJAKECSLSA-N	4375-03_5	52.35	0.62	Dual specificity protein kinase CLK3	CLK3	P49761
TCMSP	(-)-Epieudesmin	7299790	PEUUVVGQIVMSAW-AJAKECSLSA-N	4375-03_5	52.35	0.62	Endothelial lipase	LIPG	Q9Y5X9
TCMSP	(-)-Epieudesmin	7299790	PEUUVVGQIVMSAW-AJAKECSLSA-N	4375-03_5	52.35	0.62	Dual specificity tyrosine-phosphorylation-regulated kinase 1B	DYRK1B	Q9Y463
TCMSP	(-)-Epieudesmin	7299790	PEUUVVGQIVMSAW-AJAKECSLSA-N	4375-03_5	52.35	0.62	Cytochrome P450 11B1	CYP11B1	P15538
TCMSP	(-)-Epieudesmin	7299790	PEUUVVGQIVMSAW-AJAKECSLSA-N	4375-03_5	52.35	0.62	Caspase-3	CASP3	P42574
TCMSP	(-)-Epieudesmin	7299790	PEUUVVGQIVMSAW-AJAKECSLSA-N	4375-03_5	52.35	0.62	Cytochrome P450 11B2	CYP11B2	P19099
TCMSP	(-)-Epieudesmin	7299790	PEUUVVGQIVMSAW-AJAKECSLSA-N	4375-03_5	52.35	0.62	Caspase-7	CASP7	P55210
TCMSP	(-)-Epieudesmin	7299790	PEUUVVGQIVMSAW-AJAKECSLSA-N	4375-03_5	52.35	0.62	Plectin	PLEC	Q15149
TCMSP	(-)-Epieudesmin	7299790	PEUUVVGQIVMSAW-AJAKECSLSA-N	4375-03_5	52.35	0.62	Phosphodiesterase 8B	PDE8B	O95263
TCMSP	(-)-Epieudesmin	7299790	PEUUVVGQIVMSAW-AJAKECSLSA-N	4375-03_5	52.35	0.62	Serine/threonine-protein kinase B-raf	BRAF	P15056
TCMSP	(-)-Epieudesmin	7299790	PEUUVVGQIVMSAW-AJAKECSLSA-N	4375-03_5	52.35	0.62	Dopamine transporter	SLC6A3	Q01959
TCMSP	(-)-Epieudesmin	7299790	PEUUVVGQIVMSAW-AJAKECSLSA-N	4375-03_5	52.35	0.62	Prostanoid EP1 receptor	PTGER1	P34995
TCMSP	(-)-Epieudesmin	7299790	PEUUVVGQIVMSAW-AJAKECSLSA-N	4375-03_5	52.35	0.62	Casein kinase I alpha	CSNK1A1	P48729
TCMSP	sylvatine	90472536	URFYPQQKBYOWIX-UDNGMWKQSA-N	42438-80-2	44	0.51	Monoamine oxidase B	MAOB	P27338
TCMSP	sylvatine	90472536	URFYPQQKBYOWIX-UDNGMWKQSA-N	42438-80-2	44	0.51	Acyl coenzyme A:cholesterol acyltransferase 1	SOAT1	P35610
TCMSP	sylvatine	90472536	URFYPQQKBYOWIX-UDNGMWKQSA-N	42438-80-2	44	0.51	Sigma opioid receptor	SIGMAR1	Q99720
TCMSP	sylvatine	90472536	URFYPQQKBYOWIX-UDNGMWKQSA-N	42438-80-2	44	0.51	Acyl coenzyme A:cholesterol acyltransferase	CES1	P23141
TCMSP	sylvatine	90472536	URFYPQQKBYOWIX-UDNGMWKQSA-N	42438-80-2	44	0.51	Sn1-specific diacylglycerol lipase alpha	DAGLA	Q9Y4D2
TCMSP	sylvatine	90472536	URFYPQQKBYOWIX-UDNGMWKQSA-N	42438-80-2	44	0.51	Tyrosine-protein kinase ITK/TSK	ITK	Q08881
TCMSP	sylvatine	90472536	URFYPQQKBYOWIX-UDNGMWKQSA-N	42438-80-2	44	0.51	Rho-associated protein kinase 2	ROCK2	O75116
TCMSP	sylvatine	90472536	URFYPQQKBYOWIX-UDNGMWKQSA-N	42438-80-2	44	0.51	Phospholipase A2 group IIA	PLA2G2A	P14555
TCMSP	sylvatine	90472536	URFYPQQKBYOWIX-UDNGMWKQSA-N	42438-80-2	44	0.51	Cytosolic phospholipase A2	PLA2G4A	P47712
TCMSP	(E,E,E)-11-(1,3-Benzodioxol-5-yl)-N-(2-methylpropyl)-2,4,10-undecatrienenamide	6453083	ZNCPOBHLRPYOHA-KKSZINRNSA-N	54794-74-0	42.72	0.43	Acyl coenzyme A:cholesterol acyltransferase 1	SOAT1	P35610
TCMSP	(E,E,E)-11-(1,3-Benzodioxol-5-yl)-N-(2-methylpropyl)-2,4,10-undecatrienenamide	6453083	ZNCPOBHLRPYOHA-KKSZINRNSA-N	54794-74-0	42.72	0.43	Histone deacetylase 1	HDAC1	Q13547
TCMSP	(E,E,E)-11-(1,3-Benzodioxol-5-yl)-N-(2-methylpropyl)-2,4,10-undecatrienenamide	6453083	ZNCPOBHLRPYOHA-KKSZINRNSA-N	54794-74-0	42.72	0.43	Histone deacetylase 3	HDAC3	O15379
TCMSP	(E,E,E)-11-(1,3-Benzodioxol-5-yl)-N-(2-methylpropyl)-2,4,10-undecatrienenamide	6453083	ZNCPOBHLRPYOHA-KKSZINRNSA-N	54794-74-0	42.72	0.43	Monoamine oxidase B	MAOB	P27338
TCMSP	(E,E,E)-11-(1,3-Benzodioxol-5-yl)-N-(2-methylpropyl)-2,4,10-undecatrienenamide	6453083	ZNCPOBHLRPYOHA-KKSZINRNSA-N	54794-74-0	42.72	0.43	Histone deacetylase 6	HDAC6	Q9UBN7
TCMSP	(E,E,E)-11-(1,3-Benzodioxol-5-yl)-N-(2-methylpropyl)-2,4,10-undecatrienenamide	6453083	ZNCPOBHLRPYOHA-KKSZINRNSA-N	54794-74-0	42.72	0.43	Aldehyde dehydrogenase	ALDH2	P05091
TCMSP	(E,E,E)-11-(1,3-Benzodioxol-5-yl)-N-(2-methylpropyl)-2,4,10-undecatrienenamide	6453083	ZNCPOBHLRPYOHA-KKSZINRNSA-N	54794-74-0	42.72	0.43	Acetyl-CoA carboxylase 2	ACACB	O00763
TCMSP	(E,E,E)-11-(1,3-Benzodioxol-5-yl)-N-(2-methylpropyl)-2,4,10-undecatrienenamide	6453083	ZNCPOBHLRPYOHA-KKSZINRNSA-N	54794-74-0	42.72	0.43	Serine/threonine-protein kinase Aurora-B	AURKB	Q96GD4
TCMSP	(E,E,E)-11-(1,3-Benzodioxol-5-yl)-N-(2-methylpropyl)-2,4,10-undecatrienenamide	6453083	ZNCPOBHLRPYOHA-KKSZINRNSA-N	54794-74-0	42.72	0.43	Vascular endothelial growth factor receptor 2	KDR	P35968
TCMSP	pipernonaline	9974595	PKLGRWSJBLGIBF-JMQWPVDRSA-N	88660-10-0	51.32	0.41	Acyl coenzyme A:cholesterol acyltransferase 1	SOAT1	P35610
TCMSP	pipernonaline	9974595	PKLGRWSJBLGIBF-JMQWPVDRSA-N	88660-10-0	51.32	0.41	Monoamine oxidase B	MAOB	P27338
TCMSP	pipernonaline	9974595	PKLGRWSJBLGIBF-JMQWPVDRSA-N	88660-10-0	51.32	0.41	NAD-dependent deacetylase sirtuin 3	SIRT3	Q9NTG7
TCMSP	pipernonaline	9974595	PKLGRWSJBLGIBF-JMQWPVDRSA-N	88660-10-0	51.32	0.41	NAD-dependent deacetylase sirtuin 2	SIRT2	Q8IXJ6
TCMSP	pipernonaline	9974595	PKLGRWSJBLGIBF-JMQWPVDRSA-N	88660-10-0	51.32	0.41	Inhibitor of nuclear factor kappa B kinase beta subunit	IKBKB	O14920
TCMSP	pipernonaline	9974595	PKLGRWSJBLGIBF-JMQWPVDRSA-N	88660-10-0	51.32	0.41	Calcitonin-gene-related peptide receptor, CALCRL/RAMP1	CALCRL RAMP1	Q16602 O60894
TCMSP	pipernonaline	9974595	PKLGRWSJBLGIBF-JMQWPVDRSA-N	88660-10-0	51.32	0.41	Acetyl-CoA carboxylase 2	ACACB	O00763
TCMSP	pipernonaline	9974595	PKLGRWSJBLGIBF-JMQWPVDRSA-N	88660-10-0	51.32	0.41	Adenosine A2a receptor	ADORA2A	P29274
TCMSP	pipernonaline	9974595	PKLGRWSJBLGIBF-JMQWPVDRSA-N	88660-10-0	51.32	0.41	Thrombin	F2	P00734
TCMSP	pipernonaline	9974595	PKLGRWSJBLGIBF-JMQWPVDRSA-N	88660-10-0	51.32	0.41	Acetyl-CoA carboxylase 1	ACACA	Q13085
TCMSP	pipernonaline	9974595	PKLGRWSJBLGIBF-JMQWPVDRSA-N	88660-10-0	51.32	0.41	Anandamide amidohydrolase	FAAH	O00519
TCMSP	pipernonaline	9974595	PKLGRWSJBLGIBF-JMQWPVDRSA-N	88660-10-0	51.32	0.41	Phosphodiesterase 5A	PDE5A	O76074
TCMSP	pipernonaline	9974595	PKLGRWSJBLGIBF-JMQWPVDRSA-N	88660-10-0	51.32	0.41	Phosphodiesterase 3	PDE3A	Q14432
TCMSP	pipernonaline	9974595	PKLGRWSJBLGIBF-JMQWPVDRSA-N	88660-10-0	51.32	0.41	Phosphodiesterase 3B	PDE3B	Q13370
TCMSP	pipernonaline	9974595	PKLGRWSJBLGIBF-JMQWPVDRSA-N	88660-10-0	51.32	0.41	Acetylcholinesterase	ACHE	P22303
TCMSP	pipernonaline	9974595	PKLGRWSJBLGIBF-JMQWPVDRSA-N	88660-10-0	51.32	0.41	Nicotinamide phosphoribosyltransferase	NAMPT	P43490
TCMSP	pipernonaline	9974595	PKLGRWSJBLGIBF-JMQWPVDRSA-N	88660-10-0	51.32	0.41	Platelet-derived growth factor receptor beta	PDGFRB	P09619
TCMSP	pipernonaline	9974595	PKLGRWSJBLGIBF-JMQWPVDRSA-N	88660-10-0	51.32	0.41	Vascular endothelial growth factor receptor 2	KDR	P35968
TCMSP	pipernonaline	9974595	PKLGRWSJBLGIBF-JMQWPVDRSA-N	88660-10-0	51.32	0.41	Metabotropic glutamate receptor 2	GRM2	Q14416
TCMSP	pipernonaline	9974595	PKLGRWSJBLGIBF-JMQWPVDRSA-N	88660-10-0	51.32	0.41	Epoxide hydrolase 1	EPHX1	P07099
TCMSP	pipernonaline	9974595	PKLGRWSJBLGIBF-JMQWPVDRSA-N	88660-10-0	51.32	0.41	Epoxide hydratase	EPHX2	P34913
TCMSP	pipernonaline	9974595	PKLGRWSJBLGIBF-JMQWPVDRSA-N	88660-10-0	51.32	0.41	Calcitonin gene-related peptide type 1 receptor	CALCRL	Q16602
TCMSP	pipernonaline	9974595	PKLGRWSJBLGIBF-JMQWPVDRSA-N	88660-10-0	51.32	0.41	Sigma opioid receptor	SIGMAR1	Q99720
TCMSP	pipernonaline	9974595	PKLGRWSJBLGIBF-JMQWPVDRSA-N	88660-10-0	51.32	0.41	Acyl-CoA desaturase	SCD	O00767
TCMSP	pipernonaline	9974595	PKLGRWSJBLGIBF-JMQWPVDRSA-N	88660-10-0	51.32	0.41	Serine/threonine-protein kinase Chk2	CHEK2	O96017
TCMSP	dehydropipernonaline	6439947	KAYVDASZRFLFRZ-PQECNABGSA-N	107584-38-3	47.73	0.41	Acyl coenzyme A:cholesterol acyltransferase 1	SOAT1	P35610
TCMSP	dehydropipernonaline	6439947	KAYVDASZRFLFRZ-PQECNABGSA-N	107584-38-3	47.73	0.41	Monoamine oxidase B	MAOB	P27338
TCMSP	dehydropipernonaline	6439947	KAYVDASZRFLFRZ-PQECNABGSA-N	107584-38-3	47.73	0.41	Sigma opioid receptor	SIGMAR1	Q99720
TCMSP	dehydropipernonaline	6439947	KAYVDASZRFLFRZ-PQECNABGSA-N	107584-38-3	47.73	0.41	Histone deacetylase 1	HDAC1	Q13547
TCMSP	dehydropipernonaline	6439947	KAYVDASZRFLFRZ-PQECNABGSA-N	107584-38-3	47.73	0.41	Histone deacetylase 6	HDAC6	Q9UBN7
TCMSP	dehydropipernonaline	6439947	KAYVDASZRFLFRZ-PQECNABGSA-N	107584-38-3	47.73	0.41	Nicotinamide phosphoribosyltransferase	NAMPT	P43490
TCMSP	dehydropipernonaline	6439947	KAYVDASZRFLFRZ-PQECNABGSA-N	107584-38-3	47.73	0.41	Acetyl-CoA carboxylase 2	ACACB	O00763
TCMSP	dehydropipernonaline	6439947	KAYVDASZRFLFRZ-PQECNABGSA-N	107584-38-3	47.73	0.41	Calcitonin-gene-related peptide receptor, CALCRL/RAMP1	CALCRL RAMP1	Q16602 O60894
TCMSP	dehydropipernonaline	6439947	KAYVDASZRFLFRZ-PQECNABGSA-N	107584-38-3	47.73	0.41	NAD-dependent deacetylase sirtuin 3	SIRT3	Q9NTG7
TCMSP	dehydropipernonaline	6439947	KAYVDASZRFLFRZ-PQECNABGSA-N	107584-38-3	47.73	0.41	NAD-dependent deacetylase sirtuin 2	SIRT2	Q8IXJ6
TCMSP	dehydropipernonaline	6439947	KAYVDASZRFLFRZ-PQECNABGSA-N	107584-38-3	47.73	0.41	Inhibitor of nuclear factor kappa B kinase beta subunit	IKBKB	O14920
TCMSP	dehydropipernonaline	6439947	KAYVDASZRFLFRZ-PQECNABGSA-N	107584-38-3	47.73	0.41	Adenosine A2a receptor	ADORA2A	P29274
TCMSP	dehydropipernonaline	6439947	KAYVDASZRFLFRZ-PQECNABGSA-N	107584-38-3	47.73	0.41	Histone deacetylase 3	HDAC3	O15379
TCMSP	dehydropipernonaline	6439947	KAYVDASZRFLFRZ-PQECNABGSA-N	107584-38-3	47.73	0.41	Tyrosine-protein kinase receptor FLT3	FLT3	P36888
TCMSP	dehydropipernonaline	6439947	KAYVDASZRFLFRZ-PQECNABGSA-N	107584-38-3	47.73	0.41	Probable protein-cysteine N-palmitoyltransferase porcupine	PORCN	Q9H237
TCMSP	dehydropipernonaline	6439947	KAYVDASZRFLFRZ-PQECNABGSA-N	107584-38-3	47.73	0.41	Epoxide hydrolase 1	EPHX1	P07099
TCMSP	dehydropipernonaline	6439947	KAYVDASZRFLFRZ-PQECNABGSA-N	107584-38-3	47.73	0.41	Epoxide hydratase	EPHX2	P34913
TCMSP	dehydropipernonaline	6439947	KAYVDASZRFLFRZ-PQECNABGSA-N	107584-38-3	47.73	0.41	Platelet-derived growth factor receptor beta	PDGFRB	P09619
TCMSP	dehydropipernonaline	6439947	KAYVDASZRFLFRZ-PQECNABGSA-N	107584-38-3	47.73	0.41	Vascular endothelial growth factor receptor 2	KDR	P35968
TCMSP	dehydropipernonaline	6439947	KAYVDASZRFLFRZ-PQECNABGSA-N	107584-38-3	47.73	0.41	Thrombin	F2	P00734
TCMSP	dehydropipernonaline	6439947	KAYVDASZRFLFRZ-PQECNABGSA-N	107584-38-3	47.73	0.41	Calcitonin gene-related peptide type 1 receptor	CALCRL	Q16602
TCMSP	dehydropipernonaline	6439947	KAYVDASZRFLFRZ-PQECNABGSA-N	107584-38-3	47.73	0.41	Perforin-1	PRF1	P14222
TCMSP	dehydropipernonaline	6439947	KAYVDASZRFLFRZ-PQECNABGSA-N	107584-38-3	47.73	0.41	Histamine H1 receptor	HRH1	P35367
TCMSP	dehydropipernonaline	6439947	KAYVDASZRFLFRZ-PQECNABGSA-N	107584-38-3	47.73	0.41	Acetyl-CoA carboxylase 1	ACACA	Q13085
TCMSP	dehydropipernonaline	6439947	KAYVDASZRFLFRZ-PQECNABGSA-N	107584-38-3	47.73	0.41	Serine/threonine-protein kinase B-raf	BRAF	P15056
TCMSP	dehydropipernonaline	6439947	KAYVDASZRFLFRZ-PQECNABGSA-N	107584-38-3	47.73	0.41	Acid ceramidase	ASAH1	Q13510
TCMSP	dehydropipernonaline	6439947	KAYVDASZRFLFRZ-PQECNABGSA-N	107584-38-3	47.73	0.41	Phosphodiesterase 10A	PDE10A	Q9Y233
TCMSP	dehydropipernonaline	6439947	KAYVDASZRFLFRZ-PQECNABGSA-N	107584-38-3	47.73	0.41	Acyl-CoA desaturase	SCD	O00767
TCMSP	dehydropipernonaline	6439947	KAYVDASZRFLFRZ-PQECNABGSA-N	107584-38-3	47.73	0.41	Steryl-sulfatase	STS	P08842
TCMSP	dehydropipernonaline	6439947	KAYVDASZRFLFRZ-PQECNABGSA-N	107584-38-3	47.73	0.41	Sn1-specific diacylglycerol lipase alpha	DAGLA	Q9Y4D2
TCMSP	(2E,8E)-Piperamide-C9:2	131752411	BYKNKNBUHGFXQF-VTBWALSUSA-N	117137-67-4	49.43	0.36	Monoamine oxidase B	MAOB	P27338
TCMSP	(2E,8E)-Piperamide-C9:2	131752411	BYKNKNBUHGFXQF-VTBWALSUSA-N	117137-67-4	49.43	0.36	Acyl coenzyme A:cholesterol acyltransferase 1	SOAT1	P35610
TCMSP	(2E,8E)-Piperamide-C9:2	131752411	BYKNKNBUHGFXQF-VTBWALSUSA-N	117137-67-4	49.43	0.36	Epoxide hydratase	EPHX2	P34913
TCMSP	(2E,8E)-Piperamide-C9:2	131752411	BYKNKNBUHGFXQF-VTBWALSUSA-N	117137-67-4	49.43	0.36	Calcitonin gene-related peptide type 1 receptor	CALCRL	Q16602
TCMSP	(2E,8E)-Piperamide-C9:2	131752411	BYKNKNBUHGFXQF-VTBWALSUSA-N	117137-67-4	49.43	0.36	Tyrosine-protein kinase ITK/TSK	ITK	Q08881
TCMSP	(2E,8E)-Piperamide-C9:2	131752411	BYKNKNBUHGFXQF-VTBWALSUSA-N	117137-67-4	49.43	0.36	Perforin-1	PRF1	P14222
TCMSP	(2E,8E)-Piperamide-C9:2	131752411	BYKNKNBUHGFXQF-VTBWALSUSA-N	117137-67-4	49.43	0.36	Tyrosine-protein kinase ABL	ABL1	P00519
TCMSP	(2E,8E)-Piperamide-C9:2	131752411	BYKNKNBUHGFXQF-VTBWALSUSA-N	117137-67-4	49.43	0.36	Carbonic anhydrase VII	CA7	P43166
TCMSP	(2E,8E)-Piperamide-C9:2	131752411	BYKNKNBUHGFXQF-VTBWALSUSA-N	117137-67-4	49.43	0.36	Carbonic anhydrase XIII	CA13	Q8N1Q1
TCMSP	(2E,8E)-Piperamide-C9:2	131752411	BYKNKNBUHGFXQF-VTBWALSUSA-N	117137-67-4	49.43	0.36	Tyrosine-protein kinase receptor FLT3	FLT3	P36888
TCMSP	(2E,8E)-Piperamide-C9:2	131752411	BYKNKNBUHGFXQF-VTBWALSUSA-N	117137-67-4	49.43	0.36	c-Jun N-terminal kinase 1	MAPK8	P45983
TCMSP	(2E,8E)-Piperamide-C9:2	131752411	BYKNKNBUHGFXQF-VTBWALSUSA-N	117137-67-4	49.43	0.36	Tyrosine-protein kinase SYK	SYK	P43405
TCMSP	(2E,8E)-Piperamide-C9:2	131752411	BYKNKNBUHGFXQF-VTBWALSUSA-N	117137-67-4	49.43	0.36	Cyclin-dependent kinase 4	CDK4	P11802
TCMSP	(2E,8E)-Piperamide-C9:2	131752411	BYKNKNBUHGFXQF-VTBWALSUSA-N	117137-67-4	49.43	0.36	Dual specificity protein kinase TTK	TTK	P33981
TCMSP	(2E,8E)-Piperamide-C9:2	131752411	BYKNKNBUHGFXQF-VTBWALSUSA-N	117137-67-4	49.43	0.36	Estrogen receptor beta	ESR2	Q92731
TCMSP	(2E,8E)-Piperamide-C9:2	131752411	BYKNKNBUHGFXQF-VTBWALSUSA-N	117137-67-4	49.43	0.36	NAD-dependent deacetylase sirtuin 3	SIRT3	Q9NTG7
TCMSP	(2E,8E)-Piperamide-C9:2	131752411	BYKNKNBUHGFXQF-VTBWALSUSA-N	117137-67-4	49.43	0.36	NAD-dependent deacetylase sirtuin 1	SIRT1	Q96EB6
TCMSP	(2E,8E)-Piperamide-C9:2	131752411	BYKNKNBUHGFXQF-VTBWALSUSA-N	117137-67-4	49.43	0.36	Acetyl-CoA carboxylase 2	ACACB	O00763
TCMSP	(2E,8E)-Piperamide-C9:2	131752411	BYKNKNBUHGFXQF-VTBWALSUSA-N	117137-67-4	49.43	0.36	Diacylglycerol O-acyltransferase 1	DGAT1	O75907
TCMSP	(2E,8E)-Piperamide-C9:2	131752411	BYKNKNBUHGFXQF-VTBWALSUSA-N	117137-67-4	49.43	0.36	Rho-associated protein kinase 2	ROCK2	O75116
TCMSP	(2E,8E)-Piperamide-C9:2	131752411	BYKNKNBUHGFXQF-VTBWALSUSA-N	117137-67-4	49.43	0.36	Rho-associated protein kinase 1	ROCK1	Q13464
TCMSP	(2E,8E)-Piperamide-C9:2	131752411	BYKNKNBUHGFXQF-VTBWALSUSA-N	117137-67-4	49.43	0.36	Calcitonin-gene-related peptide receptor, CALCRL/RAMP1	CALCRL RAMP1	Q16602 O60894
TCMSP	(2E,8E)-Piperamide-C9:2	131752411	BYKNKNBUHGFXQF-VTBWALSUSA-N	117137-67-4	49.43	0.36	Serine/threonine-protein kinase Chk2	CHEK2	O96017
TCMSP	(2E,8E)-Piperamide-C9:2	131752411	BYKNKNBUHGFXQF-VTBWALSUSA-N	117137-67-4	49.43	0.36	Nicotinamide phosphoribosyltransferase	NAMPT	P43490
TCMSP	(2E,8E)-Piperamide-C9:2	131752411	BYKNKNBUHGFXQF-VTBWALSUSA-N	117137-67-4	49.43	0.36	Macrophage colony stimulating factor receptor	CSF1R	P07333
TCMSP	(2E,8E)-Piperamide-C9:2	131752411	BYKNKNBUHGFXQF-VTBWALSUSA-N	117137-67-4	49.43	0.36	Sodium/glucose cotransporter 1	SLC5A1	P13866
TCMSP	(2E,8E)-Piperamide-C9:2	131752411	BYKNKNBUHGFXQF-VTBWALSUSA-N	117137-67-4	49.43	0.36	Serine/threonine-protein kinase mTOR	MTOR	P42345
TCMSP	(2E,8E)-Piperamide-C9:2	131752411	BYKNKNBUHGFXQF-VTBWALSUSA-N	117137-67-4	49.43	0.36	Cyclin-dependent kinase 2/cyclin A	CDK2 CCNA1 CCNA2	P24941 P78396 P20248
TCMSP	(2E,8E)-Piperamide-C9:2	131752411	BYKNKNBUHGFXQF-VTBWALSUSA-N	117137-67-4	49.43	0.36	Serine/threonine-protein kinase 17B	STK17B	O94768
TCMSP	(2E,8E)-Piperamide-C9:2	131752411	BYKNKNBUHGFXQF-VTBWALSUSA-N	117137-67-4	49.43	0.36	Serine/threonine-protein kinase 17A	STK17A	Q9UEE5
TCMSP	(2E,8E)-Piperamide-C9:2	131752411	BYKNKNBUHGFXQF-VTBWALSUSA-N	117137-67-4	49.43	0.36	Inhibitor of nuclear factor kappa B kinase beta subunit	IKBKB	O14920
TCMSP	(2E,8E)-Piperamide-C9:2	131752411	BYKNKNBUHGFXQF-VTBWALSUSA-N	117137-67-4	49.43	0.36	Adenosine A1 receptor	ADORA1	P30542
TCMSP	(2E,8E)-Piperamide-C9:2	131752411	BYKNKNBUHGFXQF-VTBWALSUSA-N	117137-67-4	49.43	0.36	Adenosine A2a receptor	ADORA2A	P29274
TCMSP	(2E,8E)-Piperamide-C9:2	131752411	BYKNKNBUHGFXQF-VTBWALSUSA-N	117137-67-4	49.43	0.36	Inhibitor of NF-kappa-B kinase (IKK)	CHUK	O15111
TCMSP	(2E,8E)-Piperamide-C9:2	131752411	BYKNKNBUHGFXQF-VTBWALSUSA-N	117137-67-4	49.43	0.36	Epoxide hydrolase 1	EPHX1	P07099
TCMSP	(2E,8E)-Piperamide-C9:2	131752411	BYKNKNBUHGFXQF-VTBWALSUSA-N	117137-67-4	49.43	0.36	6-phosphofructo-2-kinase/fructose-2,6-bisphosphatase 3	PFKFB3	Q16875
TCMSP	(2E,8E)-Piperamide-C9:2	131752411	BYKNKNBUHGFXQF-VTBWALSUSA-N	117137-67-4	49.43	0.36	Stem cell growth factor receptor	KIT	P10721
TCMSP	(2E,8E)-Piperamide-C9:2	131752411	BYKNKNBUHGFXQF-VTBWALSUSA-N	117137-67-4	49.43	0.36	Anandamide amidohydrolase	FAAH	O00519
TCMSP	(2E,8E)-Piperamide-C9:2	131752411	BYKNKNBUHGFXQF-VTBWALSUSA-N	117137-67-4	49.43	0.36	Tyrosine-protein kinase LCK	LCK	P06239
TCMSP	(2E,8E)-Piperamide-C9:2	131752411	BYKNKNBUHGFXQF-VTBWALSUSA-N	117137-67-4	49.43	0.36	Tyrosine-protein kinase SRC	SRC	P12931
TCMSP	(2E,8E)-Piperamide-C9:2	131752411	BYKNKNBUHGFXQF-VTBWALSUSA-N	117137-67-4	49.43	0.36	Sphingosine 1-phosphate receptor Edg-1	S1PR1	P21453
TCMSP	(2E,8E)-Piperamide-C9:2	131752411	BYKNKNBUHGFXQF-VTBWALSUSA-N	117137-67-4	49.43	0.36	MAP kinase ERK1	MAPK3	P27361
TCMSP	(2E,8E)-Piperamide-C9:2	131752411	BYKNKNBUHGFXQF-VTBWALSUSA-N	117137-67-4	49.43	0.36	Phospholipase A2 group IIA	PLA2G2A	P14555
TCMSP	(2E,8E)-Piperamide-C9:2	131752411	BYKNKNBUHGFXQF-VTBWALSUSA-N	117137-67-4	49.43	0.36	Cytochrome P450 11B1	CYP11B1	P15538
TCMSP	(2E,8E)-Piperamide-C9:2	131752411	BYKNKNBUHGFXQF-VTBWALSUSA-N	117137-67-4	49.43	0.36	MAP kinase-activated protein kinase 2	MAPKAPK2	P49137
TCMSP	(2E,8E)-Piperamide-C9:2	131752411	BYKNKNBUHGFXQF-VTBWALSUSA-N	117137-67-4	49.43	0.36	Cytochrome P450 11B2	CYP11B2	P19099
TCMSP	(2E,8E)-Piperamide-C9:2	131752411	BYKNKNBUHGFXQF-VTBWALSUSA-N	117137-67-4	49.43	0.36	Intercellular adhesion molecule (ICAM-1), Integrin alpha-L/beta-2	ITGAL ICAM1 ITGB2	P20701 P05362 P05107
TCMSP	(2E,8E)-Piperamide-C9:2	131752411	BYKNKNBUHGFXQF-VTBWALSUSA-N	117137-67-4	49.43	0.36	MAP kinase p38 delta	MAPK13	O15264
TCMSP	(2E,8E)-Piperamide-C9:2	131752411	BYKNKNBUHGFXQF-VTBWALSUSA-N	117137-67-4	49.43	0.36	Tyrosine-protein kinase BTK	BTK	Q06187
TCMSP	(2E,8E)-Piperamide-C9:2	131752411	BYKNKNBUHGFXQF-VTBWALSUSA-N	117137-67-4	49.43	0.36	Thrombin	F2	P00734
TCMSP	(2E,8E)-Piperamide-C9:2	131752411	BYKNKNBUHGFXQF-VTBWALSUSA-N	117137-67-4	49.43	0.36	Poly [ADP-ribose] polymerase-1	PARP1	P09874
TCMSP	(2E,8E)-Piperamide-C9:2	131752411	BYKNKNBUHGFXQF-VTBWALSUSA-N	117137-67-4	49.43	0.36	Calcitonin gene-related peptide 1	CALCA	P06881
TCMSP	(2E,8E)-Piperamide-C9:2	131752411	BYKNKNBUHGFXQF-VTBWALSUSA-N	117137-67-4	49.43	0.36	Platelet-derived growth factor receptor beta	PDGFRB	P09619
TCMSP	(2E,8E)-Piperamide-C9:2	131752411	BYKNKNBUHGFXQF-VTBWALSUSA-N	117137-67-4	49.43	0.36	Lysosomal Pro-X carboxypeptidase	PRCP	P42785
TCMSP	(2E,8E)-Piperamide-C9:2	131752411	BYKNKNBUHGFXQF-VTBWALSUSA-N	117137-67-4	49.43	0.36	Vascular endothelial growth factor receptor 2	KDR	P35968
TCMSP	(2E,8E)-Piperamide-C9:2	131752411	BYKNKNBUHGFXQF-VTBWALSUSA-N	117137-67-4	49.43	0.36	Cyclin-dependent kinase 2	CDK2	P24941
TCMSP	(2E,8E)-Piperamide-C9:2	131752411	BYKNKNBUHGFXQF-VTBWALSUSA-N	117137-67-4	49.43	0.36	Cyclin-dependent kinase 1	CDK1	P06493
TCMSP	(2E,8E)-Piperamide-C9:2	131752411	BYKNKNBUHGFXQF-VTBWALSUSA-N	117137-67-4	49.43	0.36	Cystic fibrosis transmembrane conductance regulator	CFTR	P13569
TCMSP	(2E,8E)-Piperamide-C9:2	131752411	BYKNKNBUHGFXQF-VTBWALSUSA-N	117137-67-4	49.43	0.36	Aldehyde dehydrogenase	ALDH2	P05091
TCMSP	(2E,8E)-Piperamide-C9:2	131752411	BYKNKNBUHGFXQF-VTBWALSUSA-N	117137-67-4	49.43	0.36	Thrombin and coagulation factor X	F10	P00742
TCMSP	(2E,8E)-Piperamide-C9:2	131752411	BYKNKNBUHGFXQF-VTBWALSUSA-N	117137-67-4	49.43	0.36	Fatty acid synthase	FASN	P49327
TCMSP	(2E,8E)-Piperamide-C9:2	131752411	BYKNKNBUHGFXQF-VTBWALSUSA-N	117137-67-4	49.43	0.36	Serine/threonine-protein kinase B-raf	BRAF	P15056
TCMSP	(2E,8E)-Piperamide-C9:2	131752411	BYKNKNBUHGFXQF-VTBWALSUSA-N	117137-67-4	49.43	0.36	Gamma-secretase	PSEN2 PSENEN NCSTN APH1A PSEN1 APH1B	P49810 Q9NZ42 Q92542 Q96BI3 P49768 Q8WW43
TCMSP	(2E,8E)-Piperamide-C9:2	131752411	BYKNKNBUHGFXQF-VTBWALSUSA-N	117137-67-4	49.43	0.36	TGF-beta receptor type I	TGFBR1	P36897
TCMSP	(2E,8E)-Piperamide-C9:2	131752411	BYKNKNBUHGFXQF-VTBWALSUSA-N	117137-67-4	49.43	0.36	CDC7/DBF4 (Cell division cycle 7-related protein kinase/Activator of S phase kinase)	CDC7	O00311
TCMSP	(2E,8E)-Piperamide-C9:2	131752411	BYKNKNBUHGFXQF-VTBWALSUSA-N	117137-67-4	49.43	0.36	Dual specificity protein phosphatase 3	DUSP3	P51452
TCMSP	(2E,8E)-Piperamide-C9:2	131752411	BYKNKNBUHGFXQF-VTBWALSUSA-N	117137-67-4	49.43	0.36	Matrix metalloproteinase 13 (by homology)	MMP13	P45452
TCMSP	(2E,8E)-Piperamide-C9:2	131752411	BYKNKNBUHGFXQF-VTBWALSUSA-N	117137-67-4	49.43	0.36	Dual specificity phosphatase Cdc25A	CDC25A	P30304
TCMSP	(2E,8E)-Piperamide-C9:2	131752411	BYKNKNBUHGFXQF-VTBWALSUSA-N	117137-67-4	49.43	0.36	Monoglyceride lipase	MGLL	Q99685
TCMSP	(2E,8E)-Piperamide-C9:2	131752411	BYKNKNBUHGFXQF-VTBWALSUSA-N	117137-67-4	49.43	0.36	Dual specificity phosphatase Cdc25B	CDC25B	P30305
TCMSP	(2E,8E)-Piperamide-C9:2	131752411	BYKNKNBUHGFXQF-VTBWALSUSA-N	117137-67-4	49.43	0.36	Histone deacetylase 10	HDAC10	Q969S8
TCMSP	(2E,8E)-Piperamide-C9:2	131752411	BYKNKNBUHGFXQF-VTBWALSUSA-N	117137-67-4	49.43	0.36	Cytochrome P450 26A1	CYP26A1	O43174
TCMSP	(2E,8E)-Piperamide-C9:2	131752411	BYKNKNBUHGFXQF-VTBWALSUSA-N	117137-67-4	49.43	0.36	Ketohexokinase	KHK	P50053
TCMSP	(2E,8E)-Piperamide-C9:2	131752411	BYKNKNBUHGFXQF-VTBWALSUSA-N	117137-67-4	49.43	0.36	Insulin receptor	INSR	P06213
TCMSP	(2E,8E)-Piperamide-C9:2	131752411	BYKNKNBUHGFXQF-VTBWALSUSA-N	117137-67-4	49.43	0.36	Cyclin-dependent kinase 1/cyclin B	CCNB3 CDK1 CCNB1 CCNB2	Q8WWL7 P06493 P14635 O95067
TCMSP	(2E,8E)-Piperamide-C9:2	131752411	BYKNKNBUHGFXQF-VTBWALSUSA-N	117137-67-4	49.43	0.36	Tyrosine-protein kinase JAK3	JAK3	P52333
TCMSP	(2E,8E)-Piperamide-C9:2	131752411	BYKNKNBUHGFXQF-VTBWALSUSA-N	117137-67-4	49.43	0.36	Nerve growth factor receptor Trk-A	NTRK1	P04629
TCMSP	(2E,8E)-Piperamide-C9:2	131752411	BYKNKNBUHGFXQF-VTBWALSUSA-N	117137-67-4	49.43	0.36	Phosphodiesterase 7A	PDE7A	Q13946
TCMSP	(2E,8E)-Piperamide-C9:2	131752411	BYKNKNBUHGFXQF-VTBWALSUSA-N	117137-67-4	49.43	0.36	CDK2/Cyclin A	CCNA2 CDK2	P20248 P24941
TCMSP	(2E,8E)-Piperamide-C9:2	131752411	BYKNKNBUHGFXQF-VTBWALSUSA-N	117137-67-4	49.43	0.36	Phosphodiesterase 7B	PDE7B	Q9NP56
TCMSP	(2E,8E)-Piperamide-C9:2	131752411	BYKNKNBUHGFXQF-VTBWALSUSA-N	117137-67-4	49.43	0.36	Serine/threonine-protein kinase Aurora-A	AURKA	O14965
TCMSP	(2E,8E)-Piperamide-C9:2	131752411	BYKNKNBUHGFXQF-VTBWALSUSA-N	117137-67-4	49.43	0.36	p53-binding protein Mdm-2	MDM2	Q00987
TCMSP	(2E,8E)-Piperamide-C9:2	131752411	BYKNKNBUHGFXQF-VTBWALSUSA-N	117137-67-4	49.43	0.36	Serine-protein kinase ATR	ATR	Q13535
TCMSP	(2E,8E)-Piperamide-C9:2	131752411	BYKNKNBUHGFXQF-VTBWALSUSA-N	117137-67-4	49.43	0.36	Carnitine O-palmitoyltransferase 1, liver isoform	CPT1A	P50416
TCMSP	(2E,8E)-Piperamide-C9:2	131752411	BYKNKNBUHGFXQF-VTBWALSUSA-N	117137-67-4	49.43	0.36	Serine/threonine-protein kinase RAF	RAF1	P04049
TCMSP	(2E,8E)-Piperamide-C9:2	131752411	BYKNKNBUHGFXQF-VTBWALSUSA-N	117137-67-4	49.43	0.36	Glutamate NMDA receptor; GRIN1/GRIN2B	GRIN1 GRIN2B	Q05586 Q13224
TCMSP	(2E,8E)-Piperamide-C9:2	131752411	BYKNKNBUHGFXQF-VTBWALSUSA-N	117137-67-4	49.43	0.36	Vascular endothelial growth factor receptor 3	FLT4	P35916
TCMSP	(2E,8E)-Piperamide-C9:2	131752411	BYKNKNBUHGFXQF-VTBWALSUSA-N	117137-67-4	49.43	0.36	Tyrosine-protein kinase JAK2	JAK2	O60674
TCMSP	(2E,8E)-Piperamide-C9:2	131752411	BYKNKNBUHGFXQF-VTBWALSUSA-N	117137-67-4	49.43	0.36	JAK3/JAK1	JAK3 JAK1	P52333 P23458
TCMSP	(2E,8E)-Piperamide-C9:2	131752411	BYKNKNBUHGFXQF-VTBWALSUSA-N	117137-67-4	49.43	0.36	JAK1/JAK2/TYK2	TYK2 JAK2 JAK1	P29597 O60674 P23458
TCMSP	(2E,8E)-Piperamide-C9:2	131752411	BYKNKNBUHGFXQF-VTBWALSUSA-N	117137-67-4	49.43	0.36	JAK1/TYK2	TYK2 JAK1	P29597 P23458
TCMSP	(2E,8E)-Piperamide-C9:2	131752411	BYKNKNBUHGFXQF-VTBWALSUSA-N	117137-67-4	49.43	0.36	Tyrosine-protein kinase TYK2	TYK2	P29597
TCMSP	(2E,8E)-Piperamide-C9:2	131752411	BYKNKNBUHGFXQF-VTBWALSUSA-N	117137-67-4	49.43	0.36	Autotaxin	ENPP2	Q13822
TCMSP	(2E,8E)-Piperamide-C9:2	131752411	BYKNKNBUHGFXQF-VTBWALSUSA-N	117137-67-4	49.43	0.36	Phosphodiesterase 10A	PDE10A	Q9Y233
TCMSP	(2E,8E)-Piperamide-C9:2	131752411	BYKNKNBUHGFXQF-VTBWALSUSA-N	117137-67-4	49.43	0.36	Dihydroorotate dehydrogenase	DHODH	Q02127
TCMSP	(2E,8E)-Piperamide-C9:2	131752411	BYKNKNBUHGFXQF-VTBWALSUSA-N	117137-67-4	49.43	0.36	Serine/threonine-protein kinase Aurora-B	AURKB	Q96GD4
TCMSP	(2E,8E)-Piperamide-C9:2	131752411	BYKNKNBUHGFXQF-VTBWALSUSA-N	117137-67-4	49.43	0.36	Glucose-dependent insulinotropic receptor	GPR119	Q8TDV5
TCMSP	(2E,8E)-Piperamide-C9:2	131752411	BYKNKNBUHGFXQF-VTBWALSUSA-N	117137-67-4	49.43	0.36	Acid ceramidase	ASAH1	Q13510
TCMSP	(2E,8E)-Piperamide-C9:2	131752411	BYKNKNBUHGFXQF-VTBWALSUSA-N	117137-67-4	49.43	0.36	Sodium/calcium exchanger 1	SLC8A1	P32418
TCMSP	(2E,8E)-Piperamide-C9:2	131752411	BYKNKNBUHGFXQF-VTBWALSUSA-N	117137-67-4	49.43	0.36	Neuropeptide Y receptor type 5 (by homology)	NPY5R	Q15761
TCMSP	Trijuganone B	124416	AZIUYJPOBCMPON-UHFFFAOYSA-N	126979-84-8	38.75	0.36	Aldose reductase (by homology)	AKR1B1	P15121
TCMSP	Trijuganone B	124416	AZIUYJPOBCMPON-UHFFFAOYSA-N	126979-84-8	38.75	0.36	Acetylcholinesterase	ACHE	P22303
TCMSP	Trijuganone B	124416	AZIUYJPOBCMPON-UHFFFAOYSA-N	126979-84-8	38.75	0.36	Acyl coenzyme A:cholesterol acyltransferase	CES1	P23141
TCMSP	Trijuganone B	124416	AZIUYJPOBCMPON-UHFFFAOYSA-N	126979-84-8	38.75	0.36	Carboxylesterase 2	CES2	O00748
TCMSP	Trijuganone B	124416	AZIUYJPOBCMPON-UHFFFAOYSA-N	126979-84-8	38.75	0.36	Signal transducer and activator of transcription 3	STAT3	P40763
TCMSP	Trijuganone B	124416	AZIUYJPOBCMPON-UHFFFAOYSA-N	126979-84-8	38.75	0.36	Protein-tyrosine phosphatase 1C	PTPN6	P29350
TCMSP	Trijuganone B	124416	AZIUYJPOBCMPON-UHFFFAOYSA-N	126979-84-8	38.75	0.36	Protein-tyrosine phosphatase 2C	PTPN11	Q06124
TCMSP	Trijuganone B	124416	AZIUYJPOBCMPON-UHFFFAOYSA-N	126979-84-8	38.75	0.36	Indoleamine 2,3-dioxygenase	IDO1	P14902
TCMSP	Trijuganone B	124416	AZIUYJPOBCMPON-UHFFFAOYSA-N	126979-84-8	38.75	0.36	Dual specificity protein phosphatase 1 (by homology)	DUSP1	P28562
TCMSP	Trijuganone B	124416	AZIUYJPOBCMPON-UHFFFAOYSA-N	126979-84-8	38.75	0.36	GABA-A receptor; alpha-3/beta-3/gamma-2	GABRB3 GABRA3 GABRG2	P28472 P34903 P18507
TCMSP	Trijuganone B	124416	AZIUYJPOBCMPON-UHFFFAOYSA-N	126979-84-8	38.75	0.36	GABA-A receptor; alpha-1/beta-3/gamma-2	GABRB3 GABRG2 GABRA1	P28472 P18507 P14867
TCMSP	Trijuganone B	124416	AZIUYJPOBCMPON-UHFFFAOYSA-N	126979-84-8	38.75	0.36	GABA-A receptor; alpha-5/beta-3/gamma-2	GABRB3 GABRG2 GABRA5	P28472 P18507 P31644
TCMSP	Trijuganone B	124416	AZIUYJPOBCMPON-UHFFFAOYSA-N	126979-84-8	38.75	0.36	GABA-A receptor; alpha-2/beta-3/gamma-2	GABRA2 GABRB3 GABRG2	P47869 P28472 P18507
TCMSP	Trijuganone B	124416	AZIUYJPOBCMPON-UHFFFAOYSA-N	126979-84-8	38.75	0.36	Vascular endothelial growth factor receptor 2	KDR	P35968
TCMSP	Trijuganone B	124416	AZIUYJPOBCMPON-UHFFFAOYSA-N	126979-84-8	38.75	0.36	Tyrosyl-DNA phosphodiesterase 2	TDP2	O95551
TCMSP	Trijuganone B	124416	AZIUYJPOBCMPON-UHFFFAOYSA-N	126979-84-8	38.75	0.36	DNA topoisomerase I (by homology)	TOP1	P11387
TCMSP	Trijuganone B	124416	AZIUYJPOBCMPON-UHFFFAOYSA-N	126979-84-8	38.75	0.36	Mucosa-associated lymphoid tissue lymphoma translocation protein 1	MALT1	Q9UDY8
TCMSP	Trijuganone B	124416	AZIUYJPOBCMPON-UHFFFAOYSA-N	126979-84-8	38.75	0.36	Lysine-specific demethylase 4D-like	KDM4E	B2RXH2
TCMSP	Trijuganone B	124416	AZIUYJPOBCMPON-UHFFFAOYSA-N	126979-84-8	38.75	0.36	Receptor protein-tyrosine kinase erbB-2	ERBB2	P04626
TCMSP	Trijuganone B	124416	AZIUYJPOBCMPON-UHFFFAOYSA-N	126979-84-8	38.75	0.36	Epidermal growth factor receptor erbB1	EGFR	P00533
TCMSP	Trijuganone B	124416	AZIUYJPOBCMPON-UHFFFAOYSA-N	126979-84-8	38.75	0.36	PI3-kinase p110-alpha subunit	PIK3CA	P42336
TCMSP	Trijuganone B	124416	AZIUYJPOBCMPON-UHFFFAOYSA-N	126979-84-8	38.75	0.36	Leukocyte common antigen	PTPRC	P08575
TCMSP	Trijuganone B	124416	AZIUYJPOBCMPON-UHFFFAOYSA-N	126979-84-8	38.75	0.36	Isocitrate dehydrogenase [NADP] cytoplasmic	IDH1	O75874
TCMSP	Trijuganone B	124416	AZIUYJPOBCMPON-UHFFFAOYSA-N	126979-84-8	38.75	0.36	Histone deacetylase 6	HDAC6	Q9UBN7
TCMSP	Trijuganone B	124416	AZIUYJPOBCMPON-UHFFFAOYSA-N	126979-84-8	38.75	0.36	Cannabinoid receptor 1	CNR1	P21554
TCMSP	Trijuganone B	124416	AZIUYJPOBCMPON-UHFFFAOYSA-N	126979-84-8	38.75	0.36	Histone deacetylase 1	HDAC1	Q13547
TCMSP	Trijuganone B	124416	AZIUYJPOBCMPON-UHFFFAOYSA-N	126979-84-8	38.75	0.36	c-Jun N-terminal kinase 1	MAPK8	P45983
TCMSP	Trijuganone B	124416	AZIUYJPOBCMPON-UHFFFAOYSA-N	126979-84-8	38.75	0.36	ADAM17	ADAM17	P78536
TCMSP	N-isobutyleicosa-2(E),4(E),8(Z)-trienamide	155167294	WBBCNGSATYECFE-VPDWFJFDSA-N	NA	44.48	0.32	Cannabinoid receptor 1	CNR1	P21554
TCMSP	N-isobutyleicosa-2(E),4(E),8(Z)-trienamide	155167294	WBBCNGSATYECFE-VPDWFJFDSA-N	NA	44.48	0.32	Cannabinoid receptor 2	CNR2	P34972
TCMSP	N-isobutyleicosa-2(E),4(E),8(Z)-trienamide	155167294	WBBCNGSATYECFE-VPDWFJFDSA-N	NA	44.48	0.32	Mu opioid receptor	OPRM1	P35372
TCMSP	N-isobutyleicosa-2(E),4(E),8(Z)-trienamide	155167294	WBBCNGSATYECFE-VPDWFJFDSA-N	NA	44.48	0.32	Delta opioid receptor	OPRD1	P41143
TCMSP	N-isobutyleicosa-2(E),4(E),8(Z)-trienamide	155167294	WBBCNGSATYECFE-VPDWFJFDSA-N	NA	44.48	0.32	Peroxisome proliferator-activated receptor gamma	PPARG	P37231
TCMSP	N-isobutyleicosa-2(E),4(E),8(Z)-trienamide	155167294	WBBCNGSATYECFE-VPDWFJFDSA-N	NA	44.48	0.32	Peroxisome proliferator-activated receptor delta	PPARD	Q03181
TCMSP	N-isobutyleicosa-2(E),4(E),8(Z)-trienamide	155167294	WBBCNGSATYECFE-VPDWFJFDSA-N	NA	44.48	0.32	Peroxisome proliferator-activated receptor alpha	PPARA	Q07869
TCMSP	N-isobutyleicosa-2(E),4(E),8(Z)-trienamide	155167294	WBBCNGSATYECFE-VPDWFJFDSA-N	NA	44.48	0.32	Plasma retinol-binding protein	RBP4	P02753
TCMSP	N-isobutyleicosa-2(E),4(E),8(Z)-trienamide	155167294	WBBCNGSATYECFE-VPDWFJFDSA-N	NA	44.48	0.32	Glucocorticoid receptor	NR3C1	P04150
TCMSP	N-isobutyleicosa-2(E),4(E),8(Z)-trienamide	155167294	WBBCNGSATYECFE-VPDWFJFDSA-N	NA	44.48	0.32	Tyrosine-protein kinase ABL	ABL1	P00519
TCMSP	N-Isobutyl-2,4-icosadienamide	6441067	LMZPUHBJSQVRHE-HYGARKJASA-N	54794-71-7	38.86	0.32	Cannabinoid receptor 1 (by homology)	CNR1	P21554
TCMSP	N-Isobutyl-2,4-icosadienamide	6441067	LMZPUHBJSQVRHE-HYGARKJASA-N	54794-71-7	38.86	0.32	Cannabinoid receptor 2	CNR2	P34972
TCMSP	N-Isobutyl-2,4-icosadienamide	6441067	LMZPUHBJSQVRHE-HYGARKJASA-N	54794-71-7	38.86	0.32	Mu opioid receptor	OPRM1	P35372
TCMSP	N-Isobutyl-2,4-icosadienamide	6441067	LMZPUHBJSQVRHE-HYGARKJASA-N	54794-71-7	38.86	0.32	Peroxisome proliferator-activated receptor delta	PPARD	Q03181
TCMSP	N-Isobutyl-2,4-icosadienamide	6441067	LMZPUHBJSQVRHE-HYGARKJASA-N	54794-71-7	38.86	0.32	Delta opioid receptor	OPRD1	P41143
TCMSP	N-Isobutyl-2,4-icosadienamide	6441067	LMZPUHBJSQVRHE-HYGARKJASA-N	54794-71-7	38.86	0.32	Peroxisome proliferator-activated receptor alpha	PPARA	Q07869
TCMSP	N-Isobutyl-2,4-icosadienamide	6441067	LMZPUHBJSQVRHE-HYGARKJASA-N	54794-71-7	38.86	0.32	Peroxisome proliferator-activated receptor gamma	PPARG	P37231
TCMSP	N-Isobutyl-2,4-icosadienamide	6441067	LMZPUHBJSQVRHE-HYGARKJASA-N	54794-71-7	38.86	0.32	Plasma retinol-binding protein	RBP4	P02753
TCMSP	N-Isobutyl-2,4-icosadienamide	6441067	LMZPUHBJSQVRHE-HYGARKJASA-N	54794-71-7	38.86	0.32	Acetyl-CoA carboxylase 2	ACACB	O00763
TCMSP	N-Isobutyl-2,4-icosadienamide	6441067	LMZPUHBJSQVRHE-HYGARKJASA-N	54794-71-7	38.86	0.32	Neuropeptide Y receptor type 5	NPY5R	Q15761
TCMSP	N-Isobutyl-2,4-icosadienamide	6441067	LMZPUHBJSQVRHE-HYGARKJASA-N	54794-71-7	38.86	0.32	Sentrin-specific protease 1	SENP1	Q9P0U3
TCMSP	N-Isobutyl-2,4-icosadienamide	6441067	LMZPUHBJSQVRHE-HYGARKJASA-N	54794-71-7	38.86	0.32	Sentrin-specific protease 2	SENP2	Q9HC62
TCMSP	N-Isobutyl-2,4-icosadienamide	6441067	LMZPUHBJSQVRHE-HYGARKJASA-N	54794-71-7	38.86	0.32	Epoxide hydratase	EPHX2	P34913
TCMSP	N-Isobutyl-2,4-icosadienamide	6441067	LMZPUHBJSQVRHE-HYGARKJASA-N	54794-71-7	38.86	0.32	Histamine H1 receptor	HRH1	P35367
TCMSP	N-Isobutyl-2,4-icosadienamide	6441067	LMZPUHBJSQVRHE-HYGARKJASA-N	54794-71-7	38.86	0.32	LDL-associated phospholipase A2	PLA2G7	Q13093
TCMSP	N-Isobutyl-2,4-icosadienamide	6441067	LMZPUHBJSQVRHE-HYGARKJASA-N	54794-71-7	38.86	0.32	Epoxide hydrolase 1	EPHX1	P07099
TCMSP	N-Isobutyl-2,4-icosadienamide	6441067	LMZPUHBJSQVRHE-HYGARKJASA-N	54794-71-7	38.86	0.32	Melanin-concentrating hormone receptor 1	MCHR1	Q99705
TCMSP	N-Isobutyl-2,4-icosadienamide	6441067	LMZPUHBJSQVRHE-HYGARKJASA-N	54794-71-7	38.86	0.32	Proteinase-activated receptor 1	F2R	P25116
TCMSP	N-Isobutyl-2,4-icosadienamide	6441067	LMZPUHBJSQVRHE-HYGARKJASA-N	54794-71-7	38.86	0.32	Beta-secretase 1	BACE1	P56817
TCMSP	N-Isobutyl-2,4-icosadienamide	6441067	LMZPUHBJSQVRHE-HYGARKJASA-N	54794-71-7	38.86	0.32	MAP kinase ERK1	MAPK3	P27361
TCMSP	N-Isobutyl-2,4-icosadienamide	6441067	LMZPUHBJSQVRHE-HYGARKJASA-N	54794-71-7	38.86	0.32	Smoothened homolog	SMO	Q99835
TCMSP	N-Isobutyl-2,4-icosadienamide	6441067	LMZPUHBJSQVRHE-HYGARKJASA-N	54794-71-7	38.86	0.32	Histamine H2 receptor	HRH2	P25021
TCMSP	N-Isobutyl-2,4-icosadienamide	6441067	LMZPUHBJSQVRHE-HYGARKJASA-N	54794-71-7	38.86	0.32	Adenosine A2a receptor	ADORA2A	P29274
TCMSP	N-Isobutyl-2,4-icosadienamide	6441067	LMZPUHBJSQVRHE-HYGARKJASA-N	54794-71-7	38.86	0.32	Adenosine A2b receptor	ADORA2B	P29275
TCMSP	N-Isobutyl-2,4-icosadienamide	6441067	LMZPUHBJSQVRHE-HYGARKJASA-N	54794-71-7	38.86	0.32	Gamma-secretase	PSEN2 PSENEN NCSTN APH1A PSEN1 APH1B	P49810 Q9NZ42 Q92542 Q96BI3 P49768 Q8WW43
TCMSP	piperine	638024	MXXWOMGUGJBKIW-YPCIICBESA-N	94-62-2	42.52	0.23	Monoamine oxidase B	MAOB	P27338
TCMSP	piperine	638024	MXXWOMGUGJBKIW-YPCIICBESA-N	94-62-2	42.52	0.23	Sigma opioid receptor	SIGMAR1	Q99720
TCMSP	piperine	638024	MXXWOMGUGJBKIW-YPCIICBESA-N	94-62-2	42.52	0.23	Acetyl-CoA carboxylase 2	ACACB	O00763
TCMSP	piperine	638024	MXXWOMGUGJBKIW-YPCIICBESA-N	94-62-2	42.52	0.23	PI4-kinase beta subunit	PI4KB	Q9UBF8
TCMSP	piperine	638024	MXXWOMGUGJBKIW-YPCIICBESA-N	94-62-2	42.52	0.23	PI4-kinase alpha subunit	PI4KA	P42356
TCMSP	piperine	638024	MXXWOMGUGJBKIW-YPCIICBESA-N	94-62-2	42.52	0.23	Adenosine A2a receptor	ADORA2A	P29274
TCMSP	piperine	638024	MXXWOMGUGJBKIW-YPCIICBESA-N	94-62-2	42.52	0.23	Steryl-sulfatase	STS	P08842
TCMSP	piperine	638024	MXXWOMGUGJBKIW-YPCIICBESA-N	94-62-2	42.52	0.23	Macrophage colony stimulating factor receptor	CSF1R	P07333
TCMSP	piperine	638024	MXXWOMGUGJBKIW-YPCIICBESA-N	94-62-2	42.52	0.23	Anandamide amidohydrolase	FAAH	O00519
TCMSP	piperine	638024	MXXWOMGUGJBKIW-YPCIICBESA-N	94-62-2	42.52	0.23	6-phosphofructo-2-kinase/fructose-2,6-bisphosphatase 3	PFKFB3	Q16875
TCMSP	piperine	638024	MXXWOMGUGJBKIW-YPCIICBESA-N	94-62-2	42.52	0.23	N-acylsphingosine-amidohydrolase	NAAA	Q02083
TCMSP	piperine	638024	MXXWOMGUGJBKIW-YPCIICBESA-N	94-62-2	42.52	0.23	Acid ceramidase	ASAH1	Q13510
TCMSP	piperine	638024	MXXWOMGUGJBKIW-YPCIICBESA-N	94-62-2	42.52	0.23	Transient receptor potential cation channel subfamily M member 8 (by homology)	TRPM8	Q7Z2W7
TCMSP	piperine	638024	MXXWOMGUGJBKIW-YPCIICBESA-N	94-62-2	42.52	0.23	Adenosine A3 receptor	ADORA3	P0DMS8
TCMSP	piperine	638024	MXXWOMGUGJBKIW-YPCIICBESA-N	94-62-2	42.52	0.23	Phosphodiesterase 4D	PDE4D	Q08499
TCMSP	piperine	638024	MXXWOMGUGJBKIW-YPCIICBESA-N	94-62-2	42.52	0.23	Poly [ADP-ribose] polymerase-1	PARP1	P09874
TCMSP	piperine	638024	MXXWOMGUGJBKIW-YPCIICBESA-N	94-62-2	42.52	0.23	Cathepsin L	CTSL	P07711
TCMSP	piperine	638024	MXXWOMGUGJBKIW-YPCIICBESA-N	94-62-2	42.52	0.23	Cathepsin (B and K)	CTSB	P07858
TCMSP	piperine	638024	MXXWOMGUGJBKIW-YPCIICBESA-N	94-62-2	42.52	0.23	Diacylglycerol O-acyltransferase 1	DGAT1	O75907
TCMSP	piperine	638024	MXXWOMGUGJBKIW-YPCIICBESA-N	94-62-2	42.52	0.23	Serine/threonine-protein kinase Aurora-B	AURKB	Q96GD4
TCMSP	piperine	638024	MXXWOMGUGJBKIW-YPCIICBESA-N	94-62-2	42.52	0.23	Cyclin-dependent kinase 1	CDK1	P06493
TCMSP	piperine	638024	MXXWOMGUGJBKIW-YPCIICBESA-N	94-62-2	42.52	0.23	Sodium channel protein type IX alpha subunit	SCN9A	Q15858
TCMSP	piperine	638024	MXXWOMGUGJBKIW-YPCIICBESA-N	94-62-2	42.52	0.23	Serine/threonine-protein kinase Aurora-A	AURKA	O14965
TCMSP	piperine	638024	MXXWOMGUGJBKIW-YPCIICBESA-N	94-62-2	42.52	0.23	Adenosine A1 receptor	ADORA1	P30542
TCMSP	piperine	638024	MXXWOMGUGJBKIW-YPCIICBESA-N	94-62-2	42.52	0.23	Endothelin receptor ET-A (by homology)	EDNRA	P25101
TCMSP	piperine	638024	MXXWOMGUGJBKIW-YPCIICBESA-N	94-62-2	42.52	0.23	CDC7/DBF4 (Cell division cycle 7-related protein kinase/Activator of S phase kinase)	DBF4 CDC7	Q9UBU7 O00311
TCMSP	piperine	638024	MXXWOMGUGJBKIW-YPCIICBESA-N	94-62-2	42.52	0.23	CDC7/DBF4 (Cell division cycle 7-related protein kinase/Activator of S phase kinase)	CDC7	O00311
TCMSP	piperine	638024	MXXWOMGUGJBKIW-YPCIICBESA-N	94-62-2	42.52	0.23	Acetylcholinesterase	ACHE	P22303
TCMSP	piperine	638024	MXXWOMGUGJBKIW-YPCIICBESA-N	94-62-2	42.52	0.23	Dopamine D2 receptor	DRD2	P14416
TCMSP	piperine	638024	MXXWOMGUGJBKIW-YPCIICBESA-N	94-62-2	42.52	0.23	Serine/threonine-protein kinase Chk2	CHEK2	O96017
TCMSP	piperine	638024	MXXWOMGUGJBKIW-YPCIICBESA-N	94-62-2	42.52	0.23	Phosphodiesterase 7A	PDE7A	Q13946
TCMSP	piperine	638024	MXXWOMGUGJBKIW-YPCIICBESA-N	94-62-2	42.52	0.23	Ribosomal protein S6 kinase 1	RPS6KB1	P23443
TCMSP	piperine	638024	MXXWOMGUGJBKIW-YPCIICBESA-N	94-62-2	42.52	0.23	Sodium/glucose cotransporter 1	SLC5A1	P13866
TCMSP	piperine	638024	MXXWOMGUGJBKIW-YPCIICBESA-N	94-62-2	42.52	0.23	Nicotinamide phosphoribosyltransferase	NAMPT	P43490
TCMSP	piperine	638024	MXXWOMGUGJBKIW-YPCIICBESA-N	94-62-2	42.52	0.23	p53-binding protein Mdm-2	MDM2	Q00987
TCMSP	piperine	638024	MXXWOMGUGJBKIW-YPCIICBESA-N	94-62-2	42.52	0.23	Glucose-dependent insulinotropic receptor	GPR119	Q8TDV5
TCMSP	piperine	638024	MXXWOMGUGJBKIW-YPCIICBESA-N	94-62-2	42.52	0.23	Xanthine dehydrogenase	XDH	P47989
TCMSP	piperine	638024	MXXWOMGUGJBKIW-YPCIICBESA-N	94-62-2	42.52	0.23	Nerve growth factor receptor Trk-A	NTRK1	P04629
TCMSP	piperine	638024	MXXWOMGUGJBKIW-YPCIICBESA-N	94-62-2	42.52	0.23	Acyl coenzyme A:cholesterol acyltransferase 1	SOAT1	P35610
TCMSP	piperine	638024	MXXWOMGUGJBKIW-YPCIICBESA-N	94-62-2	42.52	0.23	Cathepsin (V and K)	CTSV	O60911
TCMSP	piperine	638024	MXXWOMGUGJBKIW-YPCIICBESA-N	94-62-2	42.52	0.23	DNA topoisomerase II alpha	TOP2A	P11388
TCMSP	piperine	638024	MXXWOMGUGJBKIW-YPCIICBESA-N	94-62-2	42.52	0.23	Ribosomal protein S6 kinase alpha 3	RPS6KA3	P51812
TCMSP	piperine	638024	MXXWOMGUGJBKIW-YPCIICBESA-N	94-62-2	42.52	0.23	Sphingosine 1-phosphate receptor Edg-1	S1PR1	P21453
TCMSP	piperine	638024	MXXWOMGUGJBKIW-YPCIICBESA-N	94-62-2	42.52	0.23	Tyrosine-protein kinase ABL	ABL1	P00519
TCMSP	piperine	638024	MXXWOMGUGJBKIW-YPCIICBESA-N	94-62-2	42.52	0.23	Tyrosine-protein kinase LCK	LCK	P06239
TCMSP	piperine	638024	MXXWOMGUGJBKIW-YPCIICBESA-N	94-62-2	42.52	0.23	15-hydroxyprostaglandin dehydrogenase [NAD+]	HPGD	P15428
TCMSP	piperine	638024	MXXWOMGUGJBKIW-YPCIICBESA-N	94-62-2	42.52	0.23	Epoxide hydratase	EPHX2	P34913
TCMSP	piperine	638024	MXXWOMGUGJBKIW-YPCIICBESA-N	94-62-2	42.52	0.23	Pyruvate kinase isozymes M1/M2	PKM	P14618
TCMSP	piperine	638024	MXXWOMGUGJBKIW-YPCIICBESA-N	94-62-2	42.52	0.23	Inhibitor of nuclear factor kappa B kinase beta subunit	IKBKB	O14920
TCMSP	piperine	638024	MXXWOMGUGJBKIW-YPCIICBESA-N	94-62-2	42.52	0.23	Beta secretase 2	BACE2	Q9Y5Z0
TCMSP	piperine	638024	MXXWOMGUGJBKIW-YPCIICBESA-N	94-62-2	42.52	0.23	Dipeptidyl peptidase IV	DPP4	P27487
TCMSP	piperine	638024	MXXWOMGUGJBKIW-YPCIICBESA-N	94-62-2	42.52	0.23	Phosphodiesterase 10A	PDE10A	Q9Y233
TCMSP	piperine	638024	MXXWOMGUGJBKIW-YPCIICBESA-N	94-62-2	42.52	0.23	Vasopressin V1a receptor	AVPR1A	P37288
TCMSP	piperine	638024	MXXWOMGUGJBKIW-YPCIICBESA-N	94-62-2	42.52	0.23	Cytochrome P450 11B1	CYP11B1	P15538
TCMSP	piperine	638024	MXXWOMGUGJBKIW-YPCIICBESA-N	94-62-2	42.52	0.23	MAP kinase-activated protein kinase 2	MAPKAPK2	P49137
TCMSP	piperine	638024	MXXWOMGUGJBKIW-YPCIICBESA-N	94-62-2	42.52	0.23	Cytochrome P450 11B2	CYP11B2	P19099
TCMSP	piperine	638024	MXXWOMGUGJBKIW-YPCIICBESA-N	94-62-2	42.52	0.23	MAP kinase signal-integrating kinase 2	MKNK2	Q9HBH9
TCMSP	piperine	638024	MXXWOMGUGJBKIW-YPCIICBESA-N	94-62-2	42.52	0.23	Dynamin-1	DNM1	Q05193
TCMSP	piperine	638024	MXXWOMGUGJBKIW-YPCIICBESA-N	94-62-2	42.52	0.23	Adenosine A2b receptor	ADORA2B	P29275
TCMSP	piperine	638024	MXXWOMGUGJBKIW-YPCIICBESA-N	94-62-2	42.52	0.23	Proteinase-activated receptor 1	F2R	P25116
TCMSP	piperine	638024	MXXWOMGUGJBKIW-YPCIICBESA-N	94-62-2	42.52	0.23	Cystic fibrosis transmembrane conductance regulator	CFTR	P13569
TCMSP	piperine	638024	MXXWOMGUGJBKIW-YPCIICBESA-N	94-62-2	42.52	0.23	Corticotropin releasing factor receptor 1	CRHR1	P34998
TCMSP	piperine	638024	MXXWOMGUGJBKIW-YPCIICBESA-N	94-62-2	42.52	0.23	Thrombin	F2	P00734
TCMSP	piperine	638024	MXXWOMGUGJBKIW-YPCIICBESA-N	94-62-2	42.52	0.23	Cyclin-dependent kinase 2/cyclin E	CCNE2 CDK2 CCNE1	O96020 P24941 P24864
TCMSP	piperine	638024	MXXWOMGUGJBKIW-YPCIICBESA-N	94-62-2	42.52	0.23	Interleukin-8 receptor B	CXCR2	P25025
TCMSP	piperine	638024	MXXWOMGUGJBKIW-YPCIICBESA-N	94-62-2	42.52	0.23	Glucocorticoid receptor	NR3C1	P04150
TCMSP	piperine	638024	MXXWOMGUGJBKIW-YPCIICBESA-N	94-62-2	42.52	0.23	c-Jun N-terminal kinase 1	MAPK8	P45983
TCMSP	piperine	638024	MXXWOMGUGJBKIW-YPCIICBESA-N	94-62-2	42.52	0.23	Serine/threonine-protein kinase mTOR	MTOR	P42345
TCMSP	piperine	638024	MXXWOMGUGJBKIW-YPCIICBESA-N	94-62-2	42.52	0.23	Protein-tyrosine phosphatase 4A3	PTP4A3	O75365
TCMSP	piperine	638024	MXXWOMGUGJBKIW-YPCIICBESA-N	94-62-2	42.52	0.23	Leucine-rich repeat serine/threonine-protein kinase 2	LRRK2	Q5S007
TCMSP	piperine	638024	MXXWOMGUGJBKIW-YPCIICBESA-N	94-62-2	42.52	0.23	Stem cell growth factor receptor	KIT	P10721
TCMSP	piperine	638024	MXXWOMGUGJBKIW-YPCIICBESA-N	94-62-2	42.52	0.23	Platelet-derived growth factor receptor alpha	PDGFRA	P16234
TCMSP	piperine	638024	MXXWOMGUGJBKIW-YPCIICBESA-N	94-62-2	42.52	0.23	Alpha-1b adrenergic receptor	ADRA1B	P35368
TCMSP	piperine	638024	MXXWOMGUGJBKIW-YPCIICBESA-N	94-62-2	42.52	0.23	Tyrosine-protein kinase SRC	SRC	P12931
TCMSP	piperine	638024	MXXWOMGUGJBKIW-YPCIICBESA-N	94-62-2	42.52	0.23	Focal adhesion kinase 1	PTK2	Q05397
TCMSP	piperine	638024	MXXWOMGUGJBKIW-YPCIICBESA-N	94-62-2	42.52	0.23	Tyrosine-protein kinase JAK2	JAK2	O60674
TCMSP	piperine	638024	MXXWOMGUGJBKIW-YPCIICBESA-N	94-62-2	42.52	0.23	Rho-associated protein kinase 2	ROCK2	O75116
TCMSP	piperine	638024	MXXWOMGUGJBKIW-YPCIICBESA-N	94-62-2	42.52	0.23	Rho-associated protein kinase 1	ROCK1	Q13464
TCMSP	piperine	638024	MXXWOMGUGJBKIW-YPCIICBESA-N	94-62-2	42.52	0.23	Heat shock protein HSP 90-alpha	HSP90AA1	P07900
TCMSP	piperine	638024	MXXWOMGUGJBKIW-YPCIICBESA-N	94-62-2	42.52	0.23	cAMP-dependent protein kinase alpha-catalytic subunit	PRKACA	P17612
TCMSP	piperine	638024	MXXWOMGUGJBKIW-YPCIICBESA-N	94-62-2	42.52	0.23	Acyl-CoA desaturase	SCD	O00767
TCMSP	piperine	638024	MXXWOMGUGJBKIW-YPCIICBESA-N	94-62-2	42.52	0.23	Type-1 angiotensin II receptor	AGTR1	P30556
TCMSP	piperine	638024	MXXWOMGUGJBKIW-YPCIICBESA-N	94-62-2	42.52	0.23	Lysosomal Pro-X carboxypeptidase	PRCP	P42785
TCMSP	piperine	638024	MXXWOMGUGJBKIW-YPCIICBESA-N	94-62-2	42.52	0.23	Hepatocyte growth factor receptor	MET	P08581
TCMSP	piperine	638024	MXXWOMGUGJBKIW-YPCIICBESA-N	94-62-2	42.52	0.23	Neuropeptide Y receptor type 1	NPY1R	P25929
TCMSP	piperine	638024	MXXWOMGUGJBKIW-YPCIICBESA-N	94-62-2	42.52	0.23	Perforin-1	PRF1	P14222
TCMSP	piperine	638024	MXXWOMGUGJBKIW-YPCIICBESA-N	94-62-2	42.52	0.23	Lysine-specific demethylase 4D-like	KDM4E	B2RXH2
TCMSP	piperine	638024	MXXWOMGUGJBKIW-YPCIICBESA-N	94-62-2	42.52	0.23	Lysine-specific demethylase 5C	KDM5C	P41229
TCMSP	piperine	638024	MXXWOMGUGJBKIW-YPCIICBESA-N	94-62-2	42.52	0.23	ADAMTS4	ADAMTS4	O75173
TCMSP	piperine	638024	MXXWOMGUGJBKIW-YPCIICBESA-N	94-62-2	42.52	0.23	Cyclin-dependent kinase 2	CDK2	P24941
TCMSP	piperine	638024	MXXWOMGUGJBKIW-YPCIICBESA-N	94-62-2	42.52	0.23	CDK2/Cyclin A	CCNA2 CDK2	P20248 P24941
TCMSP	piperine	638024	MXXWOMGUGJBKIW-YPCIICBESA-N	94-62-2	42.52	0.23	Cyclin-dependent kinase 4	CDK4	P11802
TCMSP	piperine	638024	MXXWOMGUGJBKIW-YPCIICBESA-N	94-62-2	42.52	0.23	Lysine-specific demethylase 4A	KDM4A	O75164
TCMSP	piperine	638024	MXXWOMGUGJBKIW-YPCIICBESA-N	94-62-2	42.52	0.23	Lysine-specific demethylase 4D	KDM4D	Q6B0I6
TCMSP	piperine	638024	MXXWOMGUGJBKIW-YPCIICBESA-N	94-62-2	42.52	0.23	Lysine-specific demethylase 4C	KDM4C	Q9H3R0
TCM-ID	Guineensine	6442405	FPMPOFBEYSSYDQ-AUVZEZIHSA-N	55038-30-7	42.64	0.53	Acyl coenzyme A:cholesterol acyltransferase 1	SOAT1	P35610
TCM-ID	Guineensine	6442405	FPMPOFBEYSSYDQ-AUVZEZIHSA-N	55038-30-7	42.64	0.53	Histone deacetylase 6	HDAC6	Q9UBN7
TCM-ID	Guineensine	6442405	FPMPOFBEYSSYDQ-AUVZEZIHSA-N	55038-30-7	42.64	0.53	Histone deacetylase 3	HDAC3	O15379
TCM-ID	Guineensine	6442405	FPMPOFBEYSSYDQ-AUVZEZIHSA-N	55038-30-7	42.64	0.53	Histone deacetylase 1	HDAC1	Q13547
TCM-ID	Guineensine	6442405	FPMPOFBEYSSYDQ-AUVZEZIHSA-N	55038-30-7	42.64	0.53	Monoamine oxidase B	MAOB	P27338
TCM-ID	Guineensine	6442405	FPMPOFBEYSSYDQ-AUVZEZIHSA-N	55038-30-7	42.64	0.53	Steryl-sulfatase	STS	P08842
TCM-ID	Guineensine	6442405	FPMPOFBEYSSYDQ-AUVZEZIHSA-N	55038-30-7	42.64	0.53	Epoxide hydratase	EPHX2	P34913
TCM-ID	Guineensine	6442405	FPMPOFBEYSSYDQ-AUVZEZIHSA-N	55038-30-7	42.64	0.53	Adenosine A2b receptor	ADORA2B	P29275
TCM-ID	Guineensine	6442405	FPMPOFBEYSSYDQ-AUVZEZIHSA-N	55038-30-7	42.64	0.53	Dihydrofolate reductase (by homology)	DHFR	P00374
TCM-ID	Piperundecalidine	44453654	BADLEYLQAILHPV-AZMZBSBOSA-N	88660-11-1	29.96	0.52	Acyl coenzyme A:cholesterol acyltransferase 1	SOAT1	P35610
TCM-ID	Piperundecalidine	44453654	BADLEYLQAILHPV-AZMZBSBOSA-N	88660-11-1	29.96	0.52	Monoamine oxidase B	MAOB	P27338
TCM-ID	Piperundecalidine	44453654	BADLEYLQAILHPV-AZMZBSBOSA-N	88660-11-1	29.96	0.52	Acetyl-CoA carboxylase 2	ACACB	O00763
TCM-ID	Piperundecalidine	44453654	BADLEYLQAILHPV-AZMZBSBOSA-N	88660-11-1	29.96	0.52	Phosphodiesterase 2A	PDE2A	O00408
TCM-ID	Piperundecalidine	44453654	BADLEYLQAILHPV-AZMZBSBOSA-N	88660-11-1	29.96	0.52	Histone deacetylase 6	HDAC6	Q9UBN7
TCM-ID	Piperundecalidine	44453654	BADLEYLQAILHPV-AZMZBSBOSA-N	88660-11-1	29.96	0.52	Epoxide hydrolase 1	EPHX1	P07099
TCM-ID	Piperundecalidine	44453654	BADLEYLQAILHPV-AZMZBSBOSA-N	88660-11-1	29.96	0.52	Epoxide hydratase	EPHX2	P34913
TCM-ID	Piperundecalidine	44453654	BADLEYLQAILHPV-AZMZBSBOSA-N	88660-11-1	29.96	0.52	Sigma opioid receptor	SIGMAR1	Q99720
TCM-ID	Piperundecalidine	44453654	BADLEYLQAILHPV-AZMZBSBOSA-N	88660-11-1	29.96	0.52	Inhibitor of nuclear factor kappa B kinase beta subunit	IKBKB	O14920
TCM-ID	Piperundecalidine	44453654	BADLEYLQAILHPV-AZMZBSBOSA-N	88660-11-1	29.96	0.52	Serine/threonine-protein kinase Chk2	CHEK2	O96017
TCM-ID	Piperundecalidine	44453654	BADLEYLQAILHPV-AZMZBSBOSA-N	88660-11-1	29.96	0.52	Butyrylcholinesterase	BCHE	P06276
TCM-ID	Piperundecalidine	44453654	BADLEYLQAILHPV-AZMZBSBOSA-N	88660-11-1	29.96	0.52	Acetylcholinesterase	ACHE	P22303
TCM-ID	Piperundecalidine	44453654	BADLEYLQAILHPV-AZMZBSBOSA-N	88660-11-1	29.96	0.52	Histone deacetylase 1	HDAC1	Q13547
TCM-ID	Pipercide	5372162	RPOYGOULCHMVBB-ADDDGJNWSA-N	54794-74-0	42.72	0.43	Acyl coenzyme A:cholesterol acyltransferase 1	SOAT1	P35610
TCM-ID	Pipercide	5372162	RPOYGOULCHMVBB-ADDDGJNWSA-N	54794-74-0	42.72	0.43	Histone deacetylase 6	HDAC6	Q9UBN7
TCM-ID	Pipercide	5372162	RPOYGOULCHMVBB-ADDDGJNWSA-N	54794-74-0	42.72	0.43	Histone deacetylase 1	HDAC1	Q13547
TCM-ID	Pipercide	5372162	RPOYGOULCHMVBB-ADDDGJNWSA-N	54794-74-0	42.72	0.43	Monoamine oxidase B	MAOB	P27338
TCM-ID	Pipercide	5372162	RPOYGOULCHMVBB-ADDDGJNWSA-N	54794-74-0	42.72	0.43	Histone deacetylase 3	HDAC3	O15379
TCM-ID	Pipercide	5372162	RPOYGOULCHMVBB-ADDDGJNWSA-N	54794-74-0	42.72	0.43	Inhibitor of nuclear factor kappa B kinase beta subunit	IKBKB	O14920
TCM-ID	Pipercide	5372162	RPOYGOULCHMVBB-ADDDGJNWSA-N	54794-74-0	42.72	0.43	Acetyl-CoA carboxylase 2	ACACB	O00763
TCM-ID	Pipercide	5372162	RPOYGOULCHMVBB-ADDDGJNWSA-N	54794-74-0	42.72	0.43	Dihydrofolate reductase (by homology)	DHFR	P00374
TCM-ID	Pipercide	5372162	RPOYGOULCHMVBB-ADDDGJNWSA-N	54794-74-0	42.72	0.43	Tyrosine-protein kinase ITK/TSK	ITK	Q08881
TCM-ID	Pipercide	5372162	RPOYGOULCHMVBB-ADDDGJNWSA-N	54794-74-0	42.72	0.43	Sigma opioid receptor	SIGMAR1	Q99720
TCM-ID	Pipercide	5372162	RPOYGOULCHMVBB-ADDDGJNWSA-N	54794-74-0	42.72	0.43	Thrombin	F2	P00734
TCM-ID	Retrofractamide A	11012859	BPSWISYORIWKCT-FCGWLDPVSA-N	94079-67-1	65.9	0.33	Acyl coenzyme A:cholesterol acyltransferase 1	SOAT1	P35610
TCM-ID	Retrofractamide A	11012859	BPSWISYORIWKCT-FCGWLDPVSA-N	94079-67-1	65.9	0.33	Histone deacetylase 1	HDAC1	Q13547
TCM-ID	Retrofractamide A	11012859	BPSWISYORIWKCT-FCGWLDPVSA-N	94079-67-1	65.9	0.33	Histone deacetylase 3	HDAC3	O15379
TCM-ID	Retrofractamide A	11012859	BPSWISYORIWKCT-FCGWLDPVSA-N	94079-67-1	65.9	0.33	Histone deacetylase 6	HDAC6	Q9UBN7
TCM-ID	Retrofractamide A	11012859	BPSWISYORIWKCT-FCGWLDPVSA-N	94079-67-1	65.9	0.33	Monoamine oxidase B	MAOB	P27338
TCM-ID	Retrofractamide A	11012859	BPSWISYORIWKCT-FCGWLDPVSA-N	94079-67-1	65.9	0.33	Acetyl-CoA carboxylase 2	ACACB	O00763
TCM-ID	Retrofractamide A	11012859	BPSWISYORIWKCT-FCGWLDPVSA-N	94079-67-1	65.9	0.33	Troponin, cardiac muscle	TNNC1 TNNT2 TNNI3	P63316 P45379 P19429
TCM-ID	Retrofractamide A	11012859	BPSWISYORIWKCT-FCGWLDPVSA-N	94079-67-1	65.9	0.33	Probable protein-cysteine N-palmitoyltransferase porcupine	PORCN	Q9H237
TCM-ID	Retrofractamide A	11012859	BPSWISYORIWKCT-FCGWLDPVSA-N	94079-67-1	65.9	0.33	NAD-dependent deacetylase sirtuin 3	SIRT3	Q9NTG7
TCM-ID	Retrofractamide A	11012859	BPSWISYORIWKCT-FCGWLDPVSA-N	94079-67-1	65.9	0.33	NAD-dependent deacetylase sirtuin 2	SIRT2	Q8IXJ6
TCM-ID	Retrofractamide A	11012859	BPSWISYORIWKCT-FCGWLDPVSA-N	94079-67-1	65.9	0.33	NAD-dependent deacetylase sirtuin 1	SIRT1	Q96EB6
TCM-ID	Piperlongumine	637858	VABYUUZNAVQNPG-BQYQJAHWSA-N	20069-09-4	96.65	0.24	Monoamine oxidase B	MAOB	P27338
TCM-ID	Piperlongumine	637858	VABYUUZNAVQNPG-BQYQJAHWSA-N	20069-09-4	96.65	0.24	CDK8/Cyclin C	CCNC CDK8	P24863 P49336
TCM-ID	Piperlongumine	637858	VABYUUZNAVQNPG-BQYQJAHWSA-N	20069-09-4	96.65	0.24	Cell division protein kinase 8	CDK8	P49336
TCM-ID	Piperlongumine	637858	VABYUUZNAVQNPG-BQYQJAHWSA-N	20069-09-4	96.65	0.24	MAP kinase p38 alpha	MAPK14	Q16539
TCM-ID	Piperlongumine	637858	VABYUUZNAVQNPG-BQYQJAHWSA-N	20069-09-4	96.65	0.24	N-acylsphingosine-amidohydrolase	NAAA	Q02083
TCM-ID	Piperlongumine	637858	VABYUUZNAVQNPG-BQYQJAHWSA-N	20069-09-4	96.65	0.24	Acid ceramidase	ASAH1	Q13510
TCM-ID	Piperlongumine	637858	VABYUUZNAVQNPG-BQYQJAHWSA-N	20069-09-4	96.65	0.24	Dihydropteridine reductase	QDPR	P09417
TCM-ID	Piperlongumine	637858	VABYUUZNAVQNPG-BQYQJAHWSA-N	20069-09-4	96.65	0.24	Orexin receptor 2	HCRTR2	O43614
TCM-ID	Piperlongumine	637858	VABYUUZNAVQNPG-BQYQJAHWSA-N	20069-09-4	96.65	0.24	Orexin receptor 1	HCRTR1	O43613
TCM-ID	Piperlongumine	637858	VABYUUZNAVQNPG-BQYQJAHWSA-N	20069-09-4	96.65	0.24	Serotonin 1a (5-HT1a) receptor	HTR1A	P08908
TCM-ID	Piperlongumine	637858	VABYUUZNAVQNPG-BQYQJAHWSA-N	20069-09-4	96.65	0.24	Tyrosine-protein kinase SYK	SYK	P43405
TCM-ID	Piperlongumine	637858	VABYUUZNAVQNPG-BQYQJAHWSA-N	20069-09-4	96.65	0.24	Tyrosine-protein kinase JAK3	JAK3	P52333
TCM-ID	Piperlongumine	637858	VABYUUZNAVQNPG-BQYQJAHWSA-N	20069-09-4	96.65	0.24	Tyrosine-protein kinase JAK2	JAK2	O60674
TCM-ID	Piperlongumine	637858	VABYUUZNAVQNPG-BQYQJAHWSA-N	20069-09-4	96.65	0.24	Cyclin-dependent kinase 9	CDK9	P50750
TCM-ID	Piperlongumine	637858	VABYUUZNAVQNPG-BQYQJAHWSA-N	20069-09-4	96.65	0.24	Tyrosine-protein kinase TYK2	TYK2	P29597
TCM-ID	Piperlongumine	637858	VABYUUZNAVQNPG-BQYQJAHWSA-N	20069-09-4	96.65	0.24	Leucine-rich repeat serine/threonine-protein kinase 2	LRRK2	Q5S007
TCM-ID	Piperlongumine	637858	VABYUUZNAVQNPG-BQYQJAHWSA-N	20069-09-4	96.65	0.24	Cytochrome P450 11B1	CYP11B1	P15538
TCM-ID	Piperlongumine	637858	VABYUUZNAVQNPG-BQYQJAHWSA-N	20069-09-4	96.65	0.24	Cytochrome P450 11B2	CYP11B2	P19099
TCM-ID	Piperlongumine	637858	VABYUUZNAVQNPG-BQYQJAHWSA-N	20069-09-4	96.65	0.24	Acetylcholinesterase	ACHE	P22303
TCM-ID	Piperlongumine	637858	VABYUUZNAVQNPG-BQYQJAHWSA-N	20069-09-4	96.65	0.24	Type-1 angiotensin II receptor (by homology)	AGTR1	P30556
TCM-ID	Piperlongumine	637858	VABYUUZNAVQNPG-BQYQJAHWSA-N	20069-09-4	96.65	0.24	Serotonin 2a (5-HT2a) receptor	HTR2A	P28223
TCM-ID	Piperlongumine	637858	VABYUUZNAVQNPG-BQYQJAHWSA-N	20069-09-4	96.65	0.24	Ribosomal protein S6 kinase 1	RPS6KB1	P23443
TCM-ID	Piperlongumine	637858	VABYUUZNAVQNPG-BQYQJAHWSA-N	20069-09-4	96.65	0.24	Poly [ADP-ribose] polymerase-1	PARP1	P09874
TCM-ID	Piperlongumine	637858	VABYUUZNAVQNPG-BQYQJAHWSA-N	20069-09-4	96.65	0.24	Tankyrase-1	TNKS	O95271
TCM-ID	Piperlongumine	637858	VABYUUZNAVQNPG-BQYQJAHWSA-N	20069-09-4	96.65	0.24	Cyclooxygenase-2	PTGS2	P35354
TCM-ID	Piperlongumine	637858	VABYUUZNAVQNPG-BQYQJAHWSA-N	20069-09-4	96.65	0.24	PI3-kinase p110-delta subunit	PIK3CD	O00329
TCM-ID	Piperlongumine	637858	VABYUUZNAVQNPG-BQYQJAHWSA-N	20069-09-4	96.65	0.24	PI3-kinase p110-beta subunit	PIK3CB	P42338
TCM-ID	Piperlongumine	637858	VABYUUZNAVQNPG-BQYQJAHWSA-N	20069-09-4	96.65	0.24	Phosphodiesterase 4B	PDE4B	Q07343
TCM-ID	Piperlongumine	637858	VABYUUZNAVQNPG-BQYQJAHWSA-N	20069-09-4	96.65	0.24	NADPH oxidase 4	NOX4	Q9NPH5
TCM-ID	Piperlongumine	637858	VABYUUZNAVQNPG-BQYQJAHWSA-N	20069-09-4	96.65	0.24	Cytochrome b-245 heavy chain	CYBB	P04839
TCM-ID	Piperlongumine	637858	VABYUUZNAVQNPG-BQYQJAHWSA-N	20069-09-4	96.65	0.24	NADPH oxidase 1	NOX1	Q9Y5S8
TCM-ID	Piperlongumine	637858	VABYUUZNAVQNPG-BQYQJAHWSA-N	20069-09-4	96.65	0.24	Adenosine A1 receptor (by homology)	ADORA1	P30542
TCM-ID	Piperlongumine	637858	VABYUUZNAVQNPG-BQYQJAHWSA-N	20069-09-4	96.65	0.24	Adenosine A2a receptor (by homology)	ADORA2A	P29274
TCM-ID	Piperlongumine	637858	VABYUUZNAVQNPG-BQYQJAHWSA-N	20069-09-4	96.65	0.24	Phosphodiesterase 4D	PDE4D	Q08499
TCM-ID	Piperlongumine	637858	VABYUUZNAVQNPG-BQYQJAHWSA-N	20069-09-4	96.65	0.24	C-C chemokine receptor type 1	CCR1	P32246
TCM-ID	Piperlongumine	637858	VABYUUZNAVQNPG-BQYQJAHWSA-N	20069-09-4	96.65	0.24	MAP kinase signal-integrating kinase 2	MKNK2	Q9HBH9
TCM-ID	Piperlongumine	637858	VABYUUZNAVQNPG-BQYQJAHWSA-N	20069-09-4	96.65	0.24	Sodium/glucose cotransporter 1	SLC5A1	P13866
TCM-ID	Piperlongumine	637858	VABYUUZNAVQNPG-BQYQJAHWSA-N	20069-09-4	96.65	0.24	Rho-associated protein kinase 2	ROCK2	O75116
TCM-ID	Piperlongumine	637858	VABYUUZNAVQNPG-BQYQJAHWSA-N	20069-09-4	96.65	0.24	Branched-chain-amino-acid aminotransferase, mitochondrial	BCAT2	O15382
TCM-ID	Piperlongumine	637858	VABYUUZNAVQNPG-BQYQJAHWSA-N	20069-09-4	96.65	0.24	Lysine-specific demethylase 5B	KDM5B	Q9UGL1
TCM-ID	Piperlongumine	637858	VABYUUZNAVQNPG-BQYQJAHWSA-N	20069-09-4	96.65	0.24	Serine-protein kinase ATM	ATM	Q13315
TCM-ID	Piperlongumine	637858	VABYUUZNAVQNPG-BQYQJAHWSA-N	20069-09-4	96.65	0.24	Caspase-3	CASP3	P42574
TCM-ID	Piperlongumine	637858	VABYUUZNAVQNPG-BQYQJAHWSA-N	20069-09-4	96.65	0.24	Matrix metalloproteinase 13	MMP13	P45452
TCM-ID	Piperlongumine	637858	VABYUUZNAVQNPG-BQYQJAHWSA-N	20069-09-4	96.65	0.24	Matrix metalloproteinase 3	MMP3	P08254
TCM-ID	Piperlongumine	637858	VABYUUZNAVQNPG-BQYQJAHWSA-N	20069-09-4	96.65	0.24	Caspase-7	CASP7	P55210
TCM-ID	Piperlongumine	637858	VABYUUZNAVQNPG-BQYQJAHWSA-N	20069-09-4	96.65	0.24	Matrix metalloproteinase 8	MMP8	P22894
TCM-ID	Piperlongumine	637858	VABYUUZNAVQNPG-BQYQJAHWSA-N	20069-09-4	96.65	0.24	Histone deacetylase 6	HDAC6	Q9UBN7
TCM-ID	Piperlongumine	637858	VABYUUZNAVQNPG-BQYQJAHWSA-N	20069-09-4	96.65	0.24	CDK9/cyclin T1	CDK9 CCNT1	P50750 O60563
TCM-ID	Piperlongumine	637858	VABYUUZNAVQNPG-BQYQJAHWSA-N	20069-09-4	96.65	0.24	Beta-glucuronidase	GUSB	P08236
TCM-ID	Piperlongumine	637858	VABYUUZNAVQNPG-BQYQJAHWSA-N	20069-09-4	96.65	0.24	Protein-glutamine gamma-glutamyltransferase	TGM2	P21980
TCM-ID	Piperlongumine	637858	VABYUUZNAVQNPG-BQYQJAHWSA-N	20069-09-4	96.65	0.24	Neuropeptides B/W receptor type 1	NPBWR1	P48145
TCM-ID	Piperlongumine	637858	VABYUUZNAVQNPG-BQYQJAHWSA-N	20069-09-4	96.65	0.24	c-Jun N-terminal kinase 3	MAPK10	P53779
TCM-ID	Piperlongumine	637858	VABYUUZNAVQNPG-BQYQJAHWSA-N	20069-09-4	96.65	0.24	Nerve growth factor receptor Trk-A	NTRK1	P04629
TCM-ID	Piperlongumine	637858	VABYUUZNAVQNPG-BQYQJAHWSA-N	20069-09-4	96.65	0.24	Metabotropic glutamate receptor 5 (by homology)	GRM5	P41594
TCM-ID	Piperlongumine	637858	VABYUUZNAVQNPG-BQYQJAHWSA-N	20069-09-4	96.65	0.24	Acyl coenzyme A:cholesterol acyltransferase	CES1	P23141
TCM-ID	Piperlongumine	637858	VABYUUZNAVQNPG-BQYQJAHWSA-N	20069-09-4	96.65	0.24	Phosphodiesterase 3	PDE3A	Q14432
TCM-ID	Piperlongumine	637858	VABYUUZNAVQNPG-BQYQJAHWSA-N	20069-09-4	96.65	0.24	Phosphodiesterase 3B	PDE3B	Q13370
TCM-ID	Piperlongumine	637858	VABYUUZNAVQNPG-BQYQJAHWSA-N	20069-09-4	96.65	0.24	Serine/threonine-protein kinase PLK1	PLK1	P53350
TCM-ID	Piperlongumine	637858	VABYUUZNAVQNPG-BQYQJAHWSA-N	20069-09-4	96.65	0.24	Carboxylesterase 2	CES2	O00748
TCM-ID	Piperlongumine	637858	VABYUUZNAVQNPG-BQYQJAHWSA-N	20069-09-4	96.65	0.24	Inhibitor of nuclear factor kappa B kinase epsilon subunit	IKBKE	Q14164
TCM-ID	Piperlongumine	637858	VABYUUZNAVQNPG-BQYQJAHWSA-N	20069-09-4	96.65	0.24	Serine/threonine-protein kinase TBK1	TBK1	Q9UHD2
TCM-ID	Piperlongumine	637858	VABYUUZNAVQNPG-BQYQJAHWSA-N	20069-09-4	96.65	0.24	Regulator of G-protein signaling 4	RGS4	P49798
TCM-ID	Piperlongumine	637858	VABYUUZNAVQNPG-BQYQJAHWSA-N	20069-09-4	96.65	0.24	Serine/threonine-protein kinase RAF (by homology)	RAF1	P04049
TCM-ID	Piperlongumine	637858	VABYUUZNAVQNPG-BQYQJAHWSA-N	20069-09-4	96.65	0.24	Adenosine A2b receptor	ADORA2B	P29275
TCM-ID	Piperlongumine	637858	VABYUUZNAVQNPG-BQYQJAHWSA-N	20069-09-4	96.65	0.24	Hydroxycarboxylic acid receptor 2	HCAR2	Q8TDS4
TCM-ID	Piperlongumine	637858	VABYUUZNAVQNPG-BQYQJAHWSA-N	20069-09-4	96.65	0.24	MAP kinase p38 beta	MAPK11	Q15759
TCM-ID	Piperlongumine	637858	VABYUUZNAVQNPG-BQYQJAHWSA-N	20069-09-4	96.65	0.24	Dual specificity protein kinase TTK	TTK	P33981
TCM-ID	Piperlongumine	637858	VABYUUZNAVQNPG-BQYQJAHWSA-N	20069-09-4	96.65	0.24	Phosphodiesterase 10A	PDE10A	Q9Y233
TCM-ID	Piperlongumine	637858	VABYUUZNAVQNPG-BQYQJAHWSA-N	20069-09-4	96.65	0.24	Serine/threonine-protein kinase PLK3	PLK3	Q9H4B4
TCM-ID	Piperlongumine	637858	VABYUUZNAVQNPG-BQYQJAHWSA-N	20069-09-4	96.65	0.24	Serine/threonine-protein kinase B-raf (by homology)	BRAF	P15056
TCM-ID	Piperlongumine	637858	VABYUUZNAVQNPG-BQYQJAHWSA-N	20069-09-4	96.65	0.24	Serine/threonine-protein kinase PLK2	PLK2	Q9NYY3
TCM-ID	Piperlongumine	637858	VABYUUZNAVQNPG-BQYQJAHWSA-N	20069-09-4	96.65	0.24	Tyrosine-protein kinase ABL	ABL1	P00519
TCM-ID	Piperlongumine	637858	VABYUUZNAVQNPG-BQYQJAHWSA-N	20069-09-4	96.65	0.24	Glutamate NMDA receptor; GRIN1/GRIN2A	GRIN2A GRIN1	Q12879 Q05586
TCM-ID	Piperlongumine	637858	VABYUUZNAVQNPG-BQYQJAHWSA-N	20069-09-4	96.65	0.24	Tyrosine-protein kinase SRC	SRC	P12931
TCM-ID	Piperlongumine	637858	VABYUUZNAVQNPG-BQYQJAHWSA-N	20069-09-4	96.65	0.24	Serine/threonine-protein kinase mTOR	MTOR	P42345
TCM-ID	Piperlongumine	637858	VABYUUZNAVQNPG-BQYQJAHWSA-N	20069-09-4	96.65	0.24	DNA-dependent protein kinase	PRKDC	P78527
TCM-ID	Piperlongumine	637858	VABYUUZNAVQNPG-BQYQJAHWSA-N	20069-09-4	96.65	0.24	Tyrosine-protein kinase HCK	HCK	P08631
TCM-ID	Piperlongumine	637858	VABYUUZNAVQNPG-BQYQJAHWSA-N	20069-09-4	96.65	0.24	PI4-kinase beta subunit	PI4KB	Q9UBF8
TCM-ID	Piperlongumine	637858	VABYUUZNAVQNPG-BQYQJAHWSA-N	20069-09-4	96.65	0.24	Glutamate receptor ionotropic, AMPA 2	GRIA2	P42262
TCM-ID	Piperlongumine	637858	VABYUUZNAVQNPG-BQYQJAHWSA-N	20069-09-4	96.65	0.24	Matrix metalloproteinase 10	MMP10	P09238
TCM-ID	Piperlongumine	637858	VABYUUZNAVQNPG-BQYQJAHWSA-N	20069-09-4	96.65	0.24	Protein tyrosine kinase 2 beta	PTK2B	Q14289
TCM-ID	Piperlongumine	637858	VABYUUZNAVQNPG-BQYQJAHWSA-N	20069-09-4	96.65	0.24	FK506-binding protein 1A	FKBP1A	P62942
TCM-ID	Piperlongumine	637858	VABYUUZNAVQNPG-BQYQJAHWSA-N	20069-09-4	96.65	0.24	Long-chain fatty acid transport protein 1	SLC27A1	Q6PCB7
TCM-ID	Piperlongumine	637858	VABYUUZNAVQNPG-BQYQJAHWSA-N	20069-09-4	96.65	0.24	Protein kinase N2	PKN2	Q16513
TCM-ID	Piperlongumine	637858	VABYUUZNAVQNPG-BQYQJAHWSA-N	20069-09-4	96.65	0.24	Rho-associated protein kinase 1	ROCK1	Q13464
TCM-ID	Piperlongumine	637858	VABYUUZNAVQNPG-BQYQJAHWSA-N	20069-09-4	96.65	0.24	Adenosine kinase	ADK	P55263
TCM-ID	Piperlongumine	637858	VABYUUZNAVQNPG-BQYQJAHWSA-N	20069-09-4	96.65	0.24	Cell division control protein 42 homolog	CDC42	P60953
TCM-ID	Piperlongumine	637858	VABYUUZNAVQNPG-BQYQJAHWSA-N	20069-09-4	96.65	0.24	Trace amine-associated receptor 1 (by homology)	TAAR1	Q96RJ0
TCM-ID	Piperlongumine	637858	VABYUUZNAVQNPG-BQYQJAHWSA-N	20069-09-4	96.65	0.24	GABA-A receptor; alpha-3/beta-3/gamma-2	GABRB3 GABRA3 GABRG2	P28472 P34903 P18507
TCM-ID	Piperlongumine	637858	VABYUUZNAVQNPG-BQYQJAHWSA-N	20069-09-4	96.65	0.24	GABA-A receptor; alpha-1/beta-3/gamma-2	GABRB3 GABRG2 GABRA1	P28472 P18507 P14867
TCM-ID	Piperlongumine	637858	VABYUUZNAVQNPG-BQYQJAHWSA-N	20069-09-4	96.65	0.24	GABA-A receptor; alpha-5/beta-3/gamma-2	GABRB3 GABRG2 GABRA5	P28472 P18507 P31644
TCM-ID	Piperlongumine	637858	VABYUUZNAVQNPG-BQYQJAHWSA-N	20069-09-4	96.65	0.24	GABA-A receptor; alpha-2/beta-3/gamma-2	GABRA2 GABRB3 GABRG2	P47869 P28472 P18507
TCM-ID	Piperlongumine	637858	VABYUUZNAVQNPG-BQYQJAHWSA-N	20069-09-4	96.65	0.24	EZH2/SUZ12/EED/RBBP7/RBBP4	EZH2	Q15910
TCM-ID	Piperlongumine	637858	VABYUUZNAVQNPG-BQYQJAHWSA-N	20069-09-4	96.65	0.24	Thrombin and coagulation factor X	F10	P00742
TCM-ID	Piperlongumine	637858	VABYUUZNAVQNPG-BQYQJAHWSA-N	20069-09-4	96.65	0.24	Corticotropin releasing factor receptor 1 (by homology)	CRHR1	P34998
TCM-ID	Piperlongumine	637858	VABYUUZNAVQNPG-BQYQJAHWSA-N	20069-09-4	96.65	0.24	Cyclin-dependent kinase 4/cyclin D	CCND3 CCND1 CDK4 CCND2	P30281 P24385 P11802 P30279
TCM-ID	Piperlongumine	637858	VABYUUZNAVQNPG-BQYQJAHWSA-N	20069-09-4	96.65	0.24	c-Jun N-terminal kinase 1	MAPK8	P45983
TCM-ID	Piperlongumine	637858	VABYUUZNAVQNPG-BQYQJAHWSA-N	20069-09-4	96.65	0.24	Hexokinase type IV	GCK	P35557
TCM-ID	Piperlongumine	637858	VABYUUZNAVQNPG-BQYQJAHWSA-N	20069-09-4	96.65	0.24	Heat shock protein HSP 90-alpha	HSP90AA1	P07900
TCM-ID	Piperlongumine	637858	VABYUUZNAVQNPG-BQYQJAHWSA-N	20069-09-4	96.65	0.24	TGF-beta receptor type I	TGFBR1	P36897
TCM-ID	Piperlonguminine	5320621	WHAAPCGHVWVUEX-GGWOSOGESA-N	5950-12_9	30.71	0.18	Monoamine oxidase B	MAOB	P27338
TCM-ID	Piperlonguminine	5320621	WHAAPCGHVWVUEX-GGWOSOGESA-N	5950-12_9	30.71	0.18	Sigma opioid receptor	SIGMAR1	Q99720
TCM-ID	Piperlonguminine	5320621	WHAAPCGHVWVUEX-GGWOSOGESA-N	5950-12_9	30.71	0.18	Acyl coenzyme A:cholesterol acyltransferase 1	SOAT1	P35610
TCM-ID	Piperlonguminine	5320621	WHAAPCGHVWVUEX-GGWOSOGESA-N	5950-12_9	30.71	0.18	Diacylglycerol O-acyltransferase 1	DGAT1	O75907
TCM-ID	Piperlonguminine	5320621	WHAAPCGHVWVUEX-GGWOSOGESA-N	5950-12_9	30.71	0.18	Acetyl-CoA carboxylase 2	ACACB	O00763
TCM-ID	Piperlonguminine	5320621	WHAAPCGHVWVUEX-GGWOSOGESA-N	5950-12_9	30.71	0.18	Perforin-1	PRF1	P14222
TCM-ID	Piperlonguminine	5320621	WHAAPCGHVWVUEX-GGWOSOGESA-N	5950-12_9	30.71	0.18	Epoxide hydratase	EPHX2	P34913
TCM-ID	Piperlonguminine	5320621	WHAAPCGHVWVUEX-GGWOSOGESA-N	5950-12_9	30.71	0.18	MAP kinase ERK1	MAPK3	P27361
TCM-ID	Piperlonguminine	5320621	WHAAPCGHVWVUEX-GGWOSOGESA-N	5950-12_9	30.71	0.18	Indoleamine 2,3-dioxygenase	IDO1	P14902
TCM-ID	Piperlonguminine	5320621	WHAAPCGHVWVUEX-GGWOSOGESA-N	5950-12_9	30.71	0.18	Tyrosine-protein kinase SRC	SRC	P12931
TCM-ID	Piperlonguminine	5320621	WHAAPCGHVWVUEX-GGWOSOGESA-N	5950-12_9	30.71	0.18	Estrogen receptor beta	ESR2	Q92731
TCM-ID	Piperlonguminine	5320621	WHAAPCGHVWVUEX-GGWOSOGESA-N	5950-12_9	30.71	0.18	Thrombin and coagulation factor X	F10	P00742
TCM-ID	Piperlonguminine	5320621	WHAAPCGHVWVUEX-GGWOSOGESA-N	5950-12_9	30.71	0.18	Vascular endothelial growth factor receptor 2	KDR	P35968
TCM-ID	Piperlonguminine	5320621	WHAAPCGHVWVUEX-GGWOSOGESA-N	5950-12_9	30.71	0.18	Phosphodiesterase 4D	PDE4D	Q08499
TCM-ID	Piperlonguminine	5320621	WHAAPCGHVWVUEX-GGWOSOGESA-N	5950-12_9	30.71	0.18	Transient receptor potential cation channel subfamily M member 8 (by homology)	TRPM8	Q7Z2W7
TCM-ID	Piperlonguminine	5320621	WHAAPCGHVWVUEX-GGWOSOGESA-N	5950-12_9	30.71	0.18	Vanilloid receptor	TRPV1	Q8NER1
TCM-ID	Piperlonguminine	5320621	WHAAPCGHVWVUEX-GGWOSOGESA-N	5950-12_9	30.71	0.18	N-acylsphingosine-amidohydrolase (by homology)	NAAA	Q02083
TCM-ID	Piperlonguminine	5320621	WHAAPCGHVWVUEX-GGWOSOGESA-N	5950-12_9	30.71	0.18	Tyrosine-protein kinase ITK/TSK	ITK	Q08881
TCM-ID	Piperlonguminine	5320621	WHAAPCGHVWVUEX-GGWOSOGESA-N	5950-12_9	30.71	0.18	CDK2/Cyclin A	CCNA2 CDK2	P20248 P24941
TCM-ID	Piperlonguminine	5320621	WHAAPCGHVWVUEX-GGWOSOGESA-N	5950-12_9	30.71	0.18	Nicotinamide phosphoribosyltransferase	NAMPT	P43490
TCM-ID	Piperlonguminine	5320621	WHAAPCGHVWVUEX-GGWOSOGESA-N	5950-12_9	30.71	0.18	Cyclin-dependent kinase 2/cyclin A	CDK2 CCNA1 CCNA2	P24941 P78396 P20248
TCM-ID	Piperlonguminine	5320621	WHAAPCGHVWVUEX-GGWOSOGESA-N	5950-12_9	30.71	0.18	Serine/threonine-protein kinase Aurora-A	AURKA	O14965
TCM-ID	Piperlonguminine	5320621	WHAAPCGHVWVUEX-GGWOSOGESA-N	5950-12_9	30.71	0.18	Calcitonin gene-related peptide type 1 receptor	CALCRL	Q16602
TCM-ID	Piperlonguminine	5320621	WHAAPCGHVWVUEX-GGWOSOGESA-N	5950-12_9	30.71	0.18	Serine/threonine-protein kinase AKT	AKT3	Q9Y243
TCM-ID	Piperlonguminine	5320621	WHAAPCGHVWVUEX-GGWOSOGESA-N	5950-12_9	30.71	0.18	Phosphodiesterase 10A	PDE10A	Q9Y233
TCM-ID	Piperlonguminine	5320621	WHAAPCGHVWVUEX-GGWOSOGESA-N	5950-12_9	30.71	0.18	Histone deacetylase 6	HDAC6	Q9UBN7
TCM-ID	Piperlonguminine	5320621	WHAAPCGHVWVUEX-GGWOSOGESA-N	5950-12_9	30.71	0.18	Adenosine A2a receptor	ADORA2A	P29274
TCM-ID	Piperlonguminine	5320621	WHAAPCGHVWVUEX-GGWOSOGESA-N	5950-12_9	30.71	0.18	Cyclin-dependent kinase 2	CDK2	P24941
TCM-ID	Piperlonguminine	5320621	WHAAPCGHVWVUEX-GGWOSOGESA-N	5950-12_9	30.71	0.18	Cyclin-dependent kinase 1	CDK1	P06493
TCM-ID	Piperlonguminine	5320621	WHAAPCGHVWVUEX-GGWOSOGESA-N	5950-12_9	30.71	0.18	Dual specificity protein kinase TTK	TTK	P33981
TCM-ID	Piperlonguminine	5320621	WHAAPCGHVWVUEX-GGWOSOGESA-N	5950-12_9	30.71	0.18	Sodium channel protein type IX alpha subunit	SCN9A	Q15858
TCM-ID	Piperlonguminine	5320621	WHAAPCGHVWVUEX-GGWOSOGESA-N	5950-12_9	30.71	0.18	Metabotropic glutamate receptor 2	GRM2	Q14416
TCM-ID	Piperlonguminine	5320621	WHAAPCGHVWVUEX-GGWOSOGESA-N	5950-12_9	30.71	0.18	Cyclin-dependent kinase 1/cyclin B1	CDK1 CCNB1	P06493 P14635
TCM-ID	Piperlonguminine	5320621	WHAAPCGHVWVUEX-GGWOSOGESA-N	5950-12_9	30.71	0.18	Anandamide amidohydrolase	FAAH	O00519
TCM-ID	Piperlonguminine	5320621	WHAAPCGHVWVUEX-GGWOSOGESA-N	5950-12_9	30.71	0.18	CDC7/DBF4 (Cell division cycle 7-related protein kinase/Activator of S phase kinase)	CDC7	O00311
TCM-ID	Piperlonguminine	5320621	WHAAPCGHVWVUEX-GGWOSOGESA-N	5950-12_9	30.71	0.18	6-phosphofructo-2-kinase/fructose-2,6-bisphosphatase 3	PFKFB3	Q16875
TCM-ID	Piperlonguminine	5320621	WHAAPCGHVWVUEX-GGWOSOGESA-N	5950-12_9	30.71	0.18	Serine/threonine-protein kinase mTOR	MTOR	P42345
TCM-ID	Piperlonguminine	5320621	WHAAPCGHVWVUEX-GGWOSOGESA-N	5950-12_9	30.71	0.18	Tyrosine-protein kinase JAK2	JAK2	O60674
TCM-ID	Piperlonguminine	5320621	WHAAPCGHVWVUEX-GGWOSOGESA-N	5950-12_9	30.71	0.18	Leucine-rich repeat serine/threonine-protein kinase 2	LRRK2	Q5S007
TCM-ID	Piperlonguminine	5320621	WHAAPCGHVWVUEX-GGWOSOGESA-N	5950-12_9	30.71	0.18	Inhibitor of nuclear factor kappa B kinase beta subunit	IKBKB	O14920
TCM-ID	Piperlonguminine	5320621	WHAAPCGHVWVUEX-GGWOSOGESA-N	5950-12_9	30.71	0.18	Adenosine A1 receptor	ADORA1	P30542
TCM-ID	Piperlonguminine	5320621	WHAAPCGHVWVUEX-GGWOSOGESA-N	5950-12_9	30.71	0.18	Sphingosine 1-phosphate receptor Edg-1	S1PR1	P21453
TCM-ID	Piperlonguminine	5320621	WHAAPCGHVWVUEX-GGWOSOGESA-N	5950-12_9	30.71	0.18	HERG	KCNH2	Q12809
TCM-ID	Piperlonguminine	5320621	WHAAPCGHVWVUEX-GGWOSOGESA-N	5950-12_9	30.71	0.18	Insulin receptor	INSR	P06213
TCM-ID	Piperlonguminine	5320621	WHAAPCGHVWVUEX-GGWOSOGESA-N	5950-12_9	30.71	0.18	Nerve growth factor receptor Trk-A	NTRK1	P04629
TCM-ID	Piperlonguminine	5320621	WHAAPCGHVWVUEX-GGWOSOGESA-N	5950-12_9	30.71	0.18	PI4-kinase beta subunit	PI4KB	Q9UBF8
TCM-ID	Piperlonguminine	5320621	WHAAPCGHVWVUEX-GGWOSOGESA-N	5950-12_9	30.71	0.18	Fibroblast growth factor receptor 1	FGFR1	P11362
TCM-ID	Piperlonguminine	5320621	WHAAPCGHVWVUEX-GGWOSOGESA-N	5950-12_9	30.71	0.18	PI4-kinase alpha subunit	PI4KA	P42356
TCM-ID	Piperlonguminine	5320621	WHAAPCGHVWVUEX-GGWOSOGESA-N	5950-12_9	30.71	0.18	Cathepsin (B and K)	CTSB	P07858
TCM-ID	Piperlonguminine	5320621	WHAAPCGHVWVUEX-GGWOSOGESA-N	5950-12_9	30.71	0.18	MAP kinase-activated protein kinase 2	MAPKAPK2	P49137
TCM-ID	Piperlonguminine	5320621	WHAAPCGHVWVUEX-GGWOSOGESA-N	5950-12_9	30.71	0.18	Ribosomal protein S6 kinase alpha 3	RPS6KA3	P51812
TCM-ID	Piperlonguminine	5320621	WHAAPCGHVWVUEX-GGWOSOGESA-N	5950-12_9	30.71	0.18	Nuclear receptor ROR-gamma	RORC	P51449
TCM-ID	Piperlonguminine	5320621	WHAAPCGHVWVUEX-GGWOSOGESA-N	5950-12_9	30.71	0.18	Tyrosine-protein kinase JAK3	JAK3	P52333
TCM-ID	Piperlonguminine	5320621	WHAAPCGHVWVUEX-GGWOSOGESA-N	5950-12_9	30.71	0.18	c-Jun N-terminal kinase 1	MAPK8	P45983
TCM-ID	Piperlonguminine	5320621	WHAAPCGHVWVUEX-GGWOSOGESA-N	5950-12_9	30.71	0.18	Cystic fibrosis transmembrane conductance regulator	CFTR	P13569
TCM-ID	Piperlonguminine	5320621	WHAAPCGHVWVUEX-GGWOSOGESA-N	5950-12_9	30.71	0.18	Macrophage colony stimulating factor receptor	CSF1R	P07333
TCM-ID	Piperlonguminine	5320621	WHAAPCGHVWVUEX-GGWOSOGESA-N	5950-12_9	30.71	0.18	Platelet-derived growth factor receptor alpha	PDGFRA	P16234
TCM-ID	Piperlonguminine	5320621	WHAAPCGHVWVUEX-GGWOSOGESA-N	5950-12_9	30.71	0.18	Serine/threonine-protein kinase Chk2	CHEK2	O96017
TCM-ID	Piperlonguminine	5320621	WHAAPCGHVWVUEX-GGWOSOGESA-N	5950-12_9	30.71	0.18	Poly [ADP-ribose] polymerase-1	PARP1	P09874
TCM-ID	Piperlonguminine	5320621	WHAAPCGHVWVUEX-GGWOSOGESA-N	5950-12_9	30.71	0.18	LIM domain kinase 1	LIMK1	P53667
TCM-ID	Piperlonguminine	5320621	WHAAPCGHVWVUEX-GGWOSOGESA-N	5950-12_9	30.71	0.18	Neuropeptide Y receptor type 5	NPY5R	Q15761
TCM-ID	Piperlonguminine	5320621	WHAAPCGHVWVUEX-GGWOSOGESA-N	5950-12_9	30.71	0.18	Serine/threonine-protein kinase Chk1	CHEK1	O14757
TCM-ID	Piperlonguminine	5320621	WHAAPCGHVWVUEX-GGWOSOGESA-N	5950-12_9	30.71	0.18	LIM domain kinase 2	LIMK2	P53671
TCM-ID	Piperlonguminine	5320621	WHAAPCGHVWVUEX-GGWOSOGESA-N	5950-12_9	30.71	0.18	Ketohexokinase	KHK	P50053
TCM-ID	Piperlonguminine	5320621	WHAAPCGHVWVUEX-GGWOSOGESA-N	5950-12_9	30.71	0.18	Progesterone receptor	PGR	P06401
TCM-ID	Piperlonguminine	5320621	WHAAPCGHVWVUEX-GGWOSOGESA-N	5950-12_9	30.71	0.18	Serine/threonine-protein kinase Aurora-B	AURKB	Q96GD4
TCM-ID	Piperlonguminine	5320621	WHAAPCGHVWVUEX-GGWOSOGESA-N	5950-12_9	30.71	0.18	Rho-associated protein kinase 2	ROCK2	O75116
TCM-ID	Piperlonguminine	5320621	WHAAPCGHVWVUEX-GGWOSOGESA-N	5950-12_9	30.71	0.18	Metabotropic glutamate receptor 5 (by homology)	GRM5	P41594
TCM-ID	Piperlonguminine	5320621	WHAAPCGHVWVUEX-GGWOSOGESA-N	5950-12_9	30.71	0.18	Phospholipase A2 group IIA	PLA2G2A	P14555
TCM-ID	Piperlonguminine	5320621	WHAAPCGHVWVUEX-GGWOSOGESA-N	5950-12_9	30.71	0.18	Serine/threonine-protein kinase B-raf	BRAF	P15056
TCM-ID	Piperlonguminine	5320621	WHAAPCGHVWVUEX-GGWOSOGESA-N	5950-12_9	30.71	0.18	Corticotropin releasing factor receptor 1	CRHR1	P34998
TCM-ID	Piperlonguminine	5320621	WHAAPCGHVWVUEX-GGWOSOGESA-N	5950-12_9	30.71	0.18	Epoxide hydrolase 1	EPHX1	P07099
TCM-ID	Piperlonguminine	5320621	WHAAPCGHVWVUEX-GGWOSOGESA-N	5950-12_9	30.71	0.18	Phosphodiesterase 3	PDE3A	Q14432
TCM-ID	Piperlonguminine	5320621	WHAAPCGHVWVUEX-GGWOSOGESA-N	5950-12_9	30.71	0.18	Phosphodiesterase 3B	PDE3B	Q13370
TCM-ID	Piperlonguminine	5320621	WHAAPCGHVWVUEX-GGWOSOGESA-N	5950-12_9	30.71	0.18	NAD-dependent deacetylase sirtuin 3	SIRT3	Q9NTG7
TCM-ID	Piperlonguminine	5320621	WHAAPCGHVWVUEX-GGWOSOGESA-N	5950-12_9	30.71	0.18	Rhodopsin kinase	GRK1	Q15835
TCM-ID	Piperlonguminine	5320621	WHAAPCGHVWVUEX-GGWOSOGESA-N	5950-12_9	30.71	0.18	G protein-coupled receptor kinase 5	GRK5	P34947
TCM-ID	Piperlonguminine	5320621	WHAAPCGHVWVUEX-GGWOSOGESA-N	5950-12_9	30.71	0.18	Tyrosine-protein kinase ABL	ABL1	P00519
TCM-ID	Piperlonguminine	5320621	WHAAPCGHVWVUEX-GGWOSOGESA-N	5950-12_9	30.71	0.18	Sodium channel protein type IV alpha subunit	SCN4A	P35499
TCM-ID	Piperlonguminine	5320621	WHAAPCGHVWVUEX-GGWOSOGESA-N	5950-12_9	30.71	0.18	Potassium-transporting ATPase	ATP4B ATP4A	P51164 P20648
TCM-ID	Piperlonguminine	5320621	WHAAPCGHVWVUEX-GGWOSOGESA-N	5950-12_9	30.71	0.18	Dopamine D1 receptor	DRD1	P21728
TCM-ID	Piperlonguminine	5320621	WHAAPCGHVWVUEX-GGWOSOGESA-N	5950-12_9	30.71	0.18	Rho-associated protein kinase 1	ROCK1	Q13464
TCM-ID	Piperlonguminine	5320621	WHAAPCGHVWVUEX-GGWOSOGESA-N	5950-12_9	30.71	0.18	NAD-dependent deacetylase sirtuin 1	SIRT1	Q96EB6
LTM-TCM	Laurotetanine	267400	GVVXPMORGFYVOO-UHFFFAOYSA-N	128-76-7	55.41	0.51	Neuronal acetylcholine receptor; alpha4/beta2	CHRNA4 CHRNB2	P43681 P17787
LTM-TCM	Laurotetanine	267400	GVVXPMORGFYVOO-UHFFFAOYSA-N	128-76-7	55.41	0.51	Dopamine D2 receptor (by homology)	DRD2	P14416
LTM-TCM	Laurotetanine	267400	GVVXPMORGFYVOO-UHFFFAOYSA-N	128-76-7	55.41	0.51	Alpha-1a adrenergic receptor (by homology)	ADRA1A	P35348
LTM-TCM	Laurotetanine	267400	GVVXPMORGFYVOO-UHFFFAOYSA-N	128-76-7	55.41	0.51	Serotonin 2b (5-HT2b) receptor	HTR2B	P41595
LTM-TCM	Laurotetanine	267400	GVVXPMORGFYVOO-UHFFFAOYSA-N	128-76-7	55.41	0.51	Dopamine D1 receptor	DRD1	P21728
LTM-TCM	Laurotetanine	267400	GVVXPMORGFYVOO-UHFFFAOYSA-N	128-76-7	55.41	0.51	Serotonin 1a (5-HT1a) receptor	HTR1A	P08908
LTM-TCM	Laurotetanine	267400	GVVXPMORGFYVOO-UHFFFAOYSA-N	128-76-7	55.41	0.51	Serotonin 7 (5-HT7) receptor	HTR7	P34969
LTM-TCM	Laurotetanine	267400	GVVXPMORGFYVOO-UHFFFAOYSA-N	128-76-7	55.41	0.51	Serotonin 6 (5-HT6) receptor	HTR6	P50406
LTM-TCM	Laurotetanine	267400	GVVXPMORGFYVOO-UHFFFAOYSA-N	128-76-7	55.41	0.51	Serotonin 5a (5-HT5a) receptor	HTR5A	P47898
LTM-TCM	Laurotetanine	267400	GVVXPMORGFYVOO-UHFFFAOYSA-N	128-76-7	55.41	0.51	Serotonin 2a (5-HT2a) receptor	HTR2A	P28223
LTM-TCM	Laurotetanine	267400	GVVXPMORGFYVOO-UHFFFAOYSA-N	128-76-7	55.41	0.51	Serotonin transporter	SLC6A4	P31645
LTM-TCM	Laurotetanine	267400	GVVXPMORGFYVOO-UHFFFAOYSA-N	128-76-7	55.41	0.51	Dopamine transporter (by homology)	SLC6A3	Q01959
LTM-TCM	Laurotetanine	267400	GVVXPMORGFYVOO-UHFFFAOYSA-N	128-76-7	55.41	0.51	Serotonin 1d (5-HT1d) receptor	HTR1D	P28221
LTM-TCM	Laurotetanine	267400	GVVXPMORGFYVOO-UHFFFAOYSA-N	128-76-7	55.41	0.51	Mu opioid receptor	OPRM1	P35372
LTM-TCM	Laurotetanine	267400	GVVXPMORGFYVOO-UHFFFAOYSA-N	128-76-7	55.41	0.51	Dopamine D3 receptor	DRD3	P35462
LTM-TCM	Laurotetanine	267400	GVVXPMORGFYVOO-UHFFFAOYSA-N	128-76-7	55.41	0.51	Serotonin 1b (5-HT1b) receptor	HTR1B	P28222
LTM-TCM	Laurotetanine	267400	GVVXPMORGFYVOO-UHFFFAOYSA-N	128-76-7	55.41	0.51	Dopamine D4 receptor	DRD4	P21917
LTM-TCM	Laurotetanine	267400	GVVXPMORGFYVOO-UHFFFAOYSA-N	128-76-7	55.41	0.51	Serotonin 2c (5-HT2c) receptor	HTR2C	P28335
LTM-TCM	Laurotetanine	267400	GVVXPMORGFYVOO-UHFFFAOYSA-N	128-76-7	55.41	0.51	Dopamine D5 receptor	DRD5	P21918
LTM-TCM	Laurotetanine	267400	GVVXPMORGFYVOO-UHFFFAOYSA-N	128-76-7	55.41	0.51	Beta-1 adrenergic receptor	ADRB1	P08588
LTM-TCM	Laurotetanine	267400	GVVXPMORGFYVOO-UHFFFAOYSA-N	128-76-7	55.41	0.51	Protein tyrosine phosphatase receptor type C-associated protein	PTPRCAP	Q14761
LTM-TCM	Laurotetanine	267400	GVVXPMORGFYVOO-UHFFFAOYSA-N	128-76-7	55.41	0.51	Alpha-2a adrenergic receptor	ADRA2A	P08913
LTM-TCM	Laurotetanine	267400	GVVXPMORGFYVOO-UHFFFAOYSA-N	128-76-7	55.41	0.51	Adrenergic receptor alpha-2	ADRA2C	P18825
LTM-TCM	Laurotetanine	267400	GVVXPMORGFYVOO-UHFFFAOYSA-N	128-76-7	55.41	0.51	Alpha-2b adrenergic receptor	ADRA2B	P18089
LTM-TCM	Laurotetanine	267400	GVVXPMORGFYVOO-UHFFFAOYSA-N	128-76-7	55.41	0.51	Histamine H2 receptor	HRH2	P25021
LTM-TCM	Laurotetanine	267400	GVVXPMORGFYVOO-UHFFFAOYSA-N	128-76-7	55.41	0.51	HERG	KCNH2	Q12809
LTM-TCM	Laurotetanine	267400	GVVXPMORGFYVOO-UHFFFAOYSA-N	128-76-7	55.41	0.51	Alpha-1d adrenergic receptor	ADRA1D	P25100
LTM-TCM	Laurotetanine	267400	GVVXPMORGFYVOO-UHFFFAOYSA-N	128-76-7	55.41	0.51	Alpha-1b adrenergic receptor	ADRA1B	P35368
LTM-TCM	Laurotetanine	267400	GVVXPMORGFYVOO-UHFFFAOYSA-N	128-76-7	55.41	0.51	Translocator protein	TSPO	P30536
LTM-TCM	Laurotetanine	267400	GVVXPMORGFYVOO-UHFFFAOYSA-N	128-76-7	55.41	0.51	Tyrosine 3-hydroxylase	TH	P07101
LTM-TCM	Laurotetanine	267400	GVVXPMORGFYVOO-UHFFFAOYSA-N	128-76-7	55.41	0.51	Rho-associated protein kinase 2	ROCK2	O75116
LTM-TCM	Laurotetanine	267400	GVVXPMORGFYVOO-UHFFFAOYSA-N	128-76-7	55.41	0.51	Sigma opioid receptor	SIGMAR1	Q99720
LTM-TCM	Laurotetanine	267400	GVVXPMORGFYVOO-UHFFFAOYSA-N	128-76-7	55.41	0.51	Cyclin-dependent kinase 2/cyclin E1	CCNE1 CDK2	P24864 P24941
LTM-TCM	Laurotetanine	267400	GVVXPMORGFYVOO-UHFFFAOYSA-N	128-76-7	55.41	0.51	Inhibitor of nuclear factor kappa B kinase beta subunit	IKBKB	O14920
LTM-TCM	Laurotetanine	267400	GVVXPMORGFYVOO-UHFFFAOYSA-N	128-76-7	55.41	0.51	Protein kinase C delta	PRKCD	Q05655
LTM-TCM	Laurotetanine	267400	GVVXPMORGFYVOO-UHFFFAOYSA-N	128-76-7	55.41	0.51	Protein kinase C alpha	PRKCA	P17252
LTM-TCM	Laurotetanine	267400	GVVXPMORGFYVOO-UHFFFAOYSA-N	128-76-7	55.41	0.51	Protein kinase N2	PKN2	Q16513
LTM-TCM	Laurotetanine	267400	GVVXPMORGFYVOO-UHFFFAOYSA-N	128-76-7	55.41	0.51	Protein kinase C beta	PRKCB	P05771
LTM-TCM	Laurotetanine	267400	GVVXPMORGFYVOO-UHFFFAOYSA-N	128-76-7	55.41	0.51	Rho-associated protein kinase 1	ROCK1	Q13464
LTM-TCM	Laurotetanine	267400	GVVXPMORGFYVOO-UHFFFAOYSA-N	128-76-7	55.41	0.51	Protein kinase N1	PKN1	Q16512
LTM-TCM	Laurotetanine	267400	GVVXPMORGFYVOO-UHFFFAOYSA-N	128-76-7	55.41	0.51	Protein kinase C epsilon	PRKCE	Q02156
LTM-TCM	Laurotetanine	267400	GVVXPMORGFYVOO-UHFFFAOYSA-N	128-76-7	55.41	0.51	Protein kinase C eta	PRKCH	P24723
LTM-TCM	Laurotetanine	267400	GVVXPMORGFYVOO-UHFFFAOYSA-N	128-76-7	55.41	0.51	Protein kinase C theta	PRKCQ	Q04759
LTM-TCM	Laurotetanine	267400	GVVXPMORGFYVOO-UHFFFAOYSA-N	128-76-7	55.41	0.51	Maternal embryonic leucine zipper kinase	MELK	Q14680
LTM-TCM	Laurotetanine	267400	GVVXPMORGFYVOO-UHFFFAOYSA-N	128-76-7	55.41	0.51	Serotonin 3a (5-HT3a) receptor	HTR3A	P46098
LTM-TCM	Laurotetanine	267400	GVVXPMORGFYVOO-UHFFFAOYSA-N	128-76-7	55.41	0.51	Serine/threonine-protein kinase PIM1	PIM1	P11309
LTM-TCM	Laurotetanine	267400	GVVXPMORGFYVOO-UHFFFAOYSA-N	128-76-7	55.41	0.51	Serine/threonine-protein kinase PIM2	PIM2	Q9P1W9
LTM-TCM	Laurotetanine	267400	GVVXPMORGFYVOO-UHFFFAOYSA-N	128-76-7	55.41	0.51	Epidermal growth factor receptor erbB1	EGFR	P00533
LTM-TCM	Laurotetanine	267400	GVVXPMORGFYVOO-UHFFFAOYSA-N	128-76-7	55.41	0.51	Cyclin-dependent kinase 2	CDK2	P24941
LTM-TCM	Laurotetanine	267400	GVVXPMORGFYVOO-UHFFFAOYSA-N	128-76-7	55.41	0.51	Cyclin-dependent kinase 1	CDK1	P06493
LTM-TCM	Laurotetanine	267400	GVVXPMORGFYVOO-UHFFFAOYSA-N	128-76-7	55.41	0.51	Inhibitor of NF-kappa-B kinase (IKK)	CHUK	O15111
LTM-TCM	Laurotetanine	267400	GVVXPMORGFYVOO-UHFFFAOYSA-N	128-76-7	55.41	0.51	Protein arginine N-methyltransferase 6	PRMT6	Q96LA8
LTM-TCM	Laurotetanine	267400	GVVXPMORGFYVOO-UHFFFAOYSA-N	128-76-7	55.41	0.51	Protein arginine N-methyltransferase 8	PRMT8	Q9NR22
LTM-TCM	Laurotetanine	267400	GVVXPMORGFYVOO-UHFFFAOYSA-N	128-76-7	55.41	0.51	Phosphodiesterase 10A	PDE10A	Q9Y233
LTM-TCM	Laurotetanine	267400	GVVXPMORGFYVOO-UHFFFAOYSA-N	128-76-7	55.41	0.51	Protein-arginine N-methyltransferase 1	PRMT1	Q99873
LTM-TCM	Laurotetanine	267400	GVVXPMORGFYVOO-UHFFFAOYSA-N	128-76-7	55.41	0.51	Cyclin-dependent kinase 2/cyclin E	CCNE2 CDK2 CCNE1	O96020 P24941 P24864
LTM-TCM	Laurotetanine	267400	GVVXPMORGFYVOO-UHFFFAOYSA-N	128-76-7	55.41	0.51	P2X purinoceptor 4	P2RX4	Q99571
LTM-TCM	Laurotetanine	267400	GVVXPMORGFYVOO-UHFFFAOYSA-N	128-76-7	55.41	0.51	Muscarinic acetylcholine receptor M2	CHRM2	P08172
LTM-TCM	Laurotetanine	267400	GVVXPMORGFYVOO-UHFFFAOYSA-N	128-76-7	55.41	0.51	Muscarinic acetylcholine receptor M1	CHRM1	P11229
LTM-TCM	Laurotetanine	267400	GVVXPMORGFYVOO-UHFFFAOYSA-N	128-76-7	55.41	0.51	Muscarinic acetylcholine receptor M3	CHRM3	P20309
LTM-TCM	Laurotetanine	267400	GVVXPMORGFYVOO-UHFFFAOYSA-N	128-76-7	55.41	0.51	Neurokinin 1 receptor	TACR1	P25103
LTM-TCM	Laurotetanine	267400	GVVXPMORGFYVOO-UHFFFAOYSA-N	128-76-7	55.41	0.51	Cytochrome P450 2D6	CYP2D6	P10635
LTM-TCM	Laurotetanine	267400	GVVXPMORGFYVOO-UHFFFAOYSA-N	128-76-7	55.41	0.51	Glycogen synthase kinase-3 beta	GSK3B	P49841
LTM-TCM	Laurotetanine	267400	GVVXPMORGFYVOO-UHFFFAOYSA-N	128-76-7	55.41	0.51	Protein kinase C mu	PRKD1	Q15139
LTM-TCM	Laurotetanine	267400	GVVXPMORGFYVOO-UHFFFAOYSA-N	128-76-7	55.41	0.51	Receptor protein-tyrosine kinase erbB-2	ERBB2	P04626
LTM-TCM	Laurotetanine	267400	GVVXPMORGFYVOO-UHFFFAOYSA-N	128-76-7	55.41	0.51	Acetylcholine receptor; alpha1/beta1/delta/gamma	CHRNB1 CHRNA1 CHRNG CHRND	P11230 P02708 P07510 Q07001
LTM-TCM	Laurotetanine	267400	GVVXPMORGFYVOO-UHFFFAOYSA-N	128-76-7	55.41	0.51	Neuronal acetylcholine receptor protein alpha-7 subunit	CHRNA7	P36544
LTM-TCM	Laurotetanine	267400	GVVXPMORGFYVOO-UHFFFAOYSA-N	128-76-7	55.41	0.51	Cyclooxygenase-2	PTGS2	P35354
LTM-TCM	Laurotetanine	267400	GVVXPMORGFYVOO-UHFFFAOYSA-N	128-76-7	55.41	0.51	Leukotriene A4 hydrolase	LTA4H	P09960
LTM-TCM	Laurotetanine	267400	GVVXPMORGFYVOO-UHFFFAOYSA-N	128-76-7	55.41	0.51	Dipeptidyl peptidase IX	DPP9	Q86TI2
LTM-TCM	Laurotetanine	267400	GVVXPMORGFYVOO-UHFFFAOYSA-N	128-76-7	55.41	0.51	Arachidonate 15-lipoxygenase	ALOX15	P16050
LTM-TCM	Laurotetanine	267400	GVVXPMORGFYVOO-UHFFFAOYSA-N	128-76-7	55.41	0.51	Serotonin 1f (5-HT1f) receptor	HTR1F	P30939
LTM-TCM	Laurotetanine	267400	GVVXPMORGFYVOO-UHFFFAOYSA-N	128-76-7	55.41	0.51	GABA-A receptor; alpha-1/beta-2/gamma-2	GABRA1 GABRB2 GABRG2	P14867 P47870 P18507
LTM-TCM	Laurotetanine	267400	GVVXPMORGFYVOO-UHFFFAOYSA-N	128-76-7	55.41	0.51	Cyclin-dependent kinase 9	CDK9	P50750
LTM-TCM	Laurotetanine	267400	GVVXPMORGFYVOO-UHFFFAOYSA-N	128-76-7	55.41	0.51	PDZ-binding kinase	PBK	Q96KB5
LTM-TCM	Laurotetanine	267400	GVVXPMORGFYVOO-UHFFFAOYSA-N	128-76-7	55.41	0.51	Tyrosine-protein kinase SRC	SRC	P12931
LTM-TCM	Laurotetanine	267400	GVVXPMORGFYVOO-UHFFFAOYSA-N	128-76-7	55.41	0.51	Serine/threonine-protein kinase mTOR	MTOR	P42345
LTM-TCM	Laurotetanine	267400	GVVXPMORGFYVOO-UHFFFAOYSA-N	128-76-7	55.41	0.51	PI3-kinase p110-gamma subunit	PIK3CG	P48736
LTM-TCM	Laurotetanine	267400	GVVXPMORGFYVOO-UHFFFAOYSA-N	128-76-7	55.41	0.51	PI3-kinase p110-alpha subunit	PIK3CA	P42336
LTM-TCM	Laurotetanine	267400	GVVXPMORGFYVOO-UHFFFAOYSA-N	128-76-7	55.41	0.51	Tyrosine-protein kinase SYK	SYK	P43405
LTM-TCM	Laurotetanine	267400	GVVXPMORGFYVOO-UHFFFAOYSA-N	128-76-7	55.41	0.51	Serine/threonine-protein kinase AKT	AKT1	P31749
LTM-TCM	Laurotetanine	267400	GVVXPMORGFYVOO-UHFFFAOYSA-N	128-76-7	55.41	0.51	Fibroblast activation protein alpha	FAP	Q12884
LTM-TCM	Laurotetanine	267400	GVVXPMORGFYVOO-UHFFFAOYSA-N	128-76-7	55.41	0.51	Dual specificity protein kinase TTK	TTK	P33981
LTM-TCM	Laurotetanine	267400	GVVXPMORGFYVOO-UHFFFAOYSA-N	128-76-7	55.41	0.51	Adrenergic receptor beta	ADRB2	P07550
LTM-TCM	Laurotetanine	267400	GVVXPMORGFYVOO-UHFFFAOYSA-N	128-76-7	55.41	0.51	CaM kinase II	CAMK2D	Q13557
LTM-TCM	Laurotetanine	267400	GVVXPMORGFYVOO-UHFFFAOYSA-N	128-76-7	55.41	0.51	Casein kinase II alpha	CSNK2A1	P68400
LTM-TCM	Laurotetanine	267400	GVVXPMORGFYVOO-UHFFFAOYSA-N	128-76-7	55.41	0.51	Histamine H4 receptor	HRH4	Q9H3N8
LTM-TCM	Laurotetanine	267400	GVVXPMORGFYVOO-UHFFFAOYSA-N	128-76-7	55.41	0.51	Casein kinase II alpha (prime)	CSNK2A2	P19784
LTM-TCM	Laurotetanine	267400	GVVXPMORGFYVOO-UHFFFAOYSA-N	128-76-7	55.41	0.51	Nitric oxide synthase, inducible	NOS2	P35228
LTM-TCM	Laurotetanine	267400	GVVXPMORGFYVOO-UHFFFAOYSA-N	128-76-7	55.41	0.51	Serine/threonine-protein kinase AKT2	AKT2	P31751
LTM-TCM	Laurotetanine	267400	GVVXPMORGFYVOO-UHFFFAOYSA-N	128-76-7	55.41	0.51	Serine/threonine-protein kinase AKT	AKT3	Q9Y243
LTM-TCM	Laurotetanine	267400	GVVXPMORGFYVOO-UHFFFAOYSA-N	128-76-7	55.41	0.51	PH domain leucine-rich repeat-containing protein phosphatase 2	PHLPP2	Q6ZVD8
LTM-TCM	Laurotetanine	267400	GVVXPMORGFYVOO-UHFFFAOYSA-N	128-76-7	55.41	0.51	Tyrosine-protein kinase JAK3	JAK3	P52333
LTM-TCM	Laurotetanine	267400	GVVXPMORGFYVOO-UHFFFAOYSA-N	128-76-7	55.41	0.51	Tyrosine-protein kinase JAK1	JAK1	P23458
LTM-TCM	Laurotetanine	267400	GVVXPMORGFYVOO-UHFFFAOYSA-N	128-76-7	55.41	0.51	Muscarinic acetylcholine receptor M4	CHRM4	P08173
LTM-TCM	Laurotetanine	267400	GVVXPMORGFYVOO-UHFFFAOYSA-N	128-76-7	55.41	0.51	Cyclooxygenase-1	PTGS1	P23219
LTM-TCM	Laurotetanine	267400	GVVXPMORGFYVOO-UHFFFAOYSA-N	128-76-7	55.41	0.51	Cystinyl aminopeptidase	LNPEP	Q9UIQ6
LTM-TCM	Laurotetanine	267400	GVVXPMORGFYVOO-UHFFFAOYSA-N	128-76-7	55.41	0.51	Endoplasmic reticulum aminopeptidase 2	ERAP2	Q6P179
LTM-TCM	Laurotetanine	267400	GVVXPMORGFYVOO-UHFFFAOYSA-N	128-76-7	55.41	0.51	Tyrosine-protein kinase JAK2	JAK2	O60674
LTM-TCM	Laurotetanine	267400	GVVXPMORGFYVOO-UHFFFAOYSA-N	128-76-7	55.41	0.51	Tyrosine-protein kinase TYK2	TYK2	P29597
HERB	ZINC03982454	11870467	KZJWDPNRJALLNS-ZGFRWYMBSA-N	NA	36.91	0.76	HMG-CoA reductase	HMGCR	P04035
HERB	ZINC03982454	11870467	KZJWDPNRJALLNS-ZGFRWYMBSA-N	NA	36.91	0.76	Cytochrome P450 51 (by homology)	CYP51A1	Q16850
HERB	ZINC03982454	11870467	KZJWDPNRJALLNS-ZGFRWYMBSA-N	NA	36.91	0.76	Androgen Receptor	AR	P10275
HERB	ZINC03982454	11870467	KZJWDPNRJALLNS-ZGFRWYMBSA-N	NA	36.91	0.76	Niemann-Pick C1-like protein 1	NPC1L1	Q9UHC9
HERB	ZINC03982454	11870467	KZJWDPNRJALLNS-ZGFRWYMBSA-N	NA	36.91	0.76	LXR-alpha	NR1H3	Q13133
HERB	ZINC03982454	11870467	KZJWDPNRJALLNS-ZGFRWYMBSA-N	NA	36.91	0.76	Cytochrome P450 17A1	CYP17A1	P05093
HERB	ZINC03982454	11870467	KZJWDPNRJALLNS-ZGFRWYMBSA-N	NA	36.91	0.76	Nuclear receptor ROR-gamma	RORC	P51449
HERB	ZINC03982454	11870467	KZJWDPNRJALLNS-ZGFRWYMBSA-N	NA	36.91	0.76	Cytochrome P450 19A1	CYP19A1	P11511
HERB	ZINC03982454	11870467	KZJWDPNRJALLNS-ZGFRWYMBSA-N	NA	36.91	0.76	Estrogen receptor beta	ESR2	Q92731
HERB	ZINC03982454	11870467	KZJWDPNRJALLNS-ZGFRWYMBSA-N	NA	36.91	0.76	Estrogen receptor alpha	ESR1	P03372
HERB	ZINC03982454	11870467	KZJWDPNRJALLNS-ZGFRWYMBSA-N	NA	36.91	0.76	Testis-specific androgen-binding protein	SHBG	P04278
HERB	ZINC03982454	11870467	KZJWDPNRJALLNS-ZGFRWYMBSA-N	NA	36.91	0.76	Sterol regulatory element-binding protein 2	SREBF2	Q12772
HERB	ZINC03982454	11870467	KZJWDPNRJALLNS-ZGFRWYMBSA-N	NA	36.91	0.76	Cytochrome P450 2C19	CYP2C19	P33261
HERB	ZINC03982454	11870467	KZJWDPNRJALLNS-ZGFRWYMBSA-N	NA	36.91	0.76	Norepinephrine transporter	SLC6A2	P23975
HERB	ZINC03982454	11870467	KZJWDPNRJALLNS-ZGFRWYMBSA-N	NA	36.91	0.76	Butyrylcholinesterase	BCHE	P06276
HERB	ZINC03982454	11870467	KZJWDPNRJALLNS-ZGFRWYMBSA-N	NA	36.91	0.76	Nuclear receptor ROR-alpha	RORA	P35398
HERB	ZINC03982454	11870467	KZJWDPNRJALLNS-ZGFRWYMBSA-N	NA	36.91	0.76	Protein-tyrosine phosphatase 1B	PTPN1	P18031
HERB	ZINC03982454	11870467	KZJWDPNRJALLNS-ZGFRWYMBSA-N	NA	36.91	0.76	Corticosteroid binding globulin	SERPINA6	P08185
HERB	ZINC03982454	11870467	KZJWDPNRJALLNS-ZGFRWYMBSA-N	NA	36.91	0.76	Serotonin transporter	SLC6A4	P31645
HERB	ZINC03982454	11870467	KZJWDPNRJALLNS-ZGFRWYMBSA-N	NA	36.91	0.76	Glucose-6-phosphate 1-dehydrogenase	G6PD	P11413
HERB	ZINC03982454	11870467	KZJWDPNRJALLNS-ZGFRWYMBSA-N	NA	36.91	0.76	Nuclear receptor subfamily 1 group I member 3 (by homology)	NR1I3	Q14994
HERB	ZINC03982454	11870467	KZJWDPNRJALLNS-ZGFRWYMBSA-N	NA	36.91	0.76	Muscarinic acetylcholine receptor M2	CHRM2	P08172
HERB	ZINC03982454	11870467	KZJWDPNRJALLNS-ZGFRWYMBSA-N	NA	36.91	0.76	Acetylcholinesterase	ACHE	P22303
HERB	ZINC03982454	11870467	KZJWDPNRJALLNS-ZGFRWYMBSA-N	NA	36.91	0.76	Vitamin D receptor	VDR	P11473
HERB	ZINC03982454	11870467	KZJWDPNRJALLNS-ZGFRWYMBSA-N	NA	36.91	0.76	Carboxylesterase 2	CES2	O00748
HERB	ZINC03982454	11870467	KZJWDPNRJALLNS-ZGFRWYMBSA-N	NA	36.91	0.76	LXR-beta	NR1H2	P55055
HERB	ZINC03982454	11870467	KZJWDPNRJALLNS-ZGFRWYMBSA-N	NA	36.91	0.76	Dual specificity phosphatase Cdc25A	CDC25A	P30304
HERB	ZINC03982454	11870467	KZJWDPNRJALLNS-ZGFRWYMBSA-N	NA	36.91	0.76	Prostanoid EP1 receptor (by homology)	PTGER1	P34995
HERB	ZINC03982454	11870467	KZJWDPNRJALLNS-ZGFRWYMBSA-N	NA	36.91	0.76	Prostanoid EP2 receptor (by homology)	PTGER2	P43116
HERB	ZINC03982454	11870467	KZJWDPNRJALLNS-ZGFRWYMBSA-N	NA	36.91	0.76	11-beta-hydroxysteroid dehydrogenase 1	HSD11B1	P28845
HERB	ZINC03982454	11870467	KZJWDPNRJALLNS-ZGFRWYMBSA-N	NA	36.91	0.76	Anti-estrogen binding site (AEBS) (by homology)	DHCR7	Q9UBM7
HERB	ZINC03982454	11870467	KZJWDPNRJALLNS-ZGFRWYMBSA-N	NA	36.91	0.76	Glycine receptor subunit alpha-1	GLRA1	P23415
HERB	ZINC03982454	11870467	KZJWDPNRJALLNS-ZGFRWYMBSA-N	NA	36.91	0.76	Peroxisome proliferator-activated receptor delta	PPARD	Q03181
HERB	ZINC03982454	11870467	KZJWDPNRJALLNS-ZGFRWYMBSA-N	NA	36.91	0.76	Squalene monooxygenase	SQLE	Q14534
HERB	ZINC03982454	11870467	KZJWDPNRJALLNS-ZGFRWYMBSA-N	NA	36.91	0.76	Protein-tyrosine phosphatase 1C	PTPN6	P29350
HERB	ZINC03982454	11870467	KZJWDPNRJALLNS-ZGFRWYMBSA-N	NA	36.91	0.76	Squalene synthetase (by homology)	FDFT1	P37268
HERB	ZINC03982454	11870467	KZJWDPNRJALLNS-ZGFRWYMBSA-N	NA	36.91	0.76	Nitric oxide synthase, inducible (by homology)	NOS2	P35228
HERB	ZINC03982454	11870467	KZJWDPNRJALLNS-ZGFRWYMBSA-N	NA	36.91	0.76	Glucocorticoid receptor	NR3C1	P04150
HERB	ZINC03982454	11870467	KZJWDPNRJALLNS-ZGFRWYMBSA-N	NA	36.91	0.76	Dual specificity phosphatase Cdc25B	CDC25B	P30305
HERB	ZINC03982454	11870467	KZJWDPNRJALLNS-ZGFRWYMBSA-N	NA	36.91	0.76	Sonic hedgehog protein (by homology)	SHH	Q15465
HERB	ZINC03982454	11870467	KZJWDPNRJALLNS-ZGFRWYMBSA-N	NA	36.91	0.76	UDP-glucuronosyltransferase 2B7	UGT2B7	P16662
HERB	ZINC03982454	11870467	KZJWDPNRJALLNS-ZGFRWYMBSA-N	NA	36.91	0.76	11-beta-hydroxysteroid dehydrogenase 2	HSD11B2	P80365
HERB	ZINC03982454	11870467	KZJWDPNRJALLNS-ZGFRWYMBSA-N	NA	36.91	0.76	Dopamine D2 receptor	DRD2	P14416
HERB	ZINC03982454	11870467	KZJWDPNRJALLNS-ZGFRWYMBSA-N	NA	36.91	0.76	DNA polymerase beta (by homology)	POLB	P06746
HERB	(E,E,E)-Sylvatine	131750975	URFYPQQKBYOWIX-SWZGVYIDSA-N	42438-80-2	44	0.51	Monoamine oxidase B	MAOB	P27338
HERB	(E,E,E)-Sylvatine	131750975	URFYPQQKBYOWIX-SWZGVYIDSA-N	42438-80-2	44	0.51	Acyl coenzyme A:cholesterol acyltransferase 1	SOAT1	P35610
HERB	(E,E,E)-Sylvatine	131750975	URFYPQQKBYOWIX-SWZGVYIDSA-N	42438-80-2	44	0.51	Sigma opioid receptor	SIGMAR1	Q99720
HERB	(E,E,E)-Sylvatine	131750975	URFYPQQKBYOWIX-SWZGVYIDSA-N	42438-80-2	44	0.51	Acyl coenzyme A:cholesterol acyltransferase	CES1	P23141
HERB	(E,E,E)-Sylvatine	131750975	URFYPQQKBYOWIX-SWZGVYIDSA-N	42438-80-2	44	0.51	Sn1-specific diacylglycerol lipase alpha	DAGLA	Q9Y4D2
HERB	(E,E,E)-Sylvatine	131750975	URFYPQQKBYOWIX-SWZGVYIDSA-N	42438-80-2	44	0.51	Tyrosine-protein kinase ITK/TSK	ITK	Q08881
HERB	(E,E,E)-Sylvatine	131750975	URFYPQQKBYOWIX-SWZGVYIDSA-N	42438-80-2	44	0.51	Rho-associated protein kinase 2	ROCK2	O75116
HERB	(E,E,E)-Sylvatine	131750975	URFYPQQKBYOWIX-SWZGVYIDSA-N	42438-80-2	44	0.51	Phospholipase A2 group IIA	PLA2G2A	P14555
HERB	(E,E,E)-Sylvatine	131750975	URFYPQQKBYOWIX-SWZGVYIDSA-N	42438-80-2	44	0.51	Cytosolic phospholipase A2	PLA2G4A	P47712
HERB	Bisdemethoxycurcumin	5315472	PREBVFJICNPEKM-YDWXAUTNSA-N	33171-05-0	77.38	0.26	Beta-secretase 1	BACE1	P56817
HERB	Bisdemethoxycurcumin	5315472	PREBVFJICNPEKM-YDWXAUTNSA-N	33171-05-0	77.38	0.26	Monoamine oxidase A	MAOA	P21397
HERB	Bisdemethoxycurcumin	5315472	PREBVFJICNPEKM-YDWXAUTNSA-N	33171-05-0	77.38	0.26	Beta amyloid A4 protein	APP	P05067
HERB	Bisdemethoxycurcumin	5315472	PREBVFJICNPEKM-YDWXAUTNSA-N	33171-05-0	77.38	0.26	Histone acetyltransferase p300	EP300	Q09472
HERB	Bisdemethoxycurcumin	5315472	PREBVFJICNPEKM-YDWXAUTNSA-N	33171-05-0	77.38	0.26	Prostaglandin E synthase	PTGES	O14684
HERB	Bisdemethoxycurcumin	5315472	PREBVFJICNPEKM-YDWXAUTNSA-N	33171-05-0	77.38	0.26	Toll-like receptor (TLR7/TLR9)	TLR9	Q9NR96
HERB	Bisdemethoxycurcumin	5315472	PREBVFJICNPEKM-YDWXAUTNSA-N	33171-05-0	77.38	0.26	Coagulation factor VII/tissue factor	F3	P13726
HERB	Bisdemethoxycurcumin	5315472	PREBVFJICNPEKM-YDWXAUTNSA-N	33171-05-0	77.38	0.26	11-beta-hydroxysteroid dehydrogenase 1	HSD11B1	P28845
HERB	Bisdemethoxycurcumin	5315472	PREBVFJICNPEKM-YDWXAUTNSA-N	33171-05-0	77.38	0.26	DNA topoisomerase II alpha	TOP2A	P11388
HERB	Bisdemethoxycurcumin	5315472	PREBVFJICNPEKM-YDWXAUTNSA-N	33171-05-0	77.38	0.26	Tyrosine-protein kinase SRC	SRC	P12931
HERB	Bisdemethoxycurcumin	5315472	PREBVFJICNPEKM-YDWXAUTNSA-N	33171-05-0	77.38	0.26	Glyoxalase I	GLO1	Q04760
HERB	Bisdemethoxycurcumin	5315472	PREBVFJICNPEKM-YDWXAUTNSA-N	33171-05-0	77.38	0.26	Inhibitor of NF-kappa-B kinase (IKK)	IKBKG IKBKB CHUK	Q9Y6K9 O14920 O15111
HERB	Bisdemethoxycurcumin	5315472	PREBVFJICNPEKM-YDWXAUTNSA-N	33171-05-0	77.38	0.26	Phospholipase C-gamma-1	PLCG1	P19174
HERB	Bisdemethoxycurcumin	5315472	PREBVFJICNPEKM-YDWXAUTNSA-N	33171-05-0	77.38	0.26	Serine/threonine-protein kinase EEF2K	EEF2K	O00418
HERB	Bisdemethoxycurcumin	5315472	PREBVFJICNPEKM-YDWXAUTNSA-N	33171-05-0	77.38	0.26	Arachidonate 5-lipoxygenase	ALOX5	P09917
HERB	Bisdemethoxycurcumin	5315472	PREBVFJICNPEKM-YDWXAUTNSA-N	33171-05-0	77.38	0.26	Cyclin-dependent kinase 5/CDK5 activator 1	CDK5R1 CDK5	Q15078 Q00535
HERB	Bisdemethoxycurcumin	5315472	PREBVFJICNPEKM-YDWXAUTNSA-N	33171-05-0	77.38	0.26	Estradiol 17-beta-dehydrogenase 2	HSD17B2	P37059
HERB	Bisdemethoxycurcumin	5315472	PREBVFJICNPEKM-YDWXAUTNSA-N	33171-05-0	77.38	0.26	Estradiol 17-beta-dehydrogenase 1	HSD17B1	P14061
HERB	Bisdemethoxycurcumin	5315472	PREBVFJICNPEKM-YDWXAUTNSA-N	33171-05-0	77.38	0.26	Cyclin-dependent kinase 1	CDK1	P06493
HERB	Bisdemethoxycurcumin	5315472	PREBVFJICNPEKM-YDWXAUTNSA-N	33171-05-0	77.38	0.26	Serine/threonine-protein kinase Aurora-A	AURKA	O14965
HERB	Bisdemethoxycurcumin	5315472	PREBVFJICNPEKM-YDWXAUTNSA-N	33171-05-0	77.38	0.26	Serine/threonine-protein kinase mTOR	MTOR	P42345
HERB	Bisdemethoxycurcumin	5315472	PREBVFJICNPEKM-YDWXAUTNSA-N	33171-05-0	77.38	0.26	Plasminogen activator inhibitor-1	SERPINE1	P05121
HERB	Bisdemethoxycurcumin	5315472	PREBVFJICNPEKM-YDWXAUTNSA-N	33171-05-0	77.38	0.26	Glycogen synthase kinase-3 beta	GSK3B	P49841
HERB	Bisdemethoxycurcumin	5315472	PREBVFJICNPEKM-YDWXAUTNSA-N	33171-05-0	77.38	0.26	Epidermal growth factor receptor erbB1	EGFR	P00533
HERB	Bisdemethoxycurcumin	5315472	PREBVFJICNPEKM-YDWXAUTNSA-N	33171-05-0	77.38	0.26	Matrix metalloproteinase 13	MMP13	P45452
HERB	Bisdemethoxycurcumin	5315472	PREBVFJICNPEKM-YDWXAUTNSA-N	33171-05-0	77.38	0.26	Cathepsin L	CTSL	P07711
HERB	Bisdemethoxycurcumin	5315472	PREBVFJICNPEKM-YDWXAUTNSA-N	33171-05-0	77.38	0.26	Matrix metalloproteinase 8	MMP8	P22894
HERB	Bisdemethoxycurcumin	5315472	PREBVFJICNPEKM-YDWXAUTNSA-N	33171-05-0	77.38	0.26	Carbonic anhydrase VII	CA7	P43166
HERB	Bisdemethoxycurcumin	5315472	PREBVFJICNPEKM-YDWXAUTNSA-N	33171-05-0	77.38	0.26	Carbonic anhydrase I	CA1	P00915
HERB	Bisdemethoxycurcumin	5315472	PREBVFJICNPEKM-YDWXAUTNSA-N	33171-05-0	77.38	0.26	Carbonic anhydrase VI	CA6	P23280
HERB	Bisdemethoxycurcumin	5315472	PREBVFJICNPEKM-YDWXAUTNSA-N	33171-05-0	77.38	0.26	Carbonic anhydrase XIV	CA14	Q9ULX7
HERB	Bisdemethoxycurcumin	5315472	PREBVFJICNPEKM-YDWXAUTNSA-N	33171-05-0	77.38	0.26	Carbonic anhydrase IX	CA9	Q16790
HERB	Bisdemethoxycurcumin	5315472	PREBVFJICNPEKM-YDWXAUTNSA-N	33171-05-0	77.38	0.26	Carbonic anhydrase IV	CA4	P22748
HERB	Bisdemethoxycurcumin	5315472	PREBVFJICNPEKM-YDWXAUTNSA-N	33171-05-0	77.38	0.26	Carbonic anhydrase VB	CA5B	Q9Y2D0
HERB	Bisdemethoxycurcumin	5315472	PREBVFJICNPEKM-YDWXAUTNSA-N	33171-05-0	77.38	0.26	Carbonic anhydrase VA	CA5A	P35218
HERB	Bisdemethoxycurcumin	5315472	PREBVFJICNPEKM-YDWXAUTNSA-N	33171-05-0	77.38	0.26	Bone morphogenetic protein 1	BMP1	P13497
HERB	Bisdemethoxycurcumin	5315472	PREBVFJICNPEKM-YDWXAUTNSA-N	33171-05-0	77.38	0.26	Nuclear factor erythroid 2-related factor 2	NFE2L2	Q16236
HERB	Bisdemethoxycurcumin	5315472	PREBVFJICNPEKM-YDWXAUTNSA-N	33171-05-0	77.38	0.26	Cyclooxygenase-1	PTGS1	P23219
HERB	Bisdemethoxycurcumin	5315472	PREBVFJICNPEKM-YDWXAUTNSA-N	33171-05-0	77.38	0.26	Hepatocyte growth factor receptor	MET	P08581
HERB	Bisdemethoxycurcumin	5315472	PREBVFJICNPEKM-YDWXAUTNSA-N	33171-05-0	77.38	0.26	Ribosomal protein S6 kinase 1	RPS6KB1	P23443
HERB	Bisdemethoxycurcumin	5315472	PREBVFJICNPEKM-YDWXAUTNSA-N	33171-05-0	77.38	0.26	DNA topoisomerase I	TOP1	P11387
HERB	Bisdemethoxycurcumin	5315472	PREBVFJICNPEKM-YDWXAUTNSA-N	33171-05-0	77.38	0.26	Serine/threonine-protein kinase Aurora-B	AURKB	Q96GD4
HERB	Bisdemethoxycurcumin	5315472	PREBVFJICNPEKM-YDWXAUTNSA-N	33171-05-0	77.38	0.26	Serine/threonine-protein kinase RAF	RAF1	P04049
HERB	Bisdemethoxycurcumin	5315472	PREBVFJICNPEKM-YDWXAUTNSA-N	33171-05-0	77.38	0.26	Serine/threonine-protein kinase B-raf	BRAF	P15056
HERB	Bisdemethoxycurcumin	5315472	PREBVFJICNPEKM-YDWXAUTNSA-N	33171-05-0	77.38	0.26	Dynamin-1	DNM1	Q05193
HERB	Bisdemethoxycurcumin	5315472	PREBVFJICNPEKM-YDWXAUTNSA-N	33171-05-0	77.38	0.26	Tyrosine-protein kinase ABL	ABL1	P00519
HERB	Bisdemethoxycurcumin	5315472	PREBVFJICNPEKM-YDWXAUTNSA-N	33171-05-0	77.38	0.26	Platelet-derived growth factor receptor beta	PDGFRB	P09619
HERB	Bisdemethoxycurcumin	5315472	PREBVFJICNPEKM-YDWXAUTNSA-N	33171-05-0	77.38	0.26	Tyrosine-protein kinase receptor FLT3	FLT3	P36888
HERB	Bisdemethoxycurcumin	5315472	PREBVFJICNPEKM-YDWXAUTNSA-N	33171-05-0	77.38	0.26	Serine/threonine-protein kinase PIM1	PIM1	P11309
HERB	Bisdemethoxycurcumin	5315472	PREBVFJICNPEKM-YDWXAUTNSA-N	33171-05-0	77.38	0.26	Type-1 angiotensin II receptor (by homology)	AGTR1	P30556
HERB	Bisdemethoxycurcumin	5315472	PREBVFJICNPEKM-YDWXAUTNSA-N	33171-05-0	77.38	0.26	Dual specificity protein kinase CLK3 (by homology)	CLK3	P49761
HERB	Bisdemethoxycurcumin	5315472	PREBVFJICNPEKM-YDWXAUTNSA-N	33171-05-0	77.38	0.26	Serine/threonine-protein kinase Chk1	CHEK1	O14757
HERB	Bisdemethoxycurcumin	5315472	PREBVFJICNPEKM-YDWXAUTNSA-N	33171-05-0	77.38	0.26	Pyruvate dehydrogenase kinase isoform 1	PDK1	Q15118
HERB	Bisdemethoxycurcumin	5315472	PREBVFJICNPEKM-YDWXAUTNSA-N	33171-05-0	77.38	0.26	Zinc finger protein GLI2	GLI2	P10070
HERB	Bisdemethoxycurcumin	5315472	PREBVFJICNPEKM-YDWXAUTNSA-N	33171-05-0	77.38	0.26	Zinc finger protein GLI1	GLI1	P08151
HERB	Bisdemethoxycurcumin	5315472	PREBVFJICNPEKM-YDWXAUTNSA-N	33171-05-0	77.38	0.26	Serine/threonine-protein kinase WEE1	WEE1	P30291
HERB	Bisdemethoxycurcumin	5315472	PREBVFJICNPEKM-YDWXAUTNSA-N	33171-05-0	77.38	0.26	Serine/threonine-protein kinase Chk2	CHEK2	O96017
HERB	Bisdemethoxycurcumin	5315472	PREBVFJICNPEKM-YDWXAUTNSA-N	33171-05-0	77.38	0.26	Alkaline phosphatase, tissue-nonspecific isozyme	ALPL	P05186
HERB	Bisdemethoxycurcumin	5315472	PREBVFJICNPEKM-YDWXAUTNSA-N	33171-05-0	77.38	0.26	Heat shock protein HSP 90-alpha	HSP90AA1	P07900
HERB	Bisdemethoxycurcumin	5315472	PREBVFJICNPEKM-YDWXAUTNSA-N	33171-05-0	77.38	0.26	Induced myeloid leukemia cell differentiation protein Mcl-1	MCL1	Q07820
HERB	Bisdemethoxycurcumin	5315472	PREBVFJICNPEKM-YDWXAUTNSA-N	33171-05-0	77.38	0.26	Tyrosinase	TYR	P14679
HERB	Bisdemethoxycurcumin	5315472	PREBVFJICNPEKM-YDWXAUTNSA-N	33171-05-0	77.38	0.26	Multidrug resistance-associated protein 1	ABCC1	P33527
HERB	Bisdemethoxycurcumin	5315472	PREBVFJICNPEKM-YDWXAUTNSA-N	33171-05-0	77.38	0.26	Rho-associated protein kinase 2	ROCK2	O75116
HERB	Bisdemethoxycurcumin	5315472	PREBVFJICNPEKM-YDWXAUTNSA-N	33171-05-0	77.38	0.26	Dipeptidyl peptidase IV	DPP4	P27487
HERB	Bisdemethoxycurcumin	5315472	PREBVFJICNPEKM-YDWXAUTNSA-N	33171-05-0	77.38	0.26	Serine/threonine-protein kinase PLK1	PLK1	P53350
HERB	Bisdemethoxycurcumin	5315472	PREBVFJICNPEKM-YDWXAUTNSA-N	33171-05-0	77.38	0.26	Aldose reductase	AKR1B1	P15121
HERB	Bisdemethoxycurcumin	5315472	PREBVFJICNPEKM-YDWXAUTNSA-N	33171-05-0	77.38	0.26	Signal transducer and activator of transcription 6	STAT6	P42226
HERB	Bisdemethoxycurcumin	5315472	PREBVFJICNPEKM-YDWXAUTNSA-N	33171-05-0	77.38	0.26	Estrogen receptor alpha	ESR1	P03372
HERB	Hypaconitine	441737	FIDOCHXHMJHKRW-VHQVDBNASA-N	6900-87-4	31.39	0.26	Dopamine transporter (by homology)	SLC6A3	Q01959
HERB	Hypaconitine	441737	FIDOCHXHMJHKRW-VHQVDBNASA-N	6900-87-4	31.39	0.26	HERG	KCNH2	Q12809
HERB	Hypaconitine	441737	FIDOCHXHMJHKRW-VHQVDBNASA-N	6900-87-4	31.39	0.26	Serotonin transporter	SLC6A4	P31645
HERB	Hypaconitine	441737	FIDOCHXHMJHKRW-VHQVDBNASA-N	6900-87-4	31.39	0.26	Sigma opioid receptor	SIGMAR1	Q99720
HERB	Hypaconitine	441737	FIDOCHXHMJHKRW-VHQVDBNASA-N	6900-87-4	31.39	0.26	Butyrylcholinesterase	BCHE	P06276
HERB	Hypaconitine	441737	FIDOCHXHMJHKRW-VHQVDBNASA-N	6900-87-4	31.39	0.26	Muscarinic acetylcholine receptor M3 (by homology)	CHRM3	P20309
HERB	Hypaconitine	441737	FIDOCHXHMJHKRW-VHQVDBNASA-N	6900-87-4	31.39	0.26	Neuronal acetylcholine receptor protein alpha-7 subunit	CHRNA7	P36544
HERB	Hypaconitine	441737	FIDOCHXHMJHKRW-VHQVDBNASA-N	6900-87-4	31.39	0.26	Norepinephrine transporter	SLC6A2	P23975
HERB	Hypaconitine	441737	FIDOCHXHMJHKRW-VHQVDBNASA-N	6900-87-4	31.39	0.26	Muscarinic acetylcholine receptor M1	CHRM1	P11229
HERB	Hypaconitine	441737	FIDOCHXHMJHKRW-VHQVDBNASA-N	6900-87-4	31.39	0.26	Muscarinic acetylcholine receptor M2	CHRM2	P08172
HERB	Hypaconitine	441737	FIDOCHXHMJHKRW-VHQVDBNASA-N	6900-87-4	31.39	0.26	ATP-sensitive inward rectifier potassium channel 1	KCNJ1	P48048
HERB	Hypaconitine	441737	FIDOCHXHMJHKRW-VHQVDBNASA-N	6900-87-4	31.39	0.26	Beta secretase 2	BACE2	Q9Y5Z0
HERB	Hypaconitine	441737	FIDOCHXHMJHKRW-VHQVDBNASA-N	6900-87-4	31.39	0.26	Serine/threonine-protein kinase mTOR	MTOR	P42345
HERB	Hypaconitine	441737	FIDOCHXHMJHKRW-VHQVDBNASA-N	6900-87-4	31.39	0.26	PI3-kinase p110-alpha subunit	PIK3CA	P42336
HERB	Hypaconitine	441737	FIDOCHXHMJHKRW-VHQVDBNASA-N	6900-87-4	31.39	0.26	Adenosine A3 receptor	ADORA3	P0DMS8
HERB	Hypaconitine	441737	FIDOCHXHMJHKRW-VHQVDBNASA-N	6900-87-4	31.39	0.26	PI3-kinase p110-delta subunit	PIK3CD	O00329
HERB	Hypaconitine	441737	FIDOCHXHMJHKRW-VHQVDBNASA-N	6900-87-4	31.39	0.26	PI3-kinase p110-beta subunit	PIK3CB	P42338
HERB	Hypaconitine	441737	FIDOCHXHMJHKRW-VHQVDBNASA-N	6900-87-4	31.39	0.26	PI3-kinase p110-gamma subunit	PIK3CG	P48736
HERB	Hypaconitine	441737	FIDOCHXHMJHKRW-VHQVDBNASA-N	6900-87-4	31.39	0.26	C-C chemokine receptor type 3	CCR3	P51677
HERB	Hypaconitine	441737	FIDOCHXHMJHKRW-VHQVDBNASA-N	6900-87-4	31.39	0.26	Serotonin 3a (5-HT3a) receptor	HTR3A	P46098
HERB	Hypaconitine	441737	FIDOCHXHMJHKRW-VHQVDBNASA-N	6900-87-4	31.39	0.26	Brain adenylate cyclase 1	ADCY1	Q08828
HERB	Hypaconitine	441737	FIDOCHXHMJHKRW-VHQVDBNASA-N	6900-87-4	31.39	0.26	Beta-glucocerebrosidase	GBA	P04062
HERB	Hypaconitine	441737	FIDOCHXHMJHKRW-VHQVDBNASA-N	6900-87-4	31.39	0.26	Serotonin 2a (5-HT2a) receptor	HTR2A	P28223
HERB	Hypaconitine	441737	FIDOCHXHMJHKRW-VHQVDBNASA-N	6900-87-4	31.39	0.26	Leucine-rich repeat serine/threonine-protein kinase 2	LRRK2	Q5S007
HERB	Hypaconitine	441737	FIDOCHXHMJHKRW-VHQVDBNASA-N	6900-87-4	31.39	0.26	Oligosaccharyl transferase 48 kDa subunit	DDOST	P39656
HERB	Hypaconitine	441737	FIDOCHXHMJHKRW-VHQVDBNASA-N	6900-87-4	31.39	0.26	Phosphodiesterase 9A	PDE9A	O76083
HERB	Hypaconitine	441737	FIDOCHXHMJHKRW-VHQVDBNASA-N	6900-87-4	31.39	0.26	Phosphodiesterase 1C	PDE1C	Q14123
HERB	Hypaconitine	441737	FIDOCHXHMJHKRW-VHQVDBNASA-N	6900-87-4	31.39	0.26	Muscarinic acetylcholine receptor M4	CHRM4	P08173
HERB	Hypaconitine	441737	FIDOCHXHMJHKRW-VHQVDBNASA-N	6900-87-4	31.39	0.26	Phosphodiesterase 4B	PDE4B	Q07343
HERB	Hypaconitine	441737	FIDOCHXHMJHKRW-VHQVDBNASA-N	6900-87-4	31.39	0.26	Ceramide glucosyltransferase	UGCG	Q16739
HERB	Hypaconitine	441737	FIDOCHXHMJHKRW-VHQVDBNASA-N	6900-87-4	31.39	0.26	Beta-glucosidase	GBA2	Q9HCG7
HERB	Hypaconitine	441737	FIDOCHXHMJHKRW-VHQVDBNASA-N	6900-87-4	31.39	0.26	Quinone reductase 1	NQO1	P15559
HERB	Hypaconitine	441737	FIDOCHXHMJHKRW-VHQVDBNASA-N	6900-87-4	31.39	0.26	Phosphodiesterase 8B	PDE8B	O95263
HERB	Hypaconitine	441737	FIDOCHXHMJHKRW-VHQVDBNASA-N	6900-87-4	31.39	0.26	NADPH oxidase 4	NOX4	Q9NPH5
HERB	Hypaconitine	441737	FIDOCHXHMJHKRW-VHQVDBNASA-N	6900-87-4	31.39	0.26	Tyrosine-protein kinase receptor FLT3	FLT3	P36888
HERB	Hypaconitine	441737	FIDOCHXHMJHKRW-VHQVDBNASA-N	6900-87-4	31.39	0.26	Baculoviral IAP repeat-containing protein 2	BIRC2	Q13490
HERB	Ignavine	101603143	FOIZZXKAYVIZQC-CLEVJFLBSA-N	NA	84.08	0.25	Dopamine transporter (by homology)	SLC6A3	Q01959
HERB	Ignavine	101603143	FOIZZXKAYVIZQC-CLEVJFLBSA-N	NA	84.08	0.25	Muscarinic acetylcholine receptor M3	CHRM3	P20309
HERB	Ignavine	101603143	FOIZZXKAYVIZQC-CLEVJFLBSA-N	NA	84.08	0.25	ATP-sensitive inward rectifier potassium channel 1	KCNJ1	P48048
HERB	Ignavine	101603143	FOIZZXKAYVIZQC-CLEVJFLBSA-N	NA	84.08	0.25	Phosphodiesterase 11A	PDE11A	Q9HCR9
HERB	Ignavine	101603143	FOIZZXKAYVIZQC-CLEVJFLBSA-N	NA	84.08	0.25	Phosphodiesterase 10A	PDE10A	Q9Y233
HERB	Ignavine	101603143	FOIZZXKAYVIZQC-CLEVJFLBSA-N	NA	84.08	0.25	Serotonin transporter	SLC6A4	P31645
HERB	Ignavine	101603143	FOIZZXKAYVIZQC-CLEVJFLBSA-N	NA	84.08	0.25	Sigma opioid receptor	SIGMAR1	Q99720
HERB	Ignavine	101603143	FOIZZXKAYVIZQC-CLEVJFLBSA-N	NA	84.08	0.25	Phosphodiesterase 5A	PDE5A	O76074
HERB	Ignavine	101603143	FOIZZXKAYVIZQC-CLEVJFLBSA-N	NA	84.08	0.25	P2X purinoceptor 7	P2RX7	Q99572
HERB	Ignavine	101603143	FOIZZXKAYVIZQC-CLEVJFLBSA-N	NA	84.08	0.25	Leucine-rich repeat serine/threonine-protein kinase 2	LRRK2	Q5S007
HERB	Ignavine	101603143	FOIZZXKAYVIZQC-CLEVJFLBSA-N	NA	84.08	0.25	Muscarinic acetylcholine receptor M2	CHRM2	P08172
HERB	Ignavine	101603143	FOIZZXKAYVIZQC-CLEVJFLBSA-N	NA	84.08	0.25	Muscarinic acetylcholine receptor M1	CHRM1	P11229
HERB	Ignavine	101603143	FOIZZXKAYVIZQC-CLEVJFLBSA-N	NA	84.08	0.25	Telomerase reverse transcriptase	TERT	O14746
HERB	Ignavine	101603143	FOIZZXKAYVIZQC-CLEVJFLBSA-N	NA	84.08	0.25	Protein kinase C theta	PRKCQ	Q04759
HERB	Ignavine	101603143	FOIZZXKAYVIZQC-CLEVJFLBSA-N	NA	84.08	0.25	HERG	KCNH2	Q12809
HERB	Ignavine	101603143	FOIZZXKAYVIZQC-CLEVJFLBSA-N	NA	84.08	0.25	Baculoviral IAP repeat-containing protein 2	BIRC2	Q13490
HERB	Ignavine	101603143	FOIZZXKAYVIZQC-CLEVJFLBSA-N	NA	84.08	0.25	Lysosomal Pro-X carboxypeptidase	PRCP	P42785
HERB	Ignavine	101603143	FOIZZXKAYVIZQC-CLEVJFLBSA-N	NA	84.08	0.25	Multidrug and toxin extrusion protein 1	SLC47A1	Q96FL8
HERB	Ignavine	101603143	FOIZZXKAYVIZQC-CLEVJFLBSA-N	NA	84.08	0.25	Multidrug and toxin extrusion protein 2	SLC47A2	Q86VL8
HERB	Ignavine	101603143	FOIZZXKAYVIZQC-CLEVJFLBSA-N	NA	84.08	0.25	PI3-kinase p110-alpha subunit	PIK3CA	P42336
HERB	Ignavine	101603143	FOIZZXKAYVIZQC-CLEVJFLBSA-N	NA	84.08	0.25	Bromodomain-containing protein 4	BRD4	O60885
HERB	Ignavine	101603143	FOIZZXKAYVIZQC-CLEVJFLBSA-N	NA	84.08	0.25	ATPase family AAA domain-containing protein 2	ATAD2	Q6PL18
HERB	Ignavine	101603143	FOIZZXKAYVIZQC-CLEVJFLBSA-N	NA	84.08	0.25	Tyrosine-protein kinase receptor FLT3	FLT3	P36888
HERB	Ignavine	101603143	FOIZZXKAYVIZQC-CLEVJFLBSA-N	NA	84.08	0.25	C-C chemokine receptor type 3	CCR3	P51677
HERB	Ignavine	101603143	FOIZZXKAYVIZQC-CLEVJFLBSA-N	NA	84.08	0.25	Purine nucleoside phosphorylase	PNP	P00491
HERB	Ignavine	101603143	FOIZZXKAYVIZQC-CLEVJFLBSA-N	NA	84.08	0.25	Neuronal acetylcholine receptor protein alpha-7 subunit	CHRNA7	P36544
HERB	Ignavine	101603143	FOIZZXKAYVIZQC-CLEVJFLBSA-N	NA	84.08	0.25	Phosphodiesterase 4B	PDE4B	Q07343
HERB	Ignavine	101603143	FOIZZXKAYVIZQC-CLEVJFLBSA-N	NA	84.08	0.25	DNA-dependent protein kinase	PRKDC	P78527
HERB	Ignavine	101603143	FOIZZXKAYVIZQC-CLEVJFLBSA-N	NA	84.08	0.25	Dipeptidyl peptidase VIII	DPP8	Q6V1X1
HERB	Ignavine	101603143	FOIZZXKAYVIZQC-CLEVJFLBSA-N	NA	84.08	0.25	S-methyl-5-thioadenosine phosphorylase	MTAP	Q13126
HERB	Ignavine	101603143	FOIZZXKAYVIZQC-CLEVJFLBSA-N	NA	84.08	0.25	Tyrosine-protein kinase SRC	SRC	P12931
HERB	Ignavine	101603143	FOIZZXKAYVIZQC-CLEVJFLBSA-N	NA	84.08	0.25	Phosphodiesterase 8B	PDE8B	O95263
HERB	Ignavine	101603143	FOIZZXKAYVIZQC-CLEVJFLBSA-N	NA	84.08	0.25	Protein arginine N-methyltransferase 6	PRMT6	Q96LA8
HERB	Ignavine	101603143	FOIZZXKAYVIZQC-CLEVJFLBSA-N	NA	84.08	0.25	Protein arginine N-methyltransferase 8	PRMT8	Q9NR22
HERB	Ignavine	101603143	FOIZZXKAYVIZQC-CLEVJFLBSA-N	NA	84.08	0.25	Protein-arginine N-methyltransferase 1	PRMT1	Q99873
HERB	Ignavine	101603143	FOIZZXKAYVIZQC-CLEVJFLBSA-N	NA	84.08	0.25	Norepinephrine transporter	SLC6A2	P23975
HERB	Ignavine	101603143	FOIZZXKAYVIZQC-CLEVJFLBSA-N	NA	84.08	0.25	DNA topoisomerase II alpha	TOP2A	P11388
HERB	Ignavine	101603143	FOIZZXKAYVIZQC-CLEVJFLBSA-N	NA	84.08	0.25	Voltage-gated potassium channel subunit Kv1.5	KCNA5	P22460
HERB	Ignavine	101603143	FOIZZXKAYVIZQC-CLEVJFLBSA-N	NA	84.08	0.25	Serine/threonine-protein kinase PIM1	PIM1	P11309
HERB	Ignavine	101603143	FOIZZXKAYVIZQC-CLEVJFLBSA-N	NA	84.08	0.25	Serine/threonine-protein kinase PIM2	PIM2	Q9P1W9
HERB	Ignavine	101603143	FOIZZXKAYVIZQC-CLEVJFLBSA-N	NA	84.08	0.25	Serine/threonine-protein kinase PIM3	PIM3	Q86V86
HERB	Ignavine	101603143	FOIZZXKAYVIZQC-CLEVJFLBSA-N	NA	84.08	0.25	Rho-associated protein kinase 2	ROCK2	O75116
HERB	Ignavine	101603143	FOIZZXKAYVIZQC-CLEVJFLBSA-N	NA	84.08	0.25	Urotensin II receptor	UTS2R	Q9UKP6
HERB	Ignavine	101603143	FOIZZXKAYVIZQC-CLEVJFLBSA-N	NA	84.08	0.25	Neuropeptide Y receptor type 1	NPY1R	P25929
HERB	Ignavine	101603143	FOIZZXKAYVIZQC-CLEVJFLBSA-N	NA	84.08	0.25	MAP kinase p38 alpha	MAPK14	Q16539
HERB	Ignavine	101603143	FOIZZXKAYVIZQC-CLEVJFLBSA-N	NA	84.08	0.25	Phosphodiesterase 9A	PDE9A	O76083
HERB	Ignavine	101603143	FOIZZXKAYVIZQC-CLEVJFLBSA-N	NA	84.08	0.25	MAP kinase p38 beta	MAPK11	Q15759
HERB	Ignavine	101603143	FOIZZXKAYVIZQC-CLEVJFLBSA-N	NA	84.08	0.25	Phosphodiesterase 1C	PDE1C	Q14123
HERB	Ignavine	101603143	FOIZZXKAYVIZQC-CLEVJFLBSA-N	NA	84.08	0.25	Butyrylcholinesterase	BCHE	P06276
HERB	Ignavine	101603143	FOIZZXKAYVIZQC-CLEVJFLBSA-N	NA	84.08	0.25	Heat shock protein HSP 90-beta	HSP90AB1	P08238
HERB	Ignavine	101603143	FOIZZXKAYVIZQC-CLEVJFLBSA-N	NA	84.08	0.25	p53-binding protein Mdm-2	MDM2	Q00987
HERB	Ignavine	101603143	FOIZZXKAYVIZQC-CLEVJFLBSA-N	NA	84.08	0.25	Interleukin-1 receptor-associated kinase 4	IRAK4	Q9NWZ3
HERB	Ignavine	101603143	FOIZZXKAYVIZQC-CLEVJFLBSA-N	NA	84.08	0.25	c-Jun N-terminal kinase 2	MAPK9	P45984
HERB	Ignavine	101603143	FOIZZXKAYVIZQC-CLEVJFLBSA-N	NA	84.08	0.25	Sphingosine kinase 2	SPHK2	Q9NRA0
HERB	Ignavine	101603143	FOIZZXKAYVIZQC-CLEVJFLBSA-N	NA	84.08	0.25	Sphingosine kinase 1	SPHK1	Q9NYA1
HERB	Ignavine	101603143	FOIZZXKAYVIZQC-CLEVJFLBSA-N	NA	84.08	0.25	Mitogen-activated protein kinase kinase kinase 12	MAP3K12	Q12852
HERB	Ignavine	101603143	FOIZZXKAYVIZQC-CLEVJFLBSA-N	NA	84.08	0.25	Potassium channel subfamily K member 3	KCNK3	O14649
HERB	Ignavine	101603143	FOIZZXKAYVIZQC-CLEVJFLBSA-N	NA	84.08	0.25	Serine/threonine-protein kinase AKT	AKT1	P31749
HERB	Ignavine	101603143	FOIZZXKAYVIZQC-CLEVJFLBSA-N	NA	84.08	0.25	Carbonic anhydrase II	CA2	P00918
HERB	Ignavine	101603143	FOIZZXKAYVIZQC-CLEVJFLBSA-N	NA	84.08	0.25	Carbonic anhydrase I	CA1	P00915
HERB	Ignavine	101603143	FOIZZXKAYVIZQC-CLEVJFLBSA-N	NA	84.08	0.25	Carbonic anhydrase IX	CA9	Q16790
HERB	Ignavine	101603143	FOIZZXKAYVIZQC-CLEVJFLBSA-N	NA	84.08	0.25	Serine/threonine-protein kinase Chk2	CHEK2	O96017
HERB	Ignavine	101603143	FOIZZXKAYVIZQC-CLEVJFLBSA-N	NA	84.08	0.25	Cyclin-dependent kinase 2	CDK2	P24941
HERB	Ignavine	101603143	FOIZZXKAYVIZQC-CLEVJFLBSA-N	NA	84.08	0.25	Poly [ADP-ribose] polymerase-1	PARP1	P09874
HERB	Ignavine	101603143	FOIZZXKAYVIZQC-CLEVJFLBSA-N	NA	84.08	0.25	Serine/threonine-protein kinase Chk1	CHEK1	O14757
HERB	Ignavine	101603143	FOIZZXKAYVIZQC-CLEVJFLBSA-N	NA	84.08	0.25	Gonadotropin-releasing hormone receptor	GNRHR	P30968
HERB	Ignavine	101603143	FOIZZXKAYVIZQC-CLEVJFLBSA-N	NA	84.08	0.25	Matrix metalloproteinase 3	MMP3	P08254
HERB	Ignavine	101603143	FOIZZXKAYVIZQC-CLEVJFLBSA-N	NA	84.08	0.25	Serotonin 7 (5-HT7) receptor	HTR7	P34969
HERB	Ignavine	101603143	FOIZZXKAYVIZQC-CLEVJFLBSA-N	NA	84.08	0.25	Matrix metalloproteinase 9	MMP9	P14780
HERB	Ignavine	101603143	FOIZZXKAYVIZQC-CLEVJFLBSA-N	NA	84.08	0.25	Matrix metalloproteinase 1	MMP1	P03956
HERB	Ignavine	101603143	FOIZZXKAYVIZQC-CLEVJFLBSA-N	NA	84.08	0.25	Voltage-gated T-type calcium channel alpha-1G subunit	CACNA1G	O43497
HERB	Ignavine	101603143	FOIZZXKAYVIZQC-CLEVJFLBSA-N	NA	84.08	0.25	Methionine aminopeptidase 2	METAP2	P50579
HERB	Ignavine	101603143	FOIZZXKAYVIZQC-CLEVJFLBSA-N	NA	84.08	0.25	Neuronal acetylcholine receptor; alpha3/alpha6/beta2/beta3	CHRNB3 CHRNA6 CHRNB2 CHRNA3	Q05901 Q15825 P17787 P32297
HERB	Ignavine	101603143	FOIZZXKAYVIZQC-CLEVJFLBSA-N	NA	84.08	0.25	Serotonin 1f (5-HT1f) receptor	HTR1F	P30939
HERB	Ignavine	101603143	FOIZZXKAYVIZQC-CLEVJFLBSA-N	NA	84.08	0.25	Nitric-oxide synthase, brain	NOS1	P29475
HERB	Ignavine	101603143	FOIZZXKAYVIZQC-CLEVJFLBSA-N	NA	84.08	0.25	Tyrosine-protein kinase JAK1	JAK1	P23458
HERB	Ignavine	101603143	FOIZZXKAYVIZQC-CLEVJFLBSA-N	NA	84.08	0.25	MAP kinase-activated protein kinase 2	MAPKAPK2	P49137
HERB	Ignavine	101603143	FOIZZXKAYVIZQC-CLEVJFLBSA-N	NA	84.08	0.25	Cystinyl aminopeptidase	LNPEP	Q9UIQ6
HERB	Ignavine	101603143	FOIZZXKAYVIZQC-CLEVJFLBSA-N	NA	84.08	0.25	MAP kinase signal-integrating kinase 2	MKNK2	Q9HBH9
HERB	Ignavine	101603143	FOIZZXKAYVIZQC-CLEVJFLBSA-N	NA	84.08	0.25	MAP kinase-interacting serine/threonine-protein kinase MNK1	MKNK1	Q9BUB5
HERB	Ignavine	101603143	FOIZZXKAYVIZQC-CLEVJFLBSA-N	NA	84.08	0.25	Endoplasmic reticulum aminopeptidase 2	ERAP2	Q6P179
HERB	Ignavine	101603143	FOIZZXKAYVIZQC-CLEVJFLBSA-N	NA	84.08	0.25	Transient receptor potential cation channel subfamily V member 3	TRPV3	Q8NET8
HERB	Ignavine	101603143	FOIZZXKAYVIZQC-CLEVJFLBSA-N	NA	84.08	0.25	Tubulin--tyrosine ligase	TTL	Q8NG68
HERB	Ignavine	101603143	FOIZZXKAYVIZQC-CLEVJFLBSA-N	NA	84.08	0.25	Endoplasmic reticulum aminopeptidase 1	ERAP1	Q9NZ08
HERB	Ignavine	101603143	FOIZZXKAYVIZQC-CLEVJFLBSA-N	NA	84.08	0.25	Insulin-like growth factor I receptor	IGF1R	P08069
HERB	Ignavine	101603143	FOIZZXKAYVIZQC-CLEVJFLBSA-N	NA	84.08	0.25	Cyclin-dependent kinase 2/cyclin E	CCNE2 CDK2 CCNE1	O96020 P24941 P24864
HERB	Ignavine	101603143	FOIZZXKAYVIZQC-CLEVJFLBSA-N	NA	84.08	0.25	Cyclin-dependent kinase 9	CDK9	P50750
HERB	Ignavine	101603143	FOIZZXKAYVIZQC-CLEVJFLBSA-N	NA	84.08	0.25	Serine/threonine-protein kinase receptor R3	ACVRL1	P37023
HERB	Ignavine	101603143	FOIZZXKAYVIZQC-CLEVJFLBSA-N	NA	84.08	0.25	Dopamine D2 receptor (by homology)	DRD2	P14416
HERB	Ignavine	101603143	FOIZZXKAYVIZQC-CLEVJFLBSA-N	NA	84.08	0.25	Bromodomain adjacent to zinc finger domain protein 2B	BAZ2B	Q9UIF8
HERB	Ignavine	101603143	FOIZZXKAYVIZQC-CLEVJFLBSA-N	NA	84.08	0.25	Dual specificity protein phosphatase 3	DUSP3	P51452
HERB	Ignavine	101603143	FOIZZXKAYVIZQC-CLEVJFLBSA-N	NA	84.08	0.25	Tyrosine-protein kinase JAK2	JAK2	O60674
HERB	Ignavine	101603143	FOIZZXKAYVIZQC-CLEVJFLBSA-N	NA	84.08	0.25	Bromodomain adjacent to zinc finger domain protein 2A	BAZ2A	Q9UIF9
HERB	Ignavine	101603143	FOIZZXKAYVIZQC-CLEVJFLBSA-N	NA	84.08	0.25	Dipeptidyl peptidase II	DPP7	Q9UHL4
HERB	Ignavine	101603143	FOIZZXKAYVIZQC-CLEVJFLBSA-N	NA	84.08	0.25	Dipeptidyl peptidase IX	DPP9	Q86TI2
HERB	Ignavine	101603143	FOIZZXKAYVIZQC-CLEVJFLBSA-N	NA	84.08	0.25	Serine/threonine-protein kinase mTOR	MTOR	P42345
HERB	Ignavine	101603143	FOIZZXKAYVIZQC-CLEVJFLBSA-N	NA	84.08	0.25	Poly [ADP-ribose] polymerase 2	PARP2	Q9UGN5
HERB	Ignavine	101603143	FOIZZXKAYVIZQC-CLEVJFLBSA-N	NA	84.08	0.25	Macrophage colony stimulating factor receptor	CSF1R	P07333
HERB	Ignavine	101603143	FOIZZXKAYVIZQC-CLEVJFLBSA-N	NA	84.08	0.25	Gamma-secretase	PSEN2 PSENEN NCSTN APH1A PSEN1 APH1B	P49810 Q9NZ42 Q92542 Q96BI3 P49768 Q8WW43
HERB	Ignavine	101603143	FOIZZXKAYVIZQC-CLEVJFLBSA-N	NA	84.08	0.25	Tyrosine-protein kinase JAK3	JAK3	P52333
HERB	cis-Piplartine	643764	VABYUUZNAVQNPG-BQYQJAHWSA-N	20069-09-4	96.65	0.24	Serine/threonine-protein phosphatase	PPP5C	Q9BPW0
HERB	cis-Piplartine	643764	VABYUUZNAVQNPG-BQYQJAHWSA-N	20069-09-4	96.65	0.24	Tyrosine-protein kinase SRC	SRC	P12931
HERB	cis-Piplartine	643764	VABYUUZNAVQNPG-BQYQJAHWSA-N	20069-09-4	96.65	0.24	TGF-beta receptor type I	TGFBR1	P36897
HERB	cis-Piplartine	643764	VABYUUZNAVQNPG-BQYQJAHWSA-N	20069-09-4	96.65	0.24	Orexin receptor 2	HCRTR2	O43614
HERB	cis-Piplartine	643764	VABYUUZNAVQNPG-BQYQJAHWSA-N	20069-09-4	96.65	0.24	Phosphodiesterase 4B	PDE4B	Q07343
HERB	cis-Piplartine	643764	VABYUUZNAVQNPG-BQYQJAHWSA-N	20069-09-4	96.65	0.24	Monoamine oxidase B	MAOB	P27338
HERB	cis-Piplartine	643764	VABYUUZNAVQNPG-BQYQJAHWSA-N	20069-09-4	96.65	0.24	Tyrosine-protein kinase SYK	SYK	P43405
HERB	cis-Piplartine	643764	VABYUUZNAVQNPG-BQYQJAHWSA-N	20069-09-4	96.65	0.24	Poly [ADP-ribose] polymerase-1	PARP1	P09874
HERB	cis-Piplartine	643764	VABYUUZNAVQNPG-BQYQJAHWSA-N	20069-09-4	96.65	0.24	Phosphodiesterase 4A	PDE4A	P27815
HERB	cis-Piplartine	643764	VABYUUZNAVQNPG-BQYQJAHWSA-N	20069-09-4	96.65	0.24	Phosphodiesterase 10A	PDE10A	Q9Y233
HERB	cis-Piplartine	643764	VABYUUZNAVQNPG-BQYQJAHWSA-N	20069-09-4	96.65	0.24	Serotonin 1a (5-HT1a) receptor	HTR1A	P08908
HERB	cis-Piplartine	643764	VABYUUZNAVQNPG-BQYQJAHWSA-N	20069-09-4	96.65	0.24	Serotonin 2a (5-HT2a) receptor	HTR2A	P28223
HERB	cis-Piplartine	643764	VABYUUZNAVQNPG-BQYQJAHWSA-N	20069-09-4	96.65	0.24	Serotonin 7 (5-HT7) receptor	HTR7	P34969
HERB	cis-Piplartine	643764	VABYUUZNAVQNPG-BQYQJAHWSA-N	20069-09-4	96.65	0.24	Lysine-specific demethylase 5A	KDM5A	P29375
HERB	cis-Piplartine	643764	VABYUUZNAVQNPG-BQYQJAHWSA-N	20069-09-4	96.65	0.24	PI3-kinase p110-delta subunit	PIK3CD	O00329
HERB	cis-Piplartine	643764	VABYUUZNAVQNPG-BQYQJAHWSA-N	20069-09-4	96.65	0.24	PI3-kinase p110-beta subunit	PIK3CB	P42338
HERB	cis-Piplartine	643764	VABYUUZNAVQNPG-BQYQJAHWSA-N	20069-09-4	96.65	0.24	Urotensin II receptor	UTS2R	Q9UKP6
HERB	cis-Piplartine	643764	VABYUUZNAVQNPG-BQYQJAHWSA-N	20069-09-4	96.65	0.24	Lysine-specific demethylase 5B	KDM5B	Q9UGL1
HERB	cis-Piplartine	643764	VABYUUZNAVQNPG-BQYQJAHWSA-N	20069-09-4	96.65	0.24	Orexin receptor 1	HCRTR1	O43613
HERB	cis-Piplartine	643764	VABYUUZNAVQNPG-BQYQJAHWSA-N	20069-09-4	96.65	0.24	NADPH oxidase 4	NOX4	Q9NPH5
HERB	cis-Piplartine	643764	VABYUUZNAVQNPG-BQYQJAHWSA-N	20069-09-4	96.65	0.24	Thromboxane-A synthase	TBXAS1	P24557
HERB	cis-Piplartine	643764	VABYUUZNAVQNPG-BQYQJAHWSA-N	20069-09-4	96.65	0.24	Histone deacetylase 6	HDAC6	Q9UBN7
HERB	cis-Piplartine	643764	VABYUUZNAVQNPG-BQYQJAHWSA-N	20069-09-4	96.65	0.24	MAP kinase p38 alpha (by homology)	MAPK14	Q16539
HERB	cis-Piplartine	643764	VABYUUZNAVQNPG-BQYQJAHWSA-N	20069-09-4	96.65	0.24	MAP kinase p38 beta (by homology)	MAPK11	Q15759
HERB	cis-Piplartine	643764	VABYUUZNAVQNPG-BQYQJAHWSA-N	20069-09-4	96.65	0.24	P2X purinoceptor 7	P2RX7	Q99572
HERB	cis-Piplartine	643764	VABYUUZNAVQNPG-BQYQJAHWSA-N	20069-09-4	96.65	0.24	Cytochrome P450 11B1	CYP11B1	P15538
HERB	cis-Piplartine	643764	VABYUUZNAVQNPG-BQYQJAHWSA-N	20069-09-4	96.65	0.24	Phosphodiesterase 2A	PDE2A	O00408
HERB	cis-Piplartine	643764	VABYUUZNAVQNPG-BQYQJAHWSA-N	20069-09-4	96.65	0.24	Cytochrome P450 11B2	CYP11B2	P19099
HERB	cis-Piplartine	643764	VABYUUZNAVQNPG-BQYQJAHWSA-N	20069-09-4	96.65	0.24	Metabotropic glutamate receptor 5	GRM5	P41594
HERB	cis-Piplartine	643764	VABYUUZNAVQNPG-BQYQJAHWSA-N	20069-09-4	96.65	0.24	Leucine-rich repeat serine/threonine-protein kinase 2	LRRK2	Q5S007
HERB	cis-Piplartine	643764	VABYUUZNAVQNPG-BQYQJAHWSA-N	20069-09-4	96.65	0.24	Tyrosine-protein kinase ITK/TSK	ITK	Q08881
HERB	cis-Piplartine	643764	VABYUUZNAVQNPG-BQYQJAHWSA-N	20069-09-4	96.65	0.24	Phosphodiesterase 4D	PDE4D	Q08499
HERB	cis-Piplartine	643764	VABYUUZNAVQNPG-BQYQJAHWSA-N	20069-09-4	96.65	0.24	Dihydropteridine reductase	QDPR	P09417
HERB	cis-Piplartine	643764	VABYUUZNAVQNPG-BQYQJAHWSA-N	20069-09-4	96.65	0.24	Acetylcholinesterase	ACHE	P22303
HERB	cis-Piplartine	643764	VABYUUZNAVQNPG-BQYQJAHWSA-N	20069-09-4	96.65	0.24	DNA-dependent protein kinase	PRKDC	P78527
HERB	cis-Piplartine	643764	VABYUUZNAVQNPG-BQYQJAHWSA-N	20069-09-4	96.65	0.24	Tyrosine-protein kinase JAK3	JAK3	P52333
HERB	cis-Piplartine	643764	VABYUUZNAVQNPG-BQYQJAHWSA-N	20069-09-4	96.65	0.24	Tyrosine-protein kinase JAK2	JAK2	O60674
HERB	cis-Piplartine	643764	VABYUUZNAVQNPG-BQYQJAHWSA-N	20069-09-4	96.65	0.24	Tyrosine-protein kinase TYK2	TYK2	P29597
HERB	cis-Piplartine	643764	VABYUUZNAVQNPG-BQYQJAHWSA-N	20069-09-4	96.65	0.24	GABA-A receptor; alpha-3/beta-3/gamma-2	GABRB3 GABRA3 GABRG2	P28472 P34903 P18507
HERB	cis-Piplartine	643764	VABYUUZNAVQNPG-BQYQJAHWSA-N	20069-09-4	96.65	0.24	GABA-A receptor; alpha-1/beta-3/gamma-2	GABRB3 GABRG2 GABRA1	P28472 P18507 P14867
HERB	cis-Piplartine	643764	VABYUUZNAVQNPG-BQYQJAHWSA-N	20069-09-4	96.65	0.24	GABA-A receptor; alpha-5/beta-3/gamma-2	GABRB3 GABRG2 GABRA5	P28472 P18507 P31644
HERB	cis-Piplartine	643764	VABYUUZNAVQNPG-BQYQJAHWSA-N	20069-09-4	96.65	0.24	GABA-A receptor; alpha-2/beta-3/gamma-2	GABRA2 GABRB3 GABRG2	P47869 P28472 P18507
HERB	cis-Piplartine	643764	VABYUUZNAVQNPG-BQYQJAHWSA-N	20069-09-4	96.65	0.24	GABA-A receptor; alpha-6/beta-3/gamma-2	GABRG2 GABRB3 GABRA6	P18507 P28472 Q16445
HERB	cis-Piplartine	643764	VABYUUZNAVQNPG-BQYQJAHWSA-N	20069-09-4	96.65	0.24	GABA A receptor alpha-4/beta-3/gamma-2	GABRB3 GABRA4 GABRG2	P28472 P48169 P18507
HERB	cis-Piplartine	643764	VABYUUZNAVQNPG-BQYQJAHWSA-N	20069-09-4	96.65	0.24	Sodium channel protein type X alpha subunit (by homology)	SCN10A	Q9Y5Y9
HERB	cis-Piplartine	643764	VABYUUZNAVQNPG-BQYQJAHWSA-N	20069-09-4	96.65	0.24	Cyclooxygenase-2	PTGS2	P35354
HERB	cis-Piplartine	643764	VABYUUZNAVQNPG-BQYQJAHWSA-N	20069-09-4	96.65	0.24	Serotonin 6 (5-HT6) receptor	HTR6	P50406
HERB	cis-Piplartine	643764	VABYUUZNAVQNPG-BQYQJAHWSA-N	20069-09-4	96.65	0.24	Dual specificity protein phosphatase 3	DUSP3	P51452
HERB	cis-Piplartine	643764	VABYUUZNAVQNPG-BQYQJAHWSA-N	20069-09-4	96.65	0.24	Plasma kallikrein	KLKB1	P03952
HERB	cis-Piplartine	643764	VABYUUZNAVQNPG-BQYQJAHWSA-N	20069-09-4	96.65	0.24	Thrombin and coagulation factor X	F10	P00742
HERB	cis-Piplartine	643764	VABYUUZNAVQNPG-BQYQJAHWSA-N	20069-09-4	96.65	0.24	Histamine H4 receptor	HRH4	Q9H3N8
HERB	cis-Piplartine	643764	VABYUUZNAVQNPG-BQYQJAHWSA-N	20069-09-4	96.65	0.24	Transient receptor potential cation channel subfamily A member 1	TRPA1	O75762
HERB	cis-Piplartine	643764	VABYUUZNAVQNPG-BQYQJAHWSA-N	20069-09-4	96.65	0.24	Phosphodiesterase 4C	PDE4C	Q08493
HERB	cis-Piplartine	643764	VABYUUZNAVQNPG-BQYQJAHWSA-N	20069-09-4	96.65	0.24	Protein farnesyltransferase	FNTA FNTB	P49354 P49356
HERB	cis-Piplartine	643764	VABYUUZNAVQNPG-BQYQJAHWSA-N	20069-09-4	96.65	0.24	c-Jun N-terminal kinase 3	MAPK10	P53779
HERB	cis-Piplartine	643764	VABYUUZNAVQNPG-BQYQJAHWSA-N	20069-09-4	96.65	0.24	C-C chemokine receptor type 5	CCR5	P51681
HERB	cis-Piplartine	643764	VABYUUZNAVQNPG-BQYQJAHWSA-N	20069-09-4	96.65	0.24	Intercellular adhesion molecule-1	ICAM1	P05362
HERB	cis-Piplartine	643764	VABYUUZNAVQNPG-BQYQJAHWSA-N	20069-09-4	96.65	0.24	Cathepsin (V and K)	CTSV	O60911
HERB	cis-Piplartine	643764	VABYUUZNAVQNPG-BQYQJAHWSA-N	20069-09-4	96.65	0.24	Vascular cell adhesion protein 1	VCAM1	P19320
HERB	cis-Piplartine	643764	VABYUUZNAVQNPG-BQYQJAHWSA-N	20069-09-4	96.65	0.24	Cathepsin L	CTSL	P07711
HERB	cis-Piplartine	643764	VABYUUZNAVQNPG-BQYQJAHWSA-N	20069-09-4	96.65	0.24	Selectin E	SELE	P16581
HERB	cis-Piplartine	643764	VABYUUZNAVQNPG-BQYQJAHWSA-N	20069-09-4	96.65	0.24	Ribosomal protein S6 kinase alpha 2	RPS6KA2	Q15349
HERB	cis-Piplartine	643764	VABYUUZNAVQNPG-BQYQJAHWSA-N	20069-09-4	96.65	0.24	N-acylsphingosine-amidohydrolase	NAAA	Q02083
HERB	cis-Piplartine	643764	VABYUUZNAVQNPG-BQYQJAHWSA-N	20069-09-4	96.65	0.24	Bromodomain adjacent to zinc finger domain protein 2B	BAZ2B	Q9UIF8
HERB	cis-Piplartine	643764	VABYUUZNAVQNPG-BQYQJAHWSA-N	20069-09-4	96.65	0.24	Bromodomain adjacent to zinc finger domain protein 2A	BAZ2A	Q9UIF9
HERB	cis-Piplartine	643764	VABYUUZNAVQNPG-BQYQJAHWSA-N	20069-09-4	96.65	0.24	Geranylgeranyl transferase type I	PGGT1B FNTA	P53609 P49354
HERB	cis-Piplartine	643764	VABYUUZNAVQNPG-BQYQJAHWSA-N	20069-09-4	96.65	0.24	Metabotropic glutamate receptor 4	GRM4	Q14833
HERB	cis-Piplartine	643764	VABYUUZNAVQNPG-BQYQJAHWSA-N	20069-09-4	96.65	0.24	Ileal bile acid transporter	SLC10A2	Q12908
HERB	cis-Piplartine	643764	VABYUUZNAVQNPG-BQYQJAHWSA-N	20069-09-4	96.65	0.24	Fibroblast activation protein alpha (by homology)	FAP	Q12884
HERB	cis-Piplartine	643764	VABYUUZNAVQNPG-BQYQJAHWSA-N	20069-09-4	96.65	0.24	Histone deacetylase 3	HDAC3	O15379
HERB	cis-Piplartine	643764	VABYUUZNAVQNPG-BQYQJAHWSA-N	20069-09-4	96.65	0.24	Prolyl endopeptidase	PREP	P48147
HERB	cis-Piplartine	643764	VABYUUZNAVQNPG-BQYQJAHWSA-N	20069-09-4	96.65	0.24	Tyrosine-protein kinase HCK	HCK	P08631
HERB	cis-Piplartine	643764	VABYUUZNAVQNPG-BQYQJAHWSA-N	20069-09-4	96.65	0.24	PI4-kinase beta subunit	PI4KB	Q9UBF8
HERB	cis-Piplartine	643764	VABYUUZNAVQNPG-BQYQJAHWSA-N	20069-09-4	96.65	0.24	Phosphodiesterase 9A	PDE9A	O76083
HERB	cis-Piplartine	643764	VABYUUZNAVQNPG-BQYQJAHWSA-N	20069-09-4	96.65	0.24	Dual specificity mitogen-activated protein kinase kinase 1	MAP2K1	Q02750
HERB	cis-Piplartine	643764	VABYUUZNAVQNPG-BQYQJAHWSA-N	20069-09-4	96.65	0.24	MAP kinase ERK2	MAPK1	P28482
HERB	cis-Piplartine	643764	VABYUUZNAVQNPG-BQYQJAHWSA-N	20069-09-4	96.65	0.24	Butyrylcholinesterase	BCHE	P06276
HERB	cis-Piplartine	643764	VABYUUZNAVQNPG-BQYQJAHWSA-N	20069-09-4	96.65	0.24	CDK9/cyclin T1	CDK9 CCNT1	P50750 O60563
HERB	cis-Piplartine	643764	VABYUUZNAVQNPG-BQYQJAHWSA-N	20069-09-4	96.65	0.24	Adenosine A1 receptor (by homology)	ADORA1	P30542
HERB	cis-Piplartine	643764	VABYUUZNAVQNPG-BQYQJAHWSA-N	20069-09-4	96.65	0.24	c-Jun N-terminal kinase 1	MAPK8	P45983
HERB	cis-Piplartine	643764	VABYUUZNAVQNPG-BQYQJAHWSA-N	20069-09-4	96.65	0.24	Bradykinin B2 receptor	BDKRB2	P30411
HERB	cis-Piplartine	643764	VABYUUZNAVQNPG-BQYQJAHWSA-N	20069-09-4	96.65	0.24	Ribosomal protein S6 kinase 1	RPS6KB1	P23443
HERB	cis-Piplartine	643764	VABYUUZNAVQNPG-BQYQJAHWSA-N	20069-09-4	96.65	0.24	Macrophage colony stimulating factor receptor	CSF1R	P07333
HERB	cis-Piplartine	643764	VABYUUZNAVQNPG-BQYQJAHWSA-N	20069-09-4	96.65	0.24	Serine/threonine-protein kinase B-raf	BRAF	P15056
HERB	cis-Piplartine	643764	VABYUUZNAVQNPG-BQYQJAHWSA-N	20069-09-4	96.65	0.24	Serine/threonine-protein kinase TNNI3K	TNNI3K	Q59H18
HERB	cis-Piplartine	643764	VABYUUZNAVQNPG-BQYQJAHWSA-N	20069-09-4	96.65	0.24	MAP kinase-activated protein kinase 2	MAPKAPK2	P49137
HERB	cis-Piplartine	643764	VABYUUZNAVQNPG-BQYQJAHWSA-N	20069-09-4	96.65	0.24	Cyclin-dependent kinase 1	CDK1	P06493
HERB	cis-Piplartine	643764	VABYUUZNAVQNPG-BQYQJAHWSA-N	20069-09-4	96.65	0.24	Tumor necrosis factor receptor R1	TNFRSF1A	P19438
HERB	cis-Piplartine	643764	VABYUUZNAVQNPG-BQYQJAHWSA-N	20069-09-4	96.65	0.24	Glutamate NMDA receptor; GRIN1/GRIN2A	GRIN2A GRIN1	Q12879 Q05586
HERB	cis-Piplartine	643764	VABYUUZNAVQNPG-BQYQJAHWSA-N	20069-09-4	96.65	0.24	Adenosine A2b receptor	ADORA2B	P29275
HERB	cis-Piplartine	643764	VABYUUZNAVQNPG-BQYQJAHWSA-N	20069-09-4	96.65	0.24	CDK8/Cyclin C	CCNC CDK8	P24863 P49336
HERB	cis-Piplartine	643764	VABYUUZNAVQNPG-BQYQJAHWSA-N	20069-09-4	96.65	0.24	Monoglyceride lipase	MGLL	Q99685
HERB	cis-Piplartine	643764	VABYUUZNAVQNPG-BQYQJAHWSA-N	20069-09-4	96.65	0.24	Cell division protein kinase 8	CDK8	P49336
HERB	cis-Piplartine	643764	VABYUUZNAVQNPG-BQYQJAHWSA-N	20069-09-4	96.65	0.24	Prostanoid EP2 receptor	PTGER2	P43116
HERB	cis-Piplartine	643764	VABYUUZNAVQNPG-BQYQJAHWSA-N	20069-09-4	96.65	0.24	Dipeptidyl peptidase IV	DPP4	P27487
HERB	cis-Piplartine	643764	VABYUUZNAVQNPG-BQYQJAHWSA-N	20069-09-4	96.65	0.24	MAP kinase signal-integrating kinase 2	MKNK2	Q9HBH9
HERB	cis-Piplartine	643764	VABYUUZNAVQNPG-BQYQJAHWSA-N	20069-09-4	96.65	0.24	MAP kinase-interacting serine/threonine-protein kinase MNK1	MKNK1	Q9BUB5
HERB	cis-Piplartine	643764	VABYUUZNAVQNPG-BQYQJAHWSA-N	20069-09-4	96.65	0.24	Solute carrier family 22 member 12	SLC22A12	Q96S37
HERB	cis-Piplartine	643764	VABYUUZNAVQNPG-BQYQJAHWSA-N	20069-09-4	96.65	0.24	Alpha-1a adrenergic receptor (by homology)	ADRA1A	P35348
HERB	cis-Piplartine	643764	VABYUUZNAVQNPG-BQYQJAHWSA-N	20069-09-4	96.65	0.24	Alpha-1b adrenergic receptor	ADRA1B	P35368
HERB	3-Deoxyaconitine	78358503	PHASMOUKYDUAOZ-ZDKSWHTHSA-N	3175-95-9	30.96	0.24	Dopamine transporter (by homology)	SLC6A3	Q01959
HERB	3-Deoxyaconitine	78358503	PHASMOUKYDUAOZ-ZDKSWHTHSA-N	3175-95-9	30.96	0.24	HERG	KCNH2	Q12809
HERB	3-Deoxyaconitine	78358503	PHASMOUKYDUAOZ-ZDKSWHTHSA-N	3175-95-9	30.96	0.24	Serotonin transporter	SLC6A4	P31645
HERB	3-Deoxyaconitine	78358503	PHASMOUKYDUAOZ-ZDKSWHTHSA-N	3175-95-9	30.96	0.24	Sigma opioid receptor	SIGMAR1	Q99720
HERB	3-Deoxyaconitine	78358503	PHASMOUKYDUAOZ-ZDKSWHTHSA-N	3175-95-9	30.96	0.24	Muscarinic acetylcholine receptor M3	CHRM3	P20309
HERB	3-Deoxyaconitine	78358503	PHASMOUKYDUAOZ-ZDKSWHTHSA-N	3175-95-9	30.96	0.24	Butyrylcholinesterase	BCHE	P06276
HERB	3-Deoxyaconitine	78358503	PHASMOUKYDUAOZ-ZDKSWHTHSA-N	3175-95-9	30.96	0.24	Neuronal acetylcholine receptor protein alpha-7 subunit	CHRNA7	P36544
HERB	3-Deoxyaconitine	78358503	PHASMOUKYDUAOZ-ZDKSWHTHSA-N	3175-95-9	30.96	0.24	Norepinephrine transporter	SLC6A2	P23975
HERB	3-Deoxyaconitine	78358503	PHASMOUKYDUAOZ-ZDKSWHTHSA-N	3175-95-9	30.96	0.24	ATP-sensitive inward rectifier potassium channel 1	KCNJ1	P48048
HERB	3-Deoxyaconitine	78358503	PHASMOUKYDUAOZ-ZDKSWHTHSA-N	3175-95-9	30.96	0.24	Muscarinic acetylcholine receptor M2	CHRM2	P08172
HERB	3-Deoxyaconitine	78358503	PHASMOUKYDUAOZ-ZDKSWHTHSA-N	3175-95-9	30.96	0.24	Beta secretase 2	BACE2	Q9Y5Z0
HERB	3-Deoxyaconitine	78358503	PHASMOUKYDUAOZ-ZDKSWHTHSA-N	3175-95-9	30.96	0.24	Muscarinic acetylcholine receptor M1	CHRM1	P11229
HERB	3-Deoxyaconitine	78358503	PHASMOUKYDUAOZ-ZDKSWHTHSA-N	3175-95-9	30.96	0.24	Adenosine A3 receptor	ADORA3	P0DMS8
HERB	3-Deoxyaconitine	78358503	PHASMOUKYDUAOZ-ZDKSWHTHSA-N	3175-95-9	30.96	0.24	Oligosaccharyl transferase 48 kDa subunit	DDOST	P39656
HERB	3-Deoxyaconitine	78358503	PHASMOUKYDUAOZ-ZDKSWHTHSA-N	3175-95-9	30.96	0.24	Serine/threonine-protein kinase mTOR	MTOR	P42345
HERB	3-Deoxyaconitine	78358503	PHASMOUKYDUAOZ-ZDKSWHTHSA-N	3175-95-9	30.96	0.24	PI3-kinase p110-alpha subunit	PIK3CA	P42336
HERB	3-Deoxyaconitine	78358503	PHASMOUKYDUAOZ-ZDKSWHTHSA-N	3175-95-9	30.96	0.24	Serotonin 2b (5-HT2b) receptor	HTR2B	P41595
HERB	3-Deoxyaconitine	78358503	PHASMOUKYDUAOZ-ZDKSWHTHSA-N	3175-95-9	30.96	0.24	Serotonin 2c (5-HT2c) receptor	HTR2C	P28335
HERB	3-Deoxyaconitine	78358503	PHASMOUKYDUAOZ-ZDKSWHTHSA-N	3175-95-9	30.96	0.24	Phosphodiesterase 11A	PDE11A	Q9HCR9
HERB	3-Deoxyaconitine	78358503	PHASMOUKYDUAOZ-ZDKSWHTHSA-N	3175-95-9	30.96	0.24	Brain adenylate cyclase 1	ADCY1	Q08828
HERB	3-Deoxyaconitine	78358503	PHASMOUKYDUAOZ-ZDKSWHTHSA-N	3175-95-9	30.96	0.24	Phosphodiesterase 10A	PDE10A	Q9Y233
HERB	3-Deoxyaconitine	78358503	PHASMOUKYDUAOZ-ZDKSWHTHSA-N	3175-95-9	30.96	0.24	Beta-glucocerebrosidase	GBA	P04062
HERB	3-Deoxyaconitine	78358503	PHASMOUKYDUAOZ-ZDKSWHTHSA-N	3175-95-9	30.96	0.24	Beta-glucosidase	GBA2	Q9HCG7
HERB	3-Deoxyaconitine	78358503	PHASMOUKYDUAOZ-ZDKSWHTHSA-N	3175-95-9	30.96	0.24	Serotonin 2a (5-HT2a) receptor	HTR2A	P28223
HERB	3-Deoxyaconitine	78358503	PHASMOUKYDUAOZ-ZDKSWHTHSA-N	3175-95-9	30.96	0.24	Carbonic anhydrase II	CA2	P00918
HERB	3-Deoxyaconitine	78358503	PHASMOUKYDUAOZ-ZDKSWHTHSA-N	3175-95-9	30.96	0.24	PI3-kinase p110-delta subunit	PIK3CD	O00329
HERB	3-Deoxyaconitine	78358503	PHASMOUKYDUAOZ-ZDKSWHTHSA-N	3175-95-9	30.96	0.24	PI3-kinase p110-beta subunit	PIK3CB	P42338
HERB	3-Deoxyaconitine	78358503	PHASMOUKYDUAOZ-ZDKSWHTHSA-N	3175-95-9	30.96	0.24	PI3-kinase p110-gamma subunit	PIK3CG	P48736
HERB	N-(2,5-dimethoxyphenyl)-4-methoxybenzamide	532276	CFFUCEHTAUTSAT-UHFFFAOYSA-N	NA	60.7	0.18	Estradiol 17-beta-dehydrogenase 2	HSD17B2	P37059
HERB	N-(2,5-dimethoxyphenyl)-4-methoxybenzamide	532276	CFFUCEHTAUTSAT-UHFFFAOYSA-N	NA	60.7	0.18	Estradiol 17-beta-dehydrogenase 1	HSD17B1	P14061
HERB	N-(2,5-dimethoxyphenyl)-4-methoxybenzamide	532276	CFFUCEHTAUTSAT-UHFFFAOYSA-N	NA	60.7	0.18	Histone deacetylase 1	HDAC1	Q13547
HERB	N-(2,5-dimethoxyphenyl)-4-methoxybenzamide	532276	CFFUCEHTAUTSAT-UHFFFAOYSA-N	NA	60.7	0.18	Thrombin and coagulation factor X	F10	P00742
HERB	N-(2,5-dimethoxyphenyl)-4-methoxybenzamide	532276	CFFUCEHTAUTSAT-UHFFFAOYSA-N	NA	60.7	0.18	Urokinase-type plasminogen activator	PLAU	P00749
HERB	N-(2,5-dimethoxyphenyl)-4-methoxybenzamide	532276	CFFUCEHTAUTSAT-UHFFFAOYSA-N	NA	60.7	0.18	Histone deacetylase 2	HDAC2	Q92769
HERB	N-(2,5-dimethoxyphenyl)-4-methoxybenzamide	532276	CFFUCEHTAUTSAT-UHFFFAOYSA-N	NA	60.7	0.18	Histone deacetylase 6	HDAC6	Q9UBN7
HERB	N-(2,5-dimethoxyphenyl)-4-methoxybenzamide	532276	CFFUCEHTAUTSAT-UHFFFAOYSA-N	NA	60.7	0.18	Trace amine-associated receptor 1 (by homology)	TAAR1	Q96RJ0
HERB	N-(2,5-dimethoxyphenyl)-4-methoxybenzamide	532276	CFFUCEHTAUTSAT-UHFFFAOYSA-N	NA	60.7	0.18	Thrombin	F2	P00734
HERB	N-(2,5-dimethoxyphenyl)-4-methoxybenzamide	532276	CFFUCEHTAUTSAT-UHFFFAOYSA-N	NA	60.7	0.18	Potassium channel subfamily K member 9	KCNK9	Q9NPC2
HERB	N-(2,5-dimethoxyphenyl)-4-methoxybenzamide	532276	CFFUCEHTAUTSAT-UHFFFAOYSA-N	NA	60.7	0.18	Histone deacetylase 3	HDAC3	O15379
HERB	N-(2,5-dimethoxyphenyl)-4-methoxybenzamide	532276	CFFUCEHTAUTSAT-UHFFFAOYSA-N	NA	60.7	0.18	Quinone reductase 2	NQO2	P16083
HERB	N-(2,5-dimethoxyphenyl)-4-methoxybenzamide	532276	CFFUCEHTAUTSAT-UHFFFAOYSA-N	NA	60.7	0.18	Androgen Receptor	AR	P10275
HERB	N-(2,5-dimethoxyphenyl)-4-methoxybenzamide	532276	CFFUCEHTAUTSAT-UHFFFAOYSA-N	NA	60.7	0.18	Dual specificity mitogen-activated protein kinase kinase 1	MAP2K1	Q02750
HERB	N-(2,5-dimethoxyphenyl)-4-methoxybenzamide	532276	CFFUCEHTAUTSAT-UHFFFAOYSA-N	NA	60.7	0.18	Epidermal growth factor receptor erbB1	EGFR	P00533
HERB	N-(2,5-dimethoxyphenyl)-4-methoxybenzamide	532276	CFFUCEHTAUTSAT-UHFFFAOYSA-N	NA	60.7	0.18	Dual-specificity tyrosine-phosphorylation regulated kinase 1A	DYRK1A	Q13627
HERB	N-(2,5-dimethoxyphenyl)-4-methoxybenzamide	532276	CFFUCEHTAUTSAT-UHFFFAOYSA-N	NA	60.7	0.18	Protein kinase C alpha	PRKCA	P17252
HERB	N-(2,5-dimethoxyphenyl)-4-methoxybenzamide	532276	CFFUCEHTAUTSAT-UHFFFAOYSA-N	NA	60.7	0.18	Serine/threonine-protein kinase PLK1	PLK1	P53350
HERB	N-(2,5-dimethoxyphenyl)-4-methoxybenzamide	532276	CFFUCEHTAUTSAT-UHFFFAOYSA-N	NA	60.7	0.18	Protein kinase C theta	PRKCQ	Q04759
HERB	N-(2,5-dimethoxyphenyl)-4-methoxybenzamide	532276	CFFUCEHTAUTSAT-UHFFFAOYSA-N	NA	60.7	0.18	Histone deacetylase 8	HDAC8	Q9BY41
HERB	N-(2,5-dimethoxyphenyl)-4-methoxybenzamide	532276	CFFUCEHTAUTSAT-UHFFFAOYSA-N	NA	60.7	0.18	Protein kinase C epsilon	PRKCE	Q02156
HERB	N-(2,5-dimethoxyphenyl)-4-methoxybenzamide	532276	CFFUCEHTAUTSAT-UHFFFAOYSA-N	NA	60.7	0.18	Protein kinase C eta	PRKCH	P24723
HERB	N-(2,5-dimethoxyphenyl)-4-methoxybenzamide	532276	CFFUCEHTAUTSAT-UHFFFAOYSA-N	NA	60.7	0.18	Dual specificty protein kinase CLK1	CLK1	P49759
HERB	N-(2,5-dimethoxyphenyl)-4-methoxybenzamide	532276	CFFUCEHTAUTSAT-UHFFFAOYSA-N	NA	60.7	0.18	Monoamine oxidase B	MAOB	P27338
HERB	N-(2,5-dimethoxyphenyl)-4-methoxybenzamide	532276	CFFUCEHTAUTSAT-UHFFFAOYSA-N	NA	60.7	0.18	Potassium channel subfamily K member 3	KCNK3	O14649
HERB	N-(2,5-dimethoxyphenyl)-4-methoxybenzamide	532276	CFFUCEHTAUTSAT-UHFFFAOYSA-N	NA	60.7	0.18	c-Jun N-terminal kinase 3	MAPK10	P53779
HERB	N-(2,5-dimethoxyphenyl)-4-methoxybenzamide	532276	CFFUCEHTAUTSAT-UHFFFAOYSA-N	NA	60.7	0.18	c-Jun N-terminal kinase 2	MAPK9	P45984
HERB	N-(2,5-dimethoxyphenyl)-4-methoxybenzamide	532276	CFFUCEHTAUTSAT-UHFFFAOYSA-N	NA	60.7	0.18	PI3-kinase p110-gamma subunit	PIK3CG	P48736
HERB	N-(2,5-dimethoxyphenyl)-4-methoxybenzamide	532276	CFFUCEHTAUTSAT-UHFFFAOYSA-N	NA	60.7	0.18	Nitric-oxide synthase, brain	NOS1	P29475
HERB	N-(2,5-dimethoxyphenyl)-4-methoxybenzamide	532276	CFFUCEHTAUTSAT-UHFFFAOYSA-N	NA	60.7	0.18	PI3-kinase p110-alpha subunit	PIK3CA	P42336
HERB	N-(2,5-dimethoxyphenyl)-4-methoxybenzamide	532276	CFFUCEHTAUTSAT-UHFFFAOYSA-N	NA	60.7	0.18	Nitric oxide synthase, inducible	NOS2	P35228
HERB	N-(2,5-dimethoxyphenyl)-4-methoxybenzamide	532276	CFFUCEHTAUTSAT-UHFFFAOYSA-N	NA	60.7	0.18	Phosphodiesterase 4D	PDE4D	Q08499
HERB	N-(2,5-dimethoxyphenyl)-4-methoxybenzamide	532276	CFFUCEHTAUTSAT-UHFFFAOYSA-N	NA	60.7	0.18	Leucine-rich repeat serine/threonine-protein kinase 2	LRRK2	Q5S007
HERB	N-(2,5-dimethoxyphenyl)-4-methoxybenzamide	532276	CFFUCEHTAUTSAT-UHFFFAOYSA-N	NA	60.7	0.18	Bromodomain-containing protein 9	BRD9	Q9H8M2
HERB	N-(2,5-dimethoxyphenyl)-4-methoxybenzamide	532276	CFFUCEHTAUTSAT-UHFFFAOYSA-N	NA	60.7	0.18	Tissue-type plasminogen activator	PLAT	P00750
HERB	N-(2,5-dimethoxyphenyl)-4-methoxybenzamide	532276	CFFUCEHTAUTSAT-UHFFFAOYSA-N	NA	60.7	0.18	Phosphodiesterase 3	PDE3A	Q14432
HERB	N-(2,5-dimethoxyphenyl)-4-methoxybenzamide	532276	CFFUCEHTAUTSAT-UHFFFAOYSA-N	NA	60.7	0.18	Phosphodiesterase 3B	PDE3B	Q13370
HERB	N-(2,5-dimethoxyphenyl)-4-methoxybenzamide	532276	CFFUCEHTAUTSAT-UHFFFAOYSA-N	NA	60.7	0.18	Phosphodiesterase 9A	PDE9A	O76083
HERB	N-(2,5-dimethoxyphenyl)-4-methoxybenzamide	532276	CFFUCEHTAUTSAT-UHFFFAOYSA-N	NA	60.7	0.18	ADAM17	ADAM17	P78536
HERB	N-(2,5-dimethoxyphenyl)-4-methoxybenzamide	532276	CFFUCEHTAUTSAT-UHFFFAOYSA-N	NA	60.7	0.18	Cyclin-dependent kinase 4/cyclin D	CCND3 CCND1 CDK4 CCND2	P30281 P24385 P11802 P30279
HERB	N-(2,5-dimethoxyphenyl)-4-methoxybenzamide	532276	CFFUCEHTAUTSAT-UHFFFAOYSA-N	NA	60.7	0.18	Dual specificity protein kinase TTK	TTK	P33981
HERB	N-(2,5-dimethoxyphenyl)-4-methoxybenzamide	532276	CFFUCEHTAUTSAT-UHFFFAOYSA-N	NA	60.7	0.18	Plasma kallikrein	KLKB1	P03952
HERB	N-(2,5-dimethoxyphenyl)-4-methoxybenzamide	532276	CFFUCEHTAUTSAT-UHFFFAOYSA-N	NA	60.7	0.18	Casein kinase I delta	CSNK1D	P48730
HERB	N-(2,5-dimethoxyphenyl)-4-methoxybenzamide	532276	CFFUCEHTAUTSAT-UHFFFAOYSA-N	NA	60.7	0.18	Matrix metalloproteinase 10	MMP10	P09238
HERB	N-(2,5-dimethoxyphenyl)-4-methoxybenzamide	532276	CFFUCEHTAUTSAT-UHFFFAOYSA-N	NA	60.7	0.18	TGF-beta receptor type I	TGFBR1	P36897
HERB	N-(2,5-dimethoxyphenyl)-4-methoxybenzamide	532276	CFFUCEHTAUTSAT-UHFFFAOYSA-N	NA	60.7	0.18	Matrix metalloproteinase 8	MMP8	P22894
HERB	N-(2,5-dimethoxyphenyl)-4-methoxybenzamide	532276	CFFUCEHTAUTSAT-UHFFFAOYSA-N	NA	60.7	0.18	Melanin-concentrating hormone receptor 1	MCHR1	Q99705
HERB	N-(2,5-dimethoxyphenyl)-4-methoxybenzamide	532276	CFFUCEHTAUTSAT-UHFFFAOYSA-N	NA	60.7	0.18	Trypsin I	PRSS1	P07477
HERB	N-(2,5-dimethoxyphenyl)-4-methoxybenzamide	532276	CFFUCEHTAUTSAT-UHFFFAOYSA-N	NA	60.7	0.18	Cyclin-dependent kinase 4/cyclin D1	CCND1 CDK4	P24385 P11802
HERB	N-(2,5-dimethoxyphenyl)-4-methoxybenzamide	532276	CFFUCEHTAUTSAT-UHFFFAOYSA-N	NA	60.7	0.18	Platelet-derived growth factor receptor alpha	PDGFRA	P16234
HERB	N-(2,5-dimethoxyphenyl)-4-methoxybenzamide	532276	CFFUCEHTAUTSAT-UHFFFAOYSA-N	NA	60.7	0.18	Acyl coenzyme A:cholesterol acyltransferase	CES1	P23141
HERB	N-(2,5-dimethoxyphenyl)-4-methoxybenzamide	532276	CFFUCEHTAUTSAT-UHFFFAOYSA-N	NA	60.7	0.18	Carboxylesterase 2	CES2	O00748
HERB	N-(2,5-dimethoxyphenyl)-4-methoxybenzamide	532276	CFFUCEHTAUTSAT-UHFFFAOYSA-N	NA	60.7	0.18	Serine/threonine-protein kinase PLK4	PLK4	O00444
HERB	N-(2,5-dimethoxyphenyl)-4-methoxybenzamide	532276	CFFUCEHTAUTSAT-UHFFFAOYSA-N	NA	60.7	0.18	Ephrin receptor	EPHB4	P54760
HERB	N-(2,5-dimethoxyphenyl)-4-methoxybenzamide	532276	CFFUCEHTAUTSAT-UHFFFAOYSA-N	NA	60.7	0.18	CDK8/Cyclin C	CCNC CDK8	P24863 P49336
HERB	N-(2,5-dimethoxyphenyl)-4-methoxybenzamide	532276	CFFUCEHTAUTSAT-UHFFFAOYSA-N	NA	60.7	0.18	Cell division protein kinase 8	CDK8	P49336
HERB	N-(2,5-dimethoxyphenyl)-4-methoxybenzamide	532276	CFFUCEHTAUTSAT-UHFFFAOYSA-N	NA	60.7	0.18	Tyrosine-protein kinase JAK3	JAK3	P52333
HERB	N-(2,5-dimethoxyphenyl)-4-methoxybenzamide	532276	CFFUCEHTAUTSAT-UHFFFAOYSA-N	NA	60.7	0.18	Caspase-3	CASP3	P42574
HERB	N-(2,5-dimethoxyphenyl)-4-methoxybenzamide	532276	CFFUCEHTAUTSAT-UHFFFAOYSA-N	NA	60.7	0.18	Myeloperoxidase	MPO	P05164
HERB	N-(2,5-dimethoxyphenyl)-4-methoxybenzamide	532276	CFFUCEHTAUTSAT-UHFFFAOYSA-N	NA	60.7	0.18	Protein-glutamine gamma-glutamyltransferase	TGM2	P21980
HERB	N-(2,5-dimethoxyphenyl)-4-methoxybenzamide	532276	CFFUCEHTAUTSAT-UHFFFAOYSA-N	NA	60.7	0.18	Protein-glutamine gamma-glutamyltransferase K	TGM1	P22735
HERB	N-(2,5-dimethoxyphenyl)-4-methoxybenzamide	532276	CFFUCEHTAUTSAT-UHFFFAOYSA-N	NA	60.7	0.18	Protein-glutamine glutamyltransferase E	TGM3	Q08188
HERB	N-(2,5-dimethoxyphenyl)-4-methoxybenzamide	532276	CFFUCEHTAUTSAT-UHFFFAOYSA-N	NA	60.7	0.18	Cyclin-dependent kinase 4	CDK4	P11802
HERB	N-(2,5-dimethoxyphenyl)-4-methoxybenzamide	532276	CFFUCEHTAUTSAT-UHFFFAOYSA-N	NA	60.7	0.18	p53-binding protein Mdm-2	MDM2	Q00987
HERB	N-(2,5-dimethoxyphenyl)-4-methoxybenzamide	532276	CFFUCEHTAUTSAT-UHFFFAOYSA-N	NA	60.7	0.18	Gamma-secretase	PSEN2 PSENEN NCSTN APH1A PSEN1 APH1B	P49810 Q9NZ42 Q92542 Q96BI3 P49768 Q8WW43
HERB	N-(2,5-dimethoxyphenyl)-4-methoxybenzamide	532276	CFFUCEHTAUTSAT-UHFFFAOYSA-N	NA	60.7	0.18	Vascular endothelial growth factor receptor 2	KDR	P35968
HERB	N-(2,5-dimethoxyphenyl)-4-methoxybenzamide	532276	CFFUCEHTAUTSAT-UHFFFAOYSA-N	NA	60.7	0.18	Carbonic anhydrase VI	CA6	P23280
HERB	N-(2,5-dimethoxyphenyl)-4-methoxybenzamide	532276	CFFUCEHTAUTSAT-UHFFFAOYSA-N	NA	60.7	0.18	Carbonic anhydrase XIII	CA13	Q8N1Q1
HERB	N-(2,5-dimethoxyphenyl)-4-methoxybenzamide	532276	CFFUCEHTAUTSAT-UHFFFAOYSA-N	NA	60.7	0.18	GABA-A receptor; alpha-3/beta-3/gamma-2	GABRB3 GABRA3 GABRG2	P28472 P34903 P18507
HERB	N-(2,5-dimethoxyphenyl)-4-methoxybenzamide	532276	CFFUCEHTAUTSAT-UHFFFAOYSA-N	NA	60.7	0.18	GABA-A receptor; alpha-1/beta-3/gamma-2	GABRB3 GABRG2 GABRA1	P28472 P18507 P14867
HERB	N-(2,5-dimethoxyphenyl)-4-methoxybenzamide	532276	CFFUCEHTAUTSAT-UHFFFAOYSA-N	NA	60.7	0.18	GABA-A receptor; alpha-5/beta-3/gamma-2	GABRB3 GABRG2 GABRA5	P28472 P18507 P31644
HERB	N-(2,5-dimethoxyphenyl)-4-methoxybenzamide	532276	CFFUCEHTAUTSAT-UHFFFAOYSA-N	NA	60.7	0.18	Potassium-transporting ATPase	ATP4B ATP4A	P51164 P20648
HERB	N-(2,5-dimethoxyphenyl)-4-methoxybenzamide	532276	CFFUCEHTAUTSAT-UHFFFAOYSA-N	NA	60.7	0.18	Platelet-derived growth factor receptor	PDGFRA PDGFRB	P16234 P09619
HERB	N-(2,5-dimethoxyphenyl)-4-methoxybenzamide	532276	CFFUCEHTAUTSAT-UHFFFAOYSA-N	NA	60.7	0.18	GABA-A receptor; alpha-6/beta-3/gamma-2	GABRG2 GABRB3 GABRA6	P18507 P28472 Q16445
HERB	N-(2,5-dimethoxyphenyl)-4-methoxybenzamide	532276	CFFUCEHTAUTSAT-UHFFFAOYSA-N	NA	60.7	0.18	Phosphoglycerate kinase 1	PGK1	P00558
HERB	N-(2,5-dimethoxyphenyl)-4-methoxybenzamide	532276	CFFUCEHTAUTSAT-UHFFFAOYSA-N	NA	60.7	0.18	Fatty acid synthase	FASN	P49327
HERB	N-(2,5-dimethoxyphenyl)-4-methoxybenzamide	532276	CFFUCEHTAUTSAT-UHFFFAOYSA-N	NA	60.7	0.18	Caspase-7	CASP7	P55210
HERB	N-(2,5-dimethoxyphenyl)-4-methoxybenzamide	532276	CFFUCEHTAUTSAT-UHFFFAOYSA-N	NA	60.7	0.18	Chymase	CMA1	P23946
HERB	N-(2,5-dimethoxyphenyl)-4-methoxybenzamide	532276	CFFUCEHTAUTSAT-UHFFFAOYSA-N	NA	60.7	0.18	MAP kinase signal-integrating kinase 2	MKNK2	Q9HBH9
HERB	N-(2,5-dimethoxyphenyl)-4-methoxybenzamide	532276	CFFUCEHTAUTSAT-UHFFFAOYSA-N	NA	60.7	0.18	MAP kinase-interacting serine/threonine-protein kinase MNK1	MKNK1	Q9BUB5
HERB	N-(2,5-dimethoxyphenyl)-4-methoxybenzamide	532276	CFFUCEHTAUTSAT-UHFFFAOYSA-N	NA	60.7	0.18	Serine/threonine-protein kinase WEE1	WEE1	P30291
HERB	N-(2,5-dimethoxyphenyl)-4-methoxybenzamide	532276	CFFUCEHTAUTSAT-UHFFFAOYSA-N	NA	60.7	0.18	UDP-N-acetylglucosamine--peptide N-acetylglucosaminyltransferase 110 kDa subunit	OGT	O15294
HERB	N-(2,5-dimethoxyphenyl)-4-methoxybenzamide	532276	CFFUCEHTAUTSAT-UHFFFAOYSA-N	NA	60.7	0.18	Inhibitor of nuclear factor kappa B kinase beta subunit	IKBKB	O14920
HERB	N-(2,5-dimethoxyphenyl)-4-methoxybenzamide	532276	CFFUCEHTAUTSAT-UHFFFAOYSA-N	NA	60.7	0.18	Steryl-sulfatase	STS	P08842
HERB	N-(2,5-dimethoxyphenyl)-4-methoxybenzamide	532276	CFFUCEHTAUTSAT-UHFFFAOYSA-N	NA	60.7	0.18	Quinone reductase 1	NQO1	P15559
HERB	N-(2,5-dimethoxyphenyl)-4-methoxybenzamide	532276	CFFUCEHTAUTSAT-UHFFFAOYSA-N	NA	60.7	0.18	ALK tyrosine kinase receptor	ALK	Q9UM73
HERB	N-(2,5-dimethoxyphenyl)-4-methoxybenzamide	532276	CFFUCEHTAUTSAT-UHFFFAOYSA-N	NA	60.7	0.18	Serine/threonine-protein kinase PIM3	PIM3	Q86V86
HERB	N-(2,5-dimethoxyphenyl)-4-methoxybenzamide	532276	CFFUCEHTAUTSAT-UHFFFAOYSA-N	NA	60.7	0.18	Receptor protein-tyrosine kinase erbB-2	ERBB2	P04626
HERB	N-(2,5-dimethoxyphenyl)-4-methoxybenzamide	532276	CFFUCEHTAUTSAT-UHFFFAOYSA-N	NA	60.7	0.18	Carnitine O-palmitoyltransferase 1, liver isoform	CPT1A	P50416
HERB	N-(2,5-dimethoxyphenyl)-4-methoxybenzamide	532276	CFFUCEHTAUTSAT-UHFFFAOYSA-N	NA	60.7	0.18	PI3-kinase p110-alpha/p85-alpha	PIK3CA PIK3R1	P42336 P27986
HERB	N-(2,5-dimethoxyphenyl)-4-methoxybenzamide	532276	CFFUCEHTAUTSAT-UHFFFAOYSA-N	NA	60.7	0.18	Proto-oncogene tyrosine-protein kinase MER	MERTK	Q12866
HERB	N-(2,5-dimethoxyphenyl)-4-methoxybenzamide	532276	CFFUCEHTAUTSAT-UHFFFAOYSA-N	NA	60.7	0.18	Bromodomain-containing protein 2	BRD2	P25440
HERB	N-(2,5-dimethoxyphenyl)-4-methoxybenzamide	532276	CFFUCEHTAUTSAT-UHFFFAOYSA-N	NA	60.7	0.18	MAP kinase-activated protein kinase 2	MAPKAPK2	P49137
HERB	N-(2,5-dimethoxyphenyl)-4-methoxybenzamide	532276	CFFUCEHTAUTSAT-UHFFFAOYSA-N	NA	60.7	0.18	Cyclin-dependent kinase 1	CDK1	P06493
HERB	N-(2,5-dimethoxyphenyl)-4-methoxybenzamide	532276	CFFUCEHTAUTSAT-UHFFFAOYSA-N	NA	60.7	0.18	Rho-associated protein kinase 1	ROCK1	Q13464
HERB	N-(2,5-dimethoxyphenyl)-4-methoxybenzamide	532276	CFFUCEHTAUTSAT-UHFFFAOYSA-N	NA	60.7	0.18	Orexin receptor 2	HCRTR2	O43614
HERB	N-(2,5-dimethoxyphenyl)-4-methoxybenzamide	532276	CFFUCEHTAUTSAT-UHFFFAOYSA-N	NA	60.7	0.18	Orexin receptor 1	HCRTR1	O43613
HERB	N-(2,5-dimethoxyphenyl)-4-methoxybenzamide	532276	CFFUCEHTAUTSAT-UHFFFAOYSA-N	NA	60.7	0.18	Rho-associated protein kinase 2	ROCK2	O75116
HERB	N-(2,5-dimethoxyphenyl)-4-methoxybenzamide	532276	CFFUCEHTAUTSAT-UHFFFAOYSA-N	NA	60.7	0.18	Serotonin 3a (5-HT3a) receptor (by homology)	HTR3A	P46098
HERB	N-(2,5-dimethoxyphenyl)-4-methoxybenzamide	532276	CFFUCEHTAUTSAT-UHFFFAOYSA-N	NA	60.7	0.18	Tyrosine-protein kinase HCK	HCK	P08631
HERB	5-[(E)-undec-1-enyl]-1,3-benzodioxole	134884778	DEHDKPYUMUUMTK-ZHACJKMWSA-N	NA	47.97	0.18	Cytochrome P450 19A1	CYP19A1	P11511
HERB	5-[(E)-undec-1-enyl]-1,3-benzodioxole	134884778	DEHDKPYUMUUMTK-ZHACJKMWSA-N	NA	47.97	0.18	Vanilloid receptor	TRPV1	Q8NER1
HERB	5-[(E)-undec-1-enyl]-1,3-benzodioxole	134884778	DEHDKPYUMUUMTK-ZHACJKMWSA-N	NA	47.97	0.18	Histone deacetylase 6	HDAC6	Q9UBN7
HERB	5-[(E)-undec-1-enyl]-1,3-benzodioxole	134884778	DEHDKPYUMUUMTK-ZHACJKMWSA-N	NA	47.97	0.18	Histone deacetylase 1	HDAC1	Q13547
HERB	5-[(E)-undec-1-enyl]-1,3-benzodioxole	134884778	DEHDKPYUMUUMTK-ZHACJKMWSA-N	NA	47.97	0.18	Prostaglandin E synthase	PTGES	O14684
HERB	5-[(E)-undec-1-enyl]-1,3-benzodioxole	134884778	DEHDKPYUMUUMTK-ZHACJKMWSA-N	NA	47.97	0.18	Vascular endothelial growth factor receptor 2	KDR	P35968
HERB	5-[(E)-undec-1-enyl]-1,3-benzodioxole	134884778	DEHDKPYUMUUMTK-ZHACJKMWSA-N	NA	47.97	0.18	Steryl-sulfatase	STS	P08842
HERB	5-[(E)-undec-1-enyl]-1,3-benzodioxole	134884778	DEHDKPYUMUUMTK-ZHACJKMWSA-N	NA	47.97	0.18	Toll-like receptor (TLR7/TLR9)	TLR9	Q9NR96
HERB	5-[(E)-undec-1-enyl]-1,3-benzodioxole	134884778	DEHDKPYUMUUMTK-ZHACJKMWSA-N	NA	47.97	0.18	Inhibitor of NF-kappa-B kinase (IKK)	IKBKG IKBKB CHUK	Q9Y6K9 O14920 O15111
HERB	5-[(E)-undec-1-enyl]-1,3-benzodioxole	134884778	DEHDKPYUMUUMTK-ZHACJKMWSA-N	NA	47.97	0.18	Glyoxalase I	GLO1	Q04760
HERB	5-[(E)-undec-1-enyl]-1,3-benzodioxole	134884778	DEHDKPYUMUUMTK-ZHACJKMWSA-N	NA	47.97	0.18	G-protein coupled receptor 84	GPR84	Q9NQS5
HERB	5-[(E)-undec-1-enyl]-1,3-benzodioxole	134884778	DEHDKPYUMUUMTK-ZHACJKMWSA-N	NA	47.97	0.18	Voltage-gated calcium channel alpha2/delta subunit 1	CACNA2D1	P54289
HERB	5-[(E)-undec-1-enyl]-1,3-benzodioxole	134884778	DEHDKPYUMUUMTK-ZHACJKMWSA-N	NA	47.97	0.18	Deoxycytidine kinase	DCK	P27707
HERB	5-[(E)-undec-1-enyl]-1,3-benzodioxole	134884778	DEHDKPYUMUUMTK-ZHACJKMWSA-N	NA	47.97	0.18	Monoamine oxidase A	MAOA	P21397
